# Supplementary material for: Post-transcriptional regulation of several biological processes involved in latex production in Hevea brasiliensis
Source: PeerJ. 2020 Apr 29;8:e8932. doi: 10.7717/peerj.8932 (PMC7195832; doi:10.7717/peerj.8932)
Supplement: Table S8 [file peerj-08-8932-s008.xlsx]

## Sheet: 8.
GO annotation for each tissue texted
Tissue	Protein Accession	Sequence Length	Analysis	Signature Accession	Signature Description	Start location	Stop location	e-value	InterPro annotations	InterPro annotations - description	GO annotations	Patways annotations								GO term bark
bark	CL1121Contig1_25	6f1b51fb8b43032b99cddefef150f145	515	PRINTS	PR00148	Enolase signature	454	471	6.8E-52	T	2017-08-01	IPR000941	Enolase	GO:0000015|GO:0000287|GO:0004634|GO:0006096						O:0000015	phosphopyruvate hydratase complex	C	cellular component
bark	CL1121Contig1_25	6f1b51fb8b43032b99cddefef150f145	515	PRINTS	PR00148	Enolase signature	247	260	6.8E-52	T	2017-08-01	IPR000941	Enolase	GO:0000015|GO:0000287|GO:0004634|GO:0006096						GO:0000148	1,3-beta-D-glucan synthase complex	C	cellular component
bark	CL1121Contig1_25	6f1b51fb8b43032b99cddefef150f145	515	PRINTS	PR00148	Enolase signature	120	134	6.8E-52	T	2017-08-01	IPR000941	Enolase	GO:0000015|GO:0000287|GO:0004634|GO:0006096						GO:0000287	magnesium ion binding	F	Molecular function
bark	CL1121Contig1_25	6f1b51fb8b43032b99cddefef150f145	515	PRINTS	PR00148	Enolase signature	190	206	6.8E-52	T	2017-08-01	IPR000941	Enolase	GO:0000015|GO:0000287|GO:0004634|GO:0006096						GO:0003677	DNA binding	F	Molecular function
bark	CL1121Contig1_25	6f1b51fb8b43032b99cddefef150f145	515	PRINTS	PR00148	Enolase signature	402	413	6.8E-52	T	2017-08-01	IPR000941	Enolase	GO:0000015|GO:0000287|GO:0004634|GO:0006096						GO:0003843	1,3-beta-D-glucan synthase activity	F	Molecular function
bark	CL1121Contig1_25	6f1b51fb8b43032b99cddefef150f145	515	PRINTS	PR00148	Enolase signature	425	439	6.8E-52	T	2017-08-01	IPR000941	Enolase	GO:0000015|GO:0000287|GO:0004634|GO:0006096						GO:0004356	glutamate-ammonia ligase activity	F	Molecular function
bark	CL1121Contig1_25	6f1b51fb8b43032b99cddefef150f145	515	SMART	SM01192		225	515	4.6E-192	T	2017-08-01	IPR020810	Enolase, C-terminal TIM barrel domain							GO:0004553	hydrolase activity, hydrolyzing O-glycosyl compounds	F	Molecular function
bark	CL1121Contig1_25	6f1b51fb8b43032b99cddefef150f145	515	SUPERFAMILY	SSF51604		225	506	5.58E-124	T	2017-08-01	IPR029065	Enolase C-terminal domain-like							GO:0004634	phosphopyruvate hydratase activity	F	Molecular function
bark	CL1121Contig1_25	6f1b51fb8b43032b99cddefef150f145	515	SMART	SM01193		89	217	8.7E-83	T	2017-08-01	IPR020811	Enolase, N-terminal							GO:0005515	protein binding	F	Molecular function
bark	CL1121Contig1_25	6f1b51fb8b43032b99cddefef150f145	515	SUPERFAMILY	SSF54826		88	220	7.51E-52	T	2017-08-01	IPR029017	Enolase N-terminal domain-like							GO:0005975	carbohydrate metabolic process	P	Biological process
bark	CL1121Contig1_25	6f1b51fb8b43032b99cddefef150f145	515	Pfam	PF00113	Enolase, C-terminal TIM barrel domain	226	513	6.5E-148	T	2017-08-01	IPR020810	Enolase, C-terminal TIM barrel domain							GO:0006075	(1->3)-beta-D-glucan biosynthetic process	P	Biological process
bark	CL1121Contig1_25	6f1b51fb8b43032b99cddefef150f145	515	ProSitePatterns	PS00164	Enolase signature.	425	438	-	T	2017-08-01	IPR020809	Enolase, conserved site							GO:0006096	glycolytic process	P	Biological process
bark	CL1121Contig1_25	6f1b51fb8b43032b99cddefef150f145	515	Gene3D	G3DSA:3.20.20.120		211	513	3.9E-155	T	2017-08-01	IPR029065	Enolase C-terminal domain-like							GO:0006542	glutamine biosynthetic process	P	Biological process
bark	CL1121Contig1_25	6f1b51fb8b43032b99cddefef150f145	515	Hamap	MF_00318	Enolase [eno].	87	502	43.457	T	2017-08-01	IPR000941	Enolase	GO:0000015|GO:0000287|GO:0004634|GO:0006096						GO:0006807	nitrogen compound metabolic process	P	Biological process
bark	CL1121Contig1_25	6f1b51fb8b43032b99cddefef150f145	515	Pfam	PF03952	Enolase, N-terminal domain	89	217	8.1E-56	T	2017-08-01	IPR020811	Enolase, N-terminal							GO:0007165	signal transduction	P	Biological process
bark	CL1121Contig1_25	6f1b51fb8b43032b99cddefef150f145	515	TIGRFAM	TIGR01060	eno: phosphopyruvate hydratase	90	510	2.9E-165	T	2017-08-01	IPR000941	Enolase	GO:0000015|GO:0000287|GO:0004634|GO:0006096						GO:0008430	selenium binding	F	Molecular function
bark	CL1121Contig1_25	6f1b51fb8b43032b99cddefef150f145	515	Gene3D	G3DSA:3.30.390.10		89	209	1.3E-53	T	2017-08-01	IPR029017	Enolase N-terminal domain-like							GO:0010207	photosystem II assembly	P	Biological process
bark	CL19Contig4_15	60c8506d9978dfe79ecae6cc384f2d03	427	Gene3D	G3DSA:1.10.10.60		329	379	9.2E-13	T	2017-08-01	IPR009057	Homeodomain-like	GO:0003677						GO:0015743	malate transport	P	Biological process
bark	CL19Contig4_15	60c8506d9978dfe79ecae6cc384f2d03	427	SMART	SM00717		327	380	1.6E-10	T	2017-08-01	IPR001005	SANT/Myb domain							GO:0015979	photosynthesis	P	Biological process
bark	CL19Contig4_15	60c8506d9978dfe79ecae6cc384f2d03	427	Pfam	PF00249	Myb-like DNA-binding domain	330	378	1.5E-7	T	2017-08-01	IPR001005	SANT/Myb domain							GO:0016020	membrane	C	cellular component
bark	CL19Contig4_15	60c8506d9978dfe79ecae6cc384f2d03	427	SUPERFAMILY	SSF46689		329	392	2.01E-16	T	2017-08-01	IPR009057	Homeodomain-like	GO:0003677						GO:0017038	protein import	P	Biological process
bark	CL19Contig4_15	60c8506d9978dfe79ecae6cc384f2d03	427	ProSiteProfiles	PS51294	Myb-type HTH DNA-binding domain profile.	323	382	16.372	T	2017-08-01	IPR017930	Myb domain
bark	CL20179Contig1_10	ff8ff84175ec85de5f3324c81dcd11a3	157	Pfam	PF11744	Aluminium activated malate transporter	1	148	2.7E-64	T	2017-08-01	IPR020966	Aluminum-activated malate transporter	GO:0015743
bark	CL1Contig11688_3	d360dfe14c3d025322397164324adece	99	SUPERFAMILY	SSF51445		11	90	4.51E-13	T	2017-08-01	IPR017853	Glycoside hydrolase superfamily
bark	CL1Contig11688_3	d360dfe14c3d025322397164324adece	99	Pfam	PF01055	Glycosyl hydrolases family 31	9	68	4.6E-16	T	2017-08-01	IPR000322	Glycoside hydrolase family 31	GO:0004553|GO:0005975
bark	CL1Contig11730_19	154b97d5fae9bd05256ffc9dcc5f1638	388	Pfam	PF03951	Glutamine synthetase, beta-Grasp domain	54	129	2.2E-10	T	2017-08-01	IPR008147	Glutamine synthetase, beta-Grasp domain	GO:0004356|GO:0006542|GO:0006807
bark	CL1Contig11730_19	154b97d5fae9bd05256ffc9dcc5f1638	388	ProSitePatterns	PS00181	Glutamine synthetase putative ATP-binding region signature.	269	285	-	T	2017-08-01	IPR027303	Glutamine synthetase, glycine-rich site
bark	CL1Contig11730_19	154b97d5fae9bd05256ffc9dcc5f1638	388	SUPERFAMILY	SSF54368		46	134	2.49E-18	T	2017-08-01	IPR008147	Glutamine synthetase, beta-Grasp domain	GO:0004356|GO:0006542|GO:0006807
bark	CL1Contig11730_19	154b97d5fae9bd05256ffc9dcc5f1638	388	ProSitePatterns	PS00180	Glutamine synthetase signature 1.	87	104	-	T	2017-08-01	IPR027302	Glutamine synthetase, N-terminal conserved site
bark	CL1Contig11730_19	154b97d5fae9bd05256ffc9dcc5f1638	388	Gene3D	G3DSA:3.30.590.10		152	380	4.5E-62	T	2017-08-01	IPR014746	Glutamine synthetase/guanido kinase, catalytic domain	GO:0003824	Reactome: REACT_13
bark	CL1Contig11730_19	154b97d5fae9bd05256ffc9dcc5f1638	388	SMART	SM01230		135	383	1.0E-60	T	2017-08-01	IPR008146	Glutamine synthetase, catalytic domain	GO:0004356|GO:0006807
bark	CL1Contig11730_19	154b97d5fae9bd05256ffc9dcc5f1638	388	Pfam	PF00120	Glutamine synthetase, catalytic domain	156	379	3.9E-15	T	2017-08-01	IPR008146	Glutamine synthetase, catalytic domain	GO:0004356|GO:0006807
bark	CL1Contig11730_19	154b97d5fae9bd05256ffc9dcc5f1638	388	Gene3D	G3DSA:3.10.20.70		85	135	8.0E-4	T	2017-08-01	IPR008147	Glutamine synthetase, beta-Grasp domain	GO:0004356|GO:0006542|GO:0006807
bark	CL1Contig11730_19	154b97d5fae9bd05256ffc9dcc5f1638	388	SUPERFAMILY	SSF55931		135	384	2.45E-68	T	2017-08-01
bark	CL3134Contig3_2	72cc79bf0f220f999921650c7fc9c079	31	Pfam	PF07516	SecA Wing and Scaffold domain	10	30	2.5E-6	T	2017-08-01	IPR011116	SecA Wing/Scaffold	GO:0016020|GO:0017038
bark	CL3134Contig3_2	72cc79bf0f220f999921650c7fc9c079	31	SUPERFAMILY	SSF81886		10	31	1.44E-7	T	2017-08-01	IPR011116	SecA Wing/Scaffold	GO:0016020|GO:0017038
bark	CL286Contig1_12	cc333eb7f690653710263c8c33b1a0ef	81	Coils	Coil		39	62	-	T	2017-08-01
bark	CL11471Contig1_8	8860929deb3f5815f3f2b482043e4740	87	SUPERFAMILY	SSF48350		30	86	1.81E-5	T	2017-08-01	IPR008936	Rho GTPase activation protein	GO:0007165
bark	CL1Contig16116_15	781561b1133fecb787e5def7315dbb89	61	Pfam	PF02364	1,3-beta-glucan synthase component	9	35	6.0E-6	T	2017-08-01	IPR003440	Glycosyl transferase, family 48	GO:0000148|GO:0003843|GO:0006075|GO:0016020
bark	CL140Contig3_30	8c592adcd915ac54639597f474ddc359	502	Pfam	PF05694	56kDa selenium binding protein (SBP56)	35	502	6.9E-217	T	2017-08-01	IPR008826	Selenium-binding protein	GO:0008430
bark	CL140Contig3_30	8c592adcd915ac54639597f474ddc359	502	Gene3D	G3DSA:2.130.10.10		254	434	2.3E-6	T	2017-08-01	IPR015943	WD40/YVTN repeat-like-containing domain	GO:0005515
bark	CL140Contig3_30	8c592adcd915ac54639597f474ddc359	502	SUPERFAMILY	SSF75011		116	385	2.35E-18	T	2017-08-01
bark	CL140Contig3_30	8c592adcd915ac54639597f474ddc359	502	SUPERFAMILY	SSF75011		417	434	2.35E-18	T	2017-08-01
bark	CL1Contig11688_6	d4669f0238d6073278e5e91f60efb8c8	98	ProSitePatterns	PS00129	Glycosyl hydrolases family 31 active site.	49	56	-	T	2017-08-01	IPR030458	Glycosyl hydrolases family 31, active site
bark	CL1Contig11688_6	d4669f0238d6073278e5e91f60efb8c8	98	SUPERFAMILY	SSF51445		14	98	7.81E-12	T	2017-08-01	IPR017853	Glycoside hydrolase superfamily
bark	CL1Contig11688_6	d4669f0238d6073278e5e91f60efb8c8	98	Pfam	PF01055	Glycosyl hydrolases family 31	19	97	8.9E-15	T	2017-08-01	IPR000322	Glycoside hydrolase family 31	GO:0004553|GO:0005975
bark	CL286Contig1_10	34feaf66e72ae93bc64c9dea2fc2131e	98	Pfam	PF11264	Thylakoid formation protein	4	70	1.5E-28	T	2017-08-01	IPR017499	Protein Thf1	GO:0010207|GO:0015979
bark	CL1Contig16116_17	3077c93d5cbee8de2234cfb8f633319f	73	Coils	Coil		52	73	-	T	2017-08-01
																				GO term latex
latex	CL10939Contig1_8	023433ea0c13348e638e36d365f00ee9	34	ProSiteProfiles	PS50883	EAL domain profile.	1	34	8.672	T	2017-08-01	IPR001633	EAL domain							GO:0000276	mitochondrial proton-transporting ATP synthase complex, coupling factor F(o)	C	cellular component
latex	CL11Contig16_7	5a0ecaf00c35e0ef4afaab9ccda20292	148	Pfam	PF02496	ABA/WDS induced protein	39	113	1.6E-33	T	2017-08-01	IPR003496	ABA/WDS induced protein	GO:0006950						GO:0003677	DNA binding	F	Molecular function
latex	CL11Contig4_9	5aa0d613ae8bbad7f2f01d4ef4c9b719	111	Pfam	PF02496	ABA/WDS induced protein	25	101	3.7E-34	T	2017-08-01	IPR003496	ABA/WDS induced protein	GO:0006950						GO:0003723	RNA binding	F	Molecular function
latex	CL11Contig7_8	40de74227ef90d6b9d31c88151a9abf8	151	Pfam	PF02496	ABA/WDS induced protein	44	118	1.6E-33	T	2017-08-01	IPR003496	ABA/WDS induced protein	GO:0006950						GO:0003824	catalytic activity	F	Molecular function
latex	CL12286Contig1_3	18ca21735a8b7cde3a865cbd1f4debb8	79	Coils	Coil		16	36	-	T	2017-08-01									GO:0004190	aspartic-type endopeptidase activity	F	Molecular function
latex	CL12286Contig1_3	18ca21735a8b7cde3a865cbd1f4debb8	79	Pfam	PF10187	N-terminal domain of NEFA-interacting nuclear protein NIP30	6	41	1.2E-6	T	2017-08-01	IPR019331	FAM192A/Fyv6, N-terminal							GO:0004356	glutamate-ammonia ligase activity	F	Molecular function
latex	CL14962Contig1_6	9e1141f5517a104e58a11210ebd672b5	108	Pfam	PF10358	N-terminal C2 in EEIG1 and EHBP1 proteins	8	108	1.4E-13	T	2017-08-01	IPR019448	EEIG1/EHBP1 N-terminal domain							GO:0006508	proteolysis	P	Biological process
latex	CL15689Contig1_5	094817baaf2eb7c99a4fe7449b1b2fd2	100	Gene3D	G3DSA:1.10.510.10		2	93	6.3E-9	T	2017-08-01									GO:0006807	nitrogen compound metabolic process	P	Biological process
latex	CL15689Contig1_5	094817baaf2eb7c99a4fe7449b1b2fd2	100	SUPERFAMILY	SSF56112		4	86	4.62E-7	T	2017-08-01	IPR011009	Protein kinase-like domain							GO:0006950	response to stress	P	Biological process
latex	CL15Contig19_12	118f33b6929b6ec6857e79f57cfe4f7a	198	ProSitePatterns	PS00825	Elongation factor 1 beta/beta'/delta chain signature 2.	187	198	-	T	2017-08-01	IPR001326	Translation elongation factor EF1B, beta/delta chains, conserved site	GO:0003746|GO:0005853|GO:0006414	Reactome: REACT_17015|Reactome: REACT_71					GO:0008152	metabolic process	P	Biological process
latex	CL15Contig19_12	118f33b6929b6ec6857e79f57cfe4f7a	198	SMART	SM00888		109	198	3.2E-36	T	2017-08-01	IPR014038	Translation elongation factor EF1B, beta/delta subunit, guanine nucleotide exchange domain	GO:0003746|GO:0006414	Reactome: REACT_17015|Reactome: REACT_71					GO:0008168	methyltransferase activity	F	Molecular function
latex	CL15Contig19_12	118f33b6929b6ec6857e79f57cfe4f7a	198	Gene3D	G3DSA:3.30.70.60		103	198	1.5E-40	T	2017-08-01	IPR014717	Translation elongation factor EF1B/ribosomal protein S6							GO:0008171	O-methyltransferase activity	F	Molecular function
latex	CL15Contig19_12	118f33b6929b6ec6857e79f57cfe4f7a	198	Pfam	PF00736	EF-1 guanine nucleotide exchange domain	111	198	2.8E-33	T	2017-08-01	IPR014038	Translation elongation factor EF1B, beta/delta subunit, guanine nucleotide exchange domain	GO:0003746|GO:0006414	Reactome: REACT_17015|Reactome: REACT_71					GO:0008428	ribonuclease inhibitor activity	F	Molecular function
latex	CL15Contig19_12	118f33b6929b6ec6857e79f57cfe4f7a	198	SUPERFAMILY	SSF54984		106	198	2.22E-31	T	2017-08-01	IPR014038	Translation elongation factor EF1B, beta/delta subunit, guanine nucleotide exchange domain	GO:0003746|GO:0006414	Reactome: REACT_17015|Reactome: REACT_71					GO:0015078	hydrogen ion transmembrane transporter activity	F	Molecular function
latex	CL15Contig19_12	118f33b6929b6ec6857e79f57cfe4f7a	198	ProSitePatterns	PS00824	Elongation factor 1 beta/beta'/delta chain signature 1.	74	82	-	T	2017-08-01	IPR001326	Translation elongation factor EF1B, beta/delta chains, conserved site	GO:0003746|GO:0005853|GO:0006414	Reactome: REACT_17015|Reactome: REACT_71					GO:0015986	ATP synthesis coupled proton transport	P	Biological process
latex	CL1648Contig1_11	2480285d7f035c460fb78431c9dcb888	190	Gene3D	G3DSA:3.30.590.10		3	182	1.5E-50	T	2017-08-01	IPR014746	Glutamine synthetase/guanido kinase, catalytic domain	GO:0003824	Reactome: REACT_13					GO:0016787	hydrolase activity	F	Molecular function
latex	CL1648Contig1_11	2480285d7f035c460fb78431c9dcb888	190	SMART	SM01230		1	185	2.4E-21	T	2017-08-01	IPR008146	Glutamine synthetase, catalytic domain	GO:0004356|GO:0006807						GO:0030170	pyridoxal phosphate binding	F	Molecular function
latex	CL1648Contig1_11	2480285d7f035c460fb78431c9dcb888	190	Pfam	PF00120	Glutamine synthetase, catalytic domain	4	181	8.9E-15	T	2017-08-01	IPR008146	Glutamine synthetase, catalytic domain	GO:0004356|GO:0006807						GO:0051252	regulation of RNA metabolic process	P	Biological process
latex	CL1648Contig1_11	2480285d7f035c460fb78431c9dcb888	190	ProSitePatterns	PS00181	Glutamine synthetase putative ATP-binding region signature.	71	87	-	T	2017-08-01	IPR027303	Glutamine synthetase, glycine-rich site
latex	CL1648Contig1_11	2480285d7f035c460fb78431c9dcb888	190	SUPERFAMILY	SSF55931		2	186	2.16E-53	T	2017-08-01
latex	CL1648Contig2_7	4cb90f85d4593c86c66818ce51994a36	107	Gene3D	G3DSA:3.30.590.10		1	102	1.6E-19	T	2017-08-01	IPR014746	Glutamine synthetase/guanido kinase, catalytic domain	GO:0003824	Reactome: REACT_13
latex	CL1648Contig2_7	4cb90f85d4593c86c66818ce51994a36	107	SUPERFAMILY	SSF55931		1	104	1.08E-21	T	2017-08-01
latex	CL1648Contig2_7	4cb90f85d4593c86c66818ce51994a36	107	ProSitePatterns	PS00181	Glutamine synthetase putative ATP-binding region signature.	40	56	-	T	2017-08-01	IPR027303	Glutamine synthetase, glycine-rich site
latex	CL1648Contig2_7	4cb90f85d4593c86c66818ce51994a36	107	Pfam	PF00120	Glutamine synthetase, catalytic domain	2	57	1.8E-5	T	2017-08-01	IPR008146	Glutamine synthetase, catalytic domain	GO:0004356|GO:0006807
latex	CL17244Contig1_5	f1195f99bd89142bcad12e5aab345b13	86	SUPERFAMILY	SSF53474		6	76	2.28E-10	T	2017-08-01	IPR029058	Alpha/Beta hydrolase fold
latex	CL17244Contig1_5	f1195f99bd89142bcad12e5aab345b13	86	Pfam	PF07859	alpha/beta hydrolase fold	2	58	2.2E-13	T	2017-08-01	IPR013094	Alpha/beta hydrolase fold-3	GO:0008152|GO:0016787
latex	CL17244Contig1_5	f1195f99bd89142bcad12e5aab345b13	86	Gene3D	G3DSA:3.40.50.1820		2	78	6.1E-20	T	2017-08-01	IPR029058	Alpha/Beta hydrolase fold
latex	CL1973Contig1_6	1241aaa84dadce53f46bc8005e93edc2	212	Pfam	PF14299	Phloem protein 2	74	212	5.1E-35	T	2017-08-01	IPR025886	Phloem protein 2-like
latex	CL22Contig5_4	81a4ecf5d35a7db0a5ac256dae260f2e	40	ProDom	PD010978	LATE EMBRYOGENESIS ABUNDANT DESICCATION SIMILAR PROTECTANT PROTEINS RELATED EMBRYOGENESIS-ABUNDANT EMBRYOGENESIS-LIKE	1	26	2.0E-5	T	2017-08-01
latex	CL2759Contig2_2	022be892243cff743f2f16b3f60120ac	41	Pfam	PF01053	Cys/Met metabolism PLP-dependent enzyme	2	39	3.7E-11	T	2017-08-01	IPR000277	Cys/Met metabolism, pyridoxal phosphate-dependent enzyme	GO:0030170
latex	CL2759Contig2_2	022be892243cff743f2f16b3f60120ac	41	SUPERFAMILY	SSF53383		6	39	9.92E-9	T	2017-08-01	IPR015424	Pyridoxal phosphate-dependent transferase
latex	CL2759Contig2_2	022be892243cff743f2f16b3f60120ac	41	Gene3D	G3DSA:3.90.1150.10		3	41	1.2E-10	T	2017-08-01	IPR015422	Pyridoxal phosphate-dependent transferase, major region, subdomain 2	GO:0003824
latex	CL325Contig4_18	e3f9778f26665dd7feee4703bb116a0b	352	SUPERFAMILY	SSF53474		106	349	1.24E-50	T	2017-08-01	IPR029058	Alpha/Beta hydrolase fold
latex	CL325Contig4_18	e3f9778f26665dd7feee4703bb116a0b	352	Pfam	PF07859	alpha/beta hydrolase fold	116	329	7.4E-61	T	2017-08-01	IPR013094	Alpha/beta hydrolase fold-3	GO:0008152|GO:0016787
latex	CL325Contig4_18	e3f9778f26665dd7feee4703bb116a0b	352	Gene3D	G3DSA:3.40.50.1820		19	349	2.9E-77	T	2017-08-01	IPR029058	Alpha/Beta hydrolase fold
latex	CL325Contig4_18	e3f9778f26665dd7feee4703bb116a0b	352	ProSitePatterns	PS01174	Lipolytic enzymes "G-D-X-G" family, putative serine active site.	192	204	-	T	2017-08-01	IPR033140	Lipase, GDXG, putative serine active site
latex	CL325Contig4_18	e3f9778f26665dd7feee4703bb116a0b	352	ProSitePatterns	PS01173	Lipolytic enzymes "G-D-X-G" family, putative histidine active site.	116	132	-	T	2017-08-01	IPR002168	Lipase, GDXG, putative histidine active site	GO:0008152|GO:0016787
latex	CL325Contig4_33	39560c6568ec20ca0f382e3bd0401403	17	Coils	Coil		16	17	-	T	2017-08-01
latex	CL43Contig22_2	7c55ab96c56492fd50c5146e941187fb	51	Gene3D	G3DSA:3.30.420.40		1	25	7.6E-4	T	2017-08-01
latex	CL43Contig22_3	87355d9733d3318ccf5569b327386f70	46	SUPERFAMILY	SSF53067		4	46	6.48E-18	T	2017-08-01
latex	CL43Contig22_3	87355d9733d3318ccf5569b327386f70	46	ProSitePatterns	PS00432	Actins signature 2.	27	35	-	T	2017-08-01	IPR004001	Actin, conserved site
latex	CL43Contig22_3	87355d9733d3318ccf5569b327386f70	46	Pfam	PF00022	Actin	2	46	2.8E-21	T	2017-08-01	IPR004000	Actin family
latex	CL43Contig22_3	87355d9733d3318ccf5569b327386f70	46	Gene3D	G3DSA:3.30.420.40		3	44	1.1E-19	T	2017-08-01
latex	CL4480Contig1_9	7bf194e3a979c00a25c1648a0d2907ec	177	Gene3D	G3DSA:3.40.50.150		2	173	8.2E-60	T	2017-08-01	IPR029063	S-adenosyl-L-methionine-dependent methyltransferase
latex	CL4480Contig1_9	7bf194e3a979c00a25c1648a0d2907ec	177	ProSiteProfiles	PS51683	SAM-dependent O-methyltransferase class II-type profile.	1	175	53.866	T	2017-08-01	IPR016461	O-methyltransferase COMT-type	GO:0008168
latex	CL4480Contig1_9	7bf194e3a979c00a25c1648a0d2907ec	177	Pfam	PF00891	O-methyltransferase	2	161	3.5E-63	T	2017-08-01	IPR001077	O-methyltransferase, family 2	GO:0008171
latex	CL4480Contig1_9	7bf194e3a979c00a25c1648a0d2907ec	177	SUPERFAMILY	SSF53335		2	172	3.24E-52	T	2017-08-01	IPR029063	S-adenosyl-L-methionine-dependent methyltransferase
latex	CL4564Contig1_9	0faed1f46a0dd23ecd7432d5812fe49d	218	Gene3D	G3DSA:1.10.10.60		72	132	3.0E-30	T	2017-08-01	IPR009057	Homeodomain-like	GO:0003677
latex	CL4564Contig1_9	0faed1f46a0dd23ecd7432d5812fe49d	218	SUPERFAMILY	SSF46689		71	132	7.17E-19	T	2017-08-01	IPR009057	Homeodomain-like	GO:0003677
latex	CL4564Contig1_9	0faed1f46a0dd23ecd7432d5812fe49d	218	Coils	Coil		215	218	-	T	2017-08-01
latex	CL4564Contig1_9	0faed1f46a0dd23ecd7432d5812fe49d	218	ProSiteProfiles	PS51294	Myb-type HTH DNA-binding domain profile.	71	131	14.115	T	2017-08-01	IPR017930	Myb domain
latex	CL4564Contig1_9	0faed1f46a0dd23ecd7432d5812fe49d	218	TIGRFAM	TIGR01557	myb_SHAQKYF: myb-like DNA-binding domain, SHAQKYF class	74	129	1.3E-27	T	2017-08-01	IPR006447	Myb domain, plants
latex	CL4564Contig1_9	0faed1f46a0dd23ecd7432d5812fe49d	218	Pfam	PF00249	Myb-like DNA-binding domain	76	127	2.4E-8	T	2017-08-01	IPR001005	SANT/Myb domain
latex	CL482Contig4_8	c85fce0c647a99a54d92b72035228fce	159	Gene3D	G3DSA:3.50.30.40		25	152	1.5E-38	T	2017-08-01	IPR005493	Ribonuclease E inhibitor RraA/RraA-like protein
latex	CL482Contig4_8	c85fce0c647a99a54d92b72035228fce	159	TIGRFAM	TIGR01935	NOT-MenG: RraA family	27	153	4.9E-53	T	2017-08-01	IPR010203	Regulator of ribonuclease activity A	GO:0008428|GO:0051252
latex	CL482Contig4_8	c85fce0c647a99a54d92b72035228fce	159	Pfam	PF03737	Demethylmenaquinone methyltransferase	27	152	4.0E-32	T	2017-08-01	IPR005493	Ribonuclease E inhibitor RraA/RraA-like protein
latex	CL482Contig4_8	c85fce0c647a99a54d92b72035228fce	159	SUPERFAMILY	SSF89562		25	152	4.06E-34	T	2017-08-01	IPR005493	Ribonuclease E inhibitor RraA/RraA-like protein
latex	CL517Contig7_6	880307794edfcf1f521b803fab9ef028	106	Coils	Coil		1	35	-	T	2017-08-01
latex	CL517Contig7_6	880307794edfcf1f521b803fab9ef028	106	Coils	Coil		50	70	-	T	2017-08-01
latex	CL5497Contig1_7	f2bda0a3141b4356e61119c08426493d	156	SMART	SM00367		23	47	0.017	T	2017-08-01	IPR006553	Leucine-rich repeat, cysteine-containing subtype
latex	CL5497Contig1_7	f2bda0a3141b4356e61119c08426493d	156	SMART	SM00367		48	73	270.0	T	2017-08-01	IPR006553	Leucine-rich repeat, cysteine-containing subtype
latex	CL5497Contig1_7	f2bda0a3141b4356e61119c08426493d	156	SUPERFAMILY	SSF52047		3	63	1.43E-7	T	2017-08-01
latex	CL5497Contig1_7	f2bda0a3141b4356e61119c08426493d	156	Gene3D	G3DSA:3.80.10.10		2	71	2.1E-9	T	2017-08-01	IPR032675	Leucine-rich repeat domain, L domain-like
latex	CL6028Contig1_4	9bdddb0e82a0eb8c5d3c34601ca07a7c	97	Pfam	PF04520	Senescence regulator	5	91	1.6E-7	T	2017-08-01	IPR007608	Senescence regulator S40
latex	CL724Contig2_5	a3cee182b0fa21fd635d8dfeeac1343f	112	Pfam	PF04718	Mitochondrial ATP synthase g subunit	20	112	4.5E-16	T	2017-08-01	IPR006808	ATPase, F0 complex, subunit G, mitochondrial	GO:0000276|GO:0015078|GO:0015986
latex	CL7372Contig1_5	55f582b9ba2a277e06b3c4f67b18cc8a	94	Pfam	PF11955	Plant organelle RNA recognition domain	1	76	2.2E-34	T	2017-08-01	IPR021099	Plant organelle RNA recognition domain
latex	CL8280Contig1_5	c27fa7aabc0d12f08bab48ee15372e44	113	ProSiteProfiles	PS51295	CRM domain profile.	12	111	16.973	T	2017-08-01	IPR001890	RNA-binding, CRM domain	GO:0003723
latex	CL8280Contig1_5	c27fa7aabc0d12f08bab48ee15372e44	113	SMART	SM01103		14	100	6.8E-22	T	2017-08-01	IPR001890	RNA-binding, CRM domain	GO:0003723
latex	CL8280Contig1_5	c27fa7aabc0d12f08bab48ee15372e44	113	SUPERFAMILY	SSF75471		13	102	2.22E-20	T	2017-08-01	IPR001890	RNA-binding, CRM domain	GO:0003723
latex	CL8280Contig1_5	c27fa7aabc0d12f08bab48ee15372e44	113	ProDom	PD010559	RNA-BINDING YHBY UPF0044 PREDICTED RNA RIBOSOMAL CONTAINING KH BINDING DOMAIN	20	101	1.0E-31	T	2017-08-01	IPR001890	RNA-binding, CRM domain	GO:0003723
latex	CL8280Contig1_5	c27fa7aabc0d12f08bab48ee15372e44	113	Pfam	PF01985	CRS1 / YhbY (CRM) domain	14	100	5.1E-17	T	2017-08-01	IPR001890	RNA-binding, CRM domain	GO:0003723
latex	CL8280Contig1_5	c27fa7aabc0d12f08bab48ee15372e44	113	Gene3D	G3DSA:3.30.110.60		13	105	1.3E-22	T	2017-08-01	IPR001890	RNA-binding, CRM domain	GO:0003723
latex	CL847Contig1_17	5fb67a8746220508b8f6a12e06f551f6	258	SMART	SM01179		35	175	1.4E-55	T	2017-08-01	IPR008580	PPPDE putative peptidase domain
latex	CL847Contig1_17	5fb67a8746220508b8f6a12e06f551f6	258	Pfam	PF05903	PPPDE putative peptidase domain	37	172	1.0E-47	T	2017-08-01	IPR008580	PPPDE putative peptidase domain
latex	CL8702Contig1_10	6ceb89640d7f8ab359440382e3bbc0df	232	ProSitePatterns	PS00141	Eukaryotic and viral aspartyl proteases active site.	113	124	-	T	2017-08-01	IPR001969	Aspartic peptidase, active site	GO:0004190|GO:0006508
latex	CL8702Contig1_10	6ceb89640d7f8ab359440382e3bbc0df	232	Pfam	PF14543	Xylanase inhibitor N-terminal	98	227	1.9E-39	T	2017-08-01	IPR032861	Xylanase inhibitor, N-terminal
latex	CL8702Contig1_10	6ceb89640d7f8ab359440382e3bbc0df	232	ProSiteProfiles	PS51767	Peptidase family A1 domain profile.	98	232	27.104	T	2017-08-01	IPR033121	Peptidase family A1 domain
latex	CL8702Contig1_10	6ceb89640d7f8ab359440382e3bbc0df	232	Gene3D	G3DSA:2.40.70.10		88	225	1.2E-27	T	2017-08-01	IPR021109	Aspartic peptidase domain
latex	CL8702Contig1_10	6ceb89640d7f8ab359440382e3bbc0df	232	SUPERFAMILY	SSF50630		92	224	4.33E-39	T	2017-08-01	IPR021109	Aspartic peptidase domain
latex	CL8863Contig2_4	fc6bf553a7e33417cc95ed080389d56d	85	SMART	SM00727		33	72	4.4E-9	T	2017-08-01	IPR006636	Heat shock chaperonin-binding
																				GO term reproductive tissues
Reproductive tissues	HSP8IRX02FTSKE411_10	556d420ca9287ff641823bcc7265ff00	65	Pfam	PF04725	Photosystem II 10 kDa polypeptide PsbR	14	51	1.6E-18	T	2017-08-01	IPR006814	Photosystem II PsbR	GO:0009523|GO:0009654|GO:0015979|GO:0042651						GO:0000786	nucleosome	C	cellular component
Reproductive tissues	HSP8IRX02FTSKE411_6	bde9fd0b02a524591ba5d00e9d8b502f	44	Pfam	PF04725	Photosystem II 10 kDa polypeptide PsbR	14	39	1.6E-5	T	2017-08-01	IPR006814	Photosystem II PsbR	GO:0009523|GO:0009654|GO:0015979|GO:0042651						GO:0003676	nucleic acid binding	F	Molecular function
Reproductive tissues	HSP8IRX02FW49Y472_6	56ca39f7fc5b59b8eee69cb4e8378877	157	Gene3D	G3DSA:1.20.1050.10		52	157	3.0E-31	T	2017-08-01	IPR010987	Glutathione S-transferase, C-terminal-like							GO:0003677	DNA binding	F	Molecular function
Reproductive tissues	HSP8IRX02FW49Y472_6	56ca39f7fc5b59b8eee69cb4e8378877	157	SUPERFAMILY	SSF52833		7	50	4.88E-8	T	2017-08-01	IPR012336	Thioredoxin-like fold							GO:0003678	DNA helicase activity	F	Molecular function
Reproductive tissues	HSP8IRX02FW49Y472_6	56ca39f7fc5b59b8eee69cb4e8378877	157	Pfam	PF02798	Glutathione S-transferase, N-terminal domain	9	32	5.9E-5	T	2017-08-01	IPR004045	Glutathione S-transferase, N-terminal	GO:0005515						GO:0003700	transcription factor activity, sequence-specific DNA binding	F	Molecular function
Reproductive tissues	HSP8IRX02FW49Y472_6	56ca39f7fc5b59b8eee69cb4e8378877	157	ProSiteProfiles	PS50404	Soluble glutathione S-transferase N-terminal domain profile.	1	39	12.023	T	2017-08-01	IPR004045	Glutathione S-transferase, N-terminal	GO:0005515						GO:0003735	structural constituent of ribosome	F	Molecular function
Reproductive tissues	HSP8IRX02FW49Y472_6	56ca39f7fc5b59b8eee69cb4e8378877	157	SUPERFAMILY	SSF47616		40	157	7.52E-19	T	2017-08-01	IPR010987	Glutathione S-transferase, C-terminal-like							GO:0004616	phosphogluconate dehydrogenase (decarboxylating) activity	F	Molecular function
Reproductive tissues	HSP8IRX02FW49Y472_6	56ca39f7fc5b59b8eee69cb4e8378877	157	Gene3D	G3DSA:3.40.30.10		8	51	1.0E-10	T	2017-08-01	IPR012336	Thioredoxin-like fold							GO:0005515	protein binding	F	Molecular function
Reproductive tissues	HSP8IRX02FW49Y472_6	56ca39f7fc5b59b8eee69cb4e8378877	157	ProSiteProfiles	PS50405	Soluble glutathione S-transferase C-terminal domain profile.	46	157	13.582	T	2017-08-01	IPR010987	Glutathione S-transferase, C-terminal-like							GO:0005524	ATP binding	F	Molecular function
Reproductive tissues	HSP8IRX02FZJKO411_5	8ff4908ff182992fbb494c04c46869d2	105	Pfam	PF10250	GDP-fucose protein O-fucosyltransferase	17	105	8.7E-8	T	2017-08-01	IPR019378	GDP-fucose protein O-fucosyltransferase							GO:0005622	intracellular	C	cellular component
Reproductive tissues	HSP8IRX02G2PXW504_8	f8a3ead687f2c1e43360565178310b69	148	Gene3D	G3DSA:1.20.5.170		98	140	1.8E-14	T	2017-08-01									GO:0005840	ribosome	C	cellular component
Reproductive tissues	HSP8IRX02G2PXW504_8	f8a3ead687f2c1e43360565178310b69	148	Pfam	PF00170	bZIP transcription factor	95	140	6.5E-14	T	2017-08-01	IPR004827	Basic-leucine zipper domain	GO:0003700|GO:0006355|GO:0043565						GO:0006355	regulation of transcription, DNA-templated	P	Biological process
Reproductive tissues	HSP8IRX02G2PXW504_8	f8a3ead687f2c1e43360565178310b69	148	Coils	Coil		116	140	-	T	2017-08-01									GO:0006412	translation	P	Biological process
Reproductive tissues	HSP8IRX02G2PXW504_8	f8a3ead687f2c1e43360565178310b69	148	SMART	SM00338		93	144	4.1E-8	T	2017-08-01	IPR004827	Basic-leucine zipper domain	GO:0003700|GO:0006355|GO:0043565						GO:0009523	photosystem II	C	cellular component
Reproductive tissues	HSP8IRX02G2PXW504_8	f8a3ead687f2c1e43360565178310b69	148	ProSitePatterns	PS00036	Basic-leucine zipper (bZIP) domain signature.	100	115	-	T	2017-08-01	IPR004827	Basic-leucine zipper domain	GO:0003700|GO:0006355|GO:0043565						GO:0009654	photosystem II oxygen evolving complex	C	cellular component
Reproductive tissues	HSP8IRX02G2PXW504_8	f8a3ead687f2c1e43360565178310b69	148	ProSiteProfiles	PS50217	Basic-leucine zipper (bZIP) domain profile.	95	140	10.864	T	2017-08-01	IPR004827	Basic-leucine zipper domain	GO:0003700|GO:0006355|GO:0043565						GO:0015979	photosynthesis	P	Biological process
Reproductive tissues	HSP8IRX02G2PXW504_8	f8a3ead687f2c1e43360565178310b69	148	SUPERFAMILY	SSF57959		97	140	9.38E-12	T	2017-08-01									GO:0016021	integral component of membrane	C	cellular component
Reproductive tissues	HSP8IRX02G3GBU401_6	323a4c487f738b5e4a2bef825054c917	118	SMART	SM01380		20	103	4.0E-50	T	2017-08-01	IPR000054	Ribosomal protein L31e	GO:0003735|GO:0005840|GO:0006412						GO:0016491	oxidoreductase activity	F	Molecular function
Reproductive tissues	HSP8IRX02G3GBU401_6	323a4c487f738b5e4a2bef825054c917	118	ProSitePatterns	PS01144	Ribosomal protein L31e signature.	64	78	-	T	2017-08-01	IPR020052	Ribosomal protein L31e, conserved site	GO:0003735|GO:0005622|GO:0005840|GO:0006412						GO:0042651	thylakoid membrane	C	cellular component
Reproductive tissues	HSP8IRX02G3GBU401_6	323a4c487f738b5e4a2bef825054c917	118	SUPERFAMILY	SSF54575		21	102	1.96E-33	T	2017-08-01	IPR023621	Ribosomal protein L31e domain							GO:0043565	sequence-specific DNA binding	F	Molecular function
Reproductive tissues	HSP8IRX02G3GBU401_6	323a4c487f738b5e4a2bef825054c917	118	ProDom	PD006030	RIBOSOMAL 60S L31 RIBONUCLEOPROTEIN L31E 50S L31 SUBUNIT STRAIN PHOSPHORYLATION	13	74	2.0E-27	T	2017-08-01	IPR000054	Ribosomal protein L31e	GO:0003735|GO:0005840|GO:0006412						GO:0046982	protein heterodimerization activity	F	Molecular function
Reproductive tissues	HSP8IRX02G3GBU401_6	323a4c487f738b5e4a2bef825054c917	118	Pfam	PF01198	Ribosomal protein L31e	21	102	1.4E-42	T	2017-08-01	IPR000054	Ribosomal protein L31e	GO:0003735|GO:0005840|GO:0006412						GO:0055114	oxidation-reduction process	P	Biological process
Reproductive tissues	HSP8IRX02G3GBU401_6	323a4c487f738b5e4a2bef825054c917	118	Gene3D	G3DSA:3.10.440.10		20	107	4.6E-44	T	2017-08-01	IPR023621	Ribosomal protein L31e domain
Reproductive tissues	HSP8IRX02G53P2476_6	3b6cf855ffcf148dd6673e1068fb2ed0	158	Coils	Coil		59	79	-	T	2017-08-01
Reproductive tissues	HSP8IRX02GAMM6441_3	07bce93e9edfc1d36908991431edae6c	62	Coils	Coil		7	27	-	T	2017-08-01
Reproductive tissues	HSP8IRX02GJPSS490_6	b3936edc95343c6a0ead71293f9bded7	99	Coils	Coil		1	21	-	T	2017-08-01
Reproductive tissues	HSP8IRX02GMRRA472_7	ad08a92337f70d79439c7b545dd60066	157	Coils	Coil		18	76	-	T	2017-08-01
Reproductive tissues	HSP8IRX02GMSOE505_8	8a00a72865acd0f0015b566dd5d1f576	167	ProSiteProfiles	PS51384	Ferredoxin reductase-type FAD binding domain profile.	52	157	10.772	T	2017-08-01	IPR017927	Ferredoxin reductase-type FAD-binding domain	GO:0016491|GO:0055114
Reproductive tissues	HSP8IRX02GMSOE505_8	8a00a72865acd0f0015b566dd5d1f576	167	Gene3D	G3DSA:2.40.30.10		53	153	3.9E-10	T	2017-08-01
Reproductive tissues	HSP8IRX02GMSOE505_8	8a00a72865acd0f0015b566dd5d1f576	167	SUPERFAMILY	SSF63380		55	155	1.04E-9	T	2017-08-01	IPR017938	Riboflavin synthase-like beta-barrel	GO:0016491|GO:0055114
Reproductive tissues	HSP8IRX02GQZN5467_10	b1c53a6b2c4719229e0733610d300622	131	Gene3D	G3DSA:3.30.590.10		1	95	1.0E-16	T	2017-08-01	IPR014746	Glutamine synthetase/guanido kinase, catalytic domain	GO:0003824	Reactome: REACT_13
Reproductive tissues	HSP8IRX02GQZN5467_10	b1c53a6b2c4719229e0733610d300622	131	ProSitePatterns	PS00181	Glutamine synthetase putative ATP-binding region signature.	26	42	-	T	2017-08-01	IPR027303	Glutamine synthetase, glycine-rich site
Reproductive tissues	HSP8IRX02GQZN5467_10	b1c53a6b2c4719229e0733610d300622	131	SUPERFAMILY	SSF55931		1	92	1.37E-19	T	2017-08-01
Reproductive tissues	HSP8IRX02GQZN5467_11	831af1e3ef9ecad5c149c8462fd51a0c	56	SUPERFAMILY	SSF55931		4	52	3.63E-12	T	2017-08-01
Reproductive tissues	HSP8IRX02GQZN5467_11	831af1e3ef9ecad5c149c8462fd51a0c	56	Gene3D	G3DSA:3.30.590.10		3	49	2.2E-12	T	2017-08-01	IPR014746	Glutamine synthetase/guanido kinase, catalytic domain	GO:0003824	Reactome: REACT_13
Reproductive tissues	HSP8IRX02GVB5H463_3	46e6f1a18f751826f26ae94c6f921cd9	102	ProSiteProfiles	PS50127	Ubiquitin-conjugating enzymes family profile.	1	102	35.111	T	2017-08-01	IPR000608	Ubiquitin-conjugating enzyme E2
Reproductive tissues	HSP8IRX02GVB5H463_3	46e6f1a18f751826f26ae94c6f921cd9	102	Pfam	PF00179	Ubiquitin-conjugating enzyme	8	102	7.4E-39	T	2017-08-01	IPR000608	Ubiquitin-conjugating enzyme E2
Reproductive tissues	HSP8IRX02GVB5H463_3	46e6f1a18f751826f26ae94c6f921cd9	102	ProSitePatterns	PS00183	Ubiquitin-conjugating enzymes active site.	63	78	-	T	2017-08-01	IPR023313	Ubiquitin-conjugating enzyme, active site		MetaCyc: PWY-7511|UniPathway: UPA00143
Reproductive tissues	HSP8IRX02GVB5H463_3	46e6f1a18f751826f26ae94c6f921cd9	102	SMART	SM00212		1	102	4.2E-23	T	2017-08-01
Reproductive tissues	HSP8IRX02GVB5H463_3	46e6f1a18f751826f26ae94c6f921cd9	102	SUPERFAMILY	SSF54495		8	102	3.93E-42	T	2017-08-01	IPR016135	Ubiquitin-conjugating enzyme/RWD-like
Reproductive tissues	HSP8IRX02GVB5H463_3	46e6f1a18f751826f26ae94c6f921cd9	102	Gene3D	G3DSA:3.10.110.10		8	102	1.0E-52	T	2017-08-01	IPR016135	Ubiquitin-conjugating enzyme/RWD-like
Reproductive tissues	HSP8IRX02GZZLH379_1	4be4ed9277da6c7c7e2482ad3edaee7d	59	SUPERFAMILY	SSF54495		4	57	6.13E-16	T	2017-08-01	IPR016135	Ubiquitin-conjugating enzyme/RWD-like
Reproductive tissues	HSP8IRX02GZZLH379_1	4be4ed9277da6c7c7e2482ad3edaee7d	59	Pfam	PF00179	Ubiquitin-conjugating enzyme	4	51	1.6E-11	T	2017-08-01	IPR000608	Ubiquitin-conjugating enzyme E2
Reproductive tissues	HSP8IRX02GZZLH379_1	4be4ed9277da6c7c7e2482ad3edaee7d	59	ProSiteProfiles	PS50127	Ubiquitin-conjugating enzymes family profile.	1	46	12.77	T	2017-08-01	IPR000608	Ubiquitin-conjugating enzyme E2
Reproductive tissues	HSP8IRX02GZZLH379_1	4be4ed9277da6c7c7e2482ad3edaee7d	59	Gene3D	G3DSA:3.10.110.10		6	54	1.2E-19	T	2017-08-01	IPR016135	Ubiquitin-conjugating enzyme/RWD-like
Reproductive tissues	HSP8IRX02H6VQF292_4	c623d2634d3e6ed09f413e0a049d64c9	89	Gene3D	G3DSA:3.40.50.720		1	88	2.4E-22	T	2017-08-01	IPR016040	NAD(P)-binding domain
Reproductive tissues	HSP8IRX02H6VQF292_4	c623d2634d3e6ed09f413e0a049d64c9	89	Pfam	PF03446	NAD binding domain of 6-phosphogluconate dehydrogenase	2	88	4.3E-17	T	2017-08-01	IPR006115	6-phosphogluconate dehydrogenase, NADP-binding	GO:0004616|GO:0055114
Reproductive tissues	HSP8IRX02H6VQF292_4	c623d2634d3e6ed09f413e0a049d64c9	89	SUPERFAMILY	SSF51735		2	88	5.01E-16	T	2017-08-01	IPR016040	NAD(P)-binding domain
Reproductive tissues	HSP8IRX02H8CL3492_5	388f245f896f913c00473ba845e9c24d	68	Pfam	PF13266	Protein of unknown function (DUF4057)	5	64	9.5E-28	T	2017-08-01	IPR025131	Domain of unknown function DUF4057
Reproductive tissues	HSP8IRX02H8CL3492_7	366b451ce541ffb64e2e0b57c05f70b4	41	Pfam	PF13266	Protein of unknown function (DUF4057)	3	38	2.4E-13	T	2017-08-01	IPR025131	Domain of unknown function DUF4057
Reproductive tissues	HSP8IRX02HATAW456_1	cb5ce4d31bed1e22137a5da0843bbceb	52	Pfam	PF00179	Ubiquitin-conjugating enzyme	7	44	8.8E-9	T	2017-08-01	IPR000608	Ubiquitin-conjugating enzyme E2
Reproductive tissues	HSP8IRX02HATAW456_1	cb5ce4d31bed1e22137a5da0843bbceb	52	SUPERFAMILY	SSF54495		7	50	4.17E-13	T	2017-08-01	IPR016135	Ubiquitin-conjugating enzyme/RWD-like
Reproductive tissues	HSP8IRX02HATAW456_1	cb5ce4d31bed1e22137a5da0843bbceb	52	Gene3D	G3DSA:3.10.110.10		7	47	3.1E-16	T	2017-08-01	IPR016135	Ubiquitin-conjugating enzyme/RWD-like
Reproductive tissues	HSP8IRX02HATAW456_1	cb5ce4d31bed1e22137a5da0843bbceb	52	ProSiteProfiles	PS50127	Ubiquitin-conjugating enzymes family profile.	7	39	10.004	T	2017-08-01	IPR000608	Ubiquitin-conjugating enzyme E2
Reproductive tissues	HSP8IRX02HFMH5485_8	44f397686dce4a26af8028b2d6c4bfc5	133	Gene3D	G3DSA:1.10.20.10		14	131	1.2E-72	T	2017-08-01	IPR009072	Histone-fold	GO:0046982
Reproductive tissues	HSP8IRX02HFMH5485_8	44f397686dce4a26af8028b2d6c4bfc5	133	SMART	SM00428		46	133	4.7E-51	T	2017-08-01	IPR000164	Histone H3/CENP-A	GO:0000786|GO:0003677
Reproductive tissues	HSP8IRX02HFMH5485_8	44f397686dce4a26af8028b2d6c4bfc5	133	SUPERFAMILY	SSF47113		14	131	6.81E-48	T	2017-08-01	IPR009072	Histone-fold	GO:0046982
Reproductive tissues	HSP8IRX02HFMH5485_8	44f397686dce4a26af8028b2d6c4bfc5	133	PRINTS	PR00622	Histone H3 signature	126	133	4.6E-73	T	2017-08-01	IPR000164	Histone H3/CENP-A	GO:0000786|GO:0003677
Reproductive tissues	HSP8IRX02HFMH5485_8	44f397686dce4a26af8028b2d6c4bfc5	133	PRINTS	PR00622	Histone H3 signature	46	67	4.6E-73	T	2017-08-01	IPR000164	Histone H3/CENP-A	GO:0000786|GO:0003677
Reproductive tissues	HSP8IRX02HFMH5485_8	44f397686dce4a26af8028b2d6c4bfc5	133	PRINTS	PR00622	Histone H3 signature	15	29	4.6E-73	T	2017-08-01	IPR000164	Histone H3/CENP-A	GO:0000786|GO:0003677
Reproductive tissues	HSP8IRX02HFMH5485_8	44f397686dce4a26af8028b2d6c4bfc5	133	PRINTS	PR00622	Histone H3 signature	29	43	4.6E-73	T	2017-08-01	IPR000164	Histone H3/CENP-A	GO:0000786|GO:0003677
Reproductive tissues	HSP8IRX02HFMH5485_8	44f397686dce4a26af8028b2d6c4bfc5	133	PRINTS	PR00622	Histone H3 signature	70	87	4.6E-73	T	2017-08-01	IPR000164	Histone H3/CENP-A	GO:0000786|GO:0003677
Reproductive tissues	HSP8IRX02HFMH5485_8	44f397686dce4a26af8028b2d6c4bfc5	133	PRINTS	PR00622	Histone H3 signature	110	126	4.6E-73	T	2017-08-01	IPR000164	Histone H3/CENP-A	GO:0000786|GO:0003677
Reproductive tissues	HSP8IRX02HFMH5485_8	44f397686dce4a26af8028b2d6c4bfc5	133	PRINTS	PR00622	Histone H3 signature	92	110	4.6E-73	T	2017-08-01	IPR000164	Histone H3/CENP-A	GO:0000786|GO:0003677
Reproductive tissues	HSP8IRX02HFMH5485_8	44f397686dce4a26af8028b2d6c4bfc5	133	ProSitePatterns	PS00959	Histone H3 signature 2.	79	87	-	T	2017-08-01	IPR000164	Histone H3/CENP-A	GO:0000786|GO:0003677
Reproductive tissues	HSP8IRX02HFMH5485_8	44f397686dce4a26af8028b2d6c4bfc5	133	ProSitePatterns	PS00322	Histone H3 signature 1.	27	33	-	T	2017-08-01	IPR000164	Histone H3/CENP-A	GO:0000786|GO:0003677
Reproductive tissues	HSP8IRX02HFMH5485_8	44f397686dce4a26af8028b2d6c4bfc5	133	Pfam	PF00125	Core histone H2A/H2B/H3/H4	13	131	4.9E-45	T	2017-08-01	IPR007125	Histone H2A/H2B/H3	GO:0003677
Reproductive tissues	HSP8IRX02HJA1J426_10	89706205b4122b71c3f96f039c519190	66	Pfam	PF06068	TIP49 C-terminus	15	45	1.6E-6	T	2017-08-01	IPR010339	TIP49, C-terminal	GO:0003678|GO:0005524
Reproductive tissues	HSP8IRX02HJA1J426_7	6f965443c89443dba52678807c6043d4	39	Pfam	PF06068	TIP49 C-terminus	3	32	4.8E-8	T	2017-08-01	IPR010339	TIP49, C-terminal	GO:0003678|GO:0005524
Reproductive tissues	HSP8IRX02HJA1J426_8	012a34b6a777df08598bab21c5662cb5	34	Gene3D	G3DSA:3.40.50.300		7	23	9.4E-4	T	2017-08-01	IPR027417	P-loop containing nucleoside triphosphate hydrolase
Reproductive tissues	HSP8IRX02HO9RD451_2	f832acae2e398a11937d11f4929e3faf	55	SUPERFAMILY	SSF53098		9	45	1.74E-7	T	2017-08-01	IPR012337	Ribonuclease H-like domain	GO:0003676
Reproductive tissues	HSP8IRX02HPLEK481_8	00bdd60ff07b3ad212fc39c949cc58ab	42	Pfam	PF03006	Haemolysin-III related	9	39	4.0E-6	T	2017-08-01	IPR004254	AdipoR/Haemolysin-III-related	GO:0016021
Reproductive tissues	HSP8IRX02I0GKB447_5	6f615d7cf6ee7503993d2b1c0395be8d	108	SMART	SM00389		1	64	1.4E-8	T	2017-08-01	IPR001356	Homeobox domain	GO:0003677
Reproductive tissues	HSP8IRX02I0GKB447_5	6f615d7cf6ee7503993d2b1c0395be8d	108	SUPERFAMILY	SSF46689		1	62	2.52E-18	T	2017-08-01	IPR009057	Homeodomain-like	GO:0003677
Reproductive tissues	HSP8IRX02I0GKB447_5	6f615d7cf6ee7503993d2b1c0395be8d	108	ProSiteProfiles	PS50071	'Homeobox' domain profile.	1	60	15.175	T	2017-08-01	IPR001356	Homeobox domain	GO:0003677
Reproductive tissues	HSP8IRX02I0GKB447_5	6f615d7cf6ee7503993d2b1c0395be8d	108	Pfam	PF00046	Homeobox domain	1	59	2.7E-19	T	2017-08-01	IPR001356	Homeobox domain	GO:0003677
Reproductive tissues	HSP8IRX02I0GKB447_5	6f615d7cf6ee7503993d2b1c0395be8d	108	Gene3D	G3DSA:1.10.10.60		1	61	1.4E-16	T	2017-08-01	IPR009057	Homeodomain-like	GO:0003677
Reproductive tissues	HSP8IRX02J1DU3515_6	f48409b02274646a87c68007ff3bec0d	109	Gene3D	G3DSA:1.10.10.60		7	24	3.1E-4	T	2017-08-01	IPR009057	Homeodomain-like	GO:0003677
Reproductive tissues	HSP8IRX02J1DU3515_6	f48409b02274646a87c68007ff3bec0d	109	Coils	Coil		11	31	-	T	2017-08-01
Reproductive tissues	HSP8IRX02JPCJK469_8	da1d98ae9f991b3e0eae4af29b1c2e88	155	Gene3D	G3DSA:3.40.50.300		29	113	2.6E-16	T	2017-08-01	IPR027417	P-loop containing nucleoside triphosphate hydrolase
Reproductive tissues	HSP8IRX02JPCJK469_8	da1d98ae9f991b3e0eae4af29b1c2e88	155	Pfam	PF00271	Helicase conserved C-terminal domain	45	106	3.7E-6	T	2017-08-01	IPR001650	Helicase, C-terminal
Reproductive tissues	HSP8IRX02JPCJK469_8	da1d98ae9f991b3e0eae4af29b1c2e88	155	SMART	SM00490		20	106	5.6E-12	T	2017-08-01	IPR001650	Helicase, C-terminal
Reproductive tissues	HSP8IRX02JPCJK469_8	da1d98ae9f991b3e0eae4af29b1c2e88	155	ProSiteProfiles	PS51194	Superfamilies 1 and 2 helicase C-terminal domain profile.	1	152	9.179	T	2017-08-01	IPR001650	Helicase, C-terminal
Reproductive tissues	HSP8IRX02JPCJK469_8	da1d98ae9f991b3e0eae4af29b1c2e88	155	SUPERFAMILY	SSF52540		20	121	3.35E-30	T	2017-08-01	IPR027417	P-loop containing nucleoside triphosphate hydrolase
																				GO term embryo
embryo	CL5017Contig1_25	bcc75a6b82ea7e72af6d20db1514a5bb	185	Pfam	PF08590	Domain of unknown function (DUF1771)	26	89	2.3E-13	T	2017-08-01	IPR013899	Domain of unknown function DUF1771							GO:0005515	protein binding	F	Molecular function
embryo	CL5017Contig1_25	bcc75a6b82ea7e72af6d20db1514a5bb	185	SMART	SM01162		25	90	1.1E-11	T	2017-08-01	IPR013899	Domain of unknown function DUF1771
embryo	CL5017Contig1_25	bcc75a6b82ea7e72af6d20db1514a5bb	185	Coils	Coil		26	46	-	T	2017-08-01
embryo	CL15461Contig1_19	08841b76343c51ccb45f968d9ff00a42	154	Pfam	PF13174	Tetratricopeptide repeat	24	47	0.017	T	2017-08-01	IPR019734	Tetratricopeptide repeat	GO:0005515
embryo	CL15461Contig1_19	08841b76343c51ccb45f968d9ff00a42	154	SMART	SM00028		17	50	8.1	T	2017-08-01	IPR019734	Tetratricopeptide repeat	GO:0005515
embryo	CL15461Contig1_19	08841b76343c51ccb45f968d9ff00a42	154	SMART	SM00028		53	86	1.2	T	2017-08-01	IPR019734	Tetratricopeptide repeat	GO:0005515
embryo	CL15461Contig1_19	08841b76343c51ccb45f968d9ff00a42	154	Coils	Coil		105	125	-	T	2017-08-01
embryo	CL15461Contig1_19	08841b76343c51ccb45f968d9ff00a42	154	SUPERFAMILY	SSF48452		22	98	3.8E-11	T	2017-08-01	IPR011990	Tetratricopeptide-like helical domain	GO:0005515
embryo	CL15461Contig1_19	08841b76343c51ccb45f968d9ff00a42	154	ProSiteProfiles	PS50293	TPR repeat region circular profile.	17	86	9.665	T	2017-08-01	IPR013026	Tetratricopeptide repeat-containing domain	GO:0005515
embryo	CL15461Contig1_19	08841b76343c51ccb45f968d9ff00a42	154	Gene3D	G3DSA:1.25.40.10		22	98	4.1E-10	T	2017-08-01	IPR011990	Tetratricopeptide-like helical domain	GO:0005515
																				GO term leaf
Leaf	CL1284Contig1_29	5d24b2478c8e1488844a5a3ad9f90797	217	Hamap	MF_00532_B	30S ribosomal protein S9 [rpsI].	87	217	32.354	T	2017-08-01	IPR023035	Ribosomal protein S9, bacterial/plastid							GO:0000166	nucleotide binding	F	Molecular function
Leaf	CL1284Contig1_29	5d24b2478c8e1488844a5a3ad9f90797	217	ProSitePatterns	PS00360	Ribosomal protein S9 signature.	156	174	-	T	2017-08-01	IPR020574	Ribosomal protein S9, conserved site	GO:0003735|GO:0005840|GO:0006412						GO:0000178	exosome (RNase complex)	C	cellular component
Leaf	CL1284Contig1_29	5d24b2478c8e1488844a5a3ad9f90797	217	SUPERFAMILY	SSF54211		92	217	1.67E-43	T	2017-08-01	IPR020568	Ribosomal protein S5 domain 2-type fold							GO:0000287	magnesium ion binding	F	Molecular function
Leaf	CL1284Contig1_29	5d24b2478c8e1488844a5a3ad9f90797	217	Gene3D	G3DSA:3.30.230.10		92	217	4.2E-47	T	2017-08-01	IPR014721	Ribosomal protein S5 domain 2-type fold, subgroup							GO:0003676	nucleic acid binding	F	Molecular function
Leaf	CL1284Contig1_29	5d24b2478c8e1488844a5a3ad9f90797	217	Pfam	PF00380	Ribosomal protein S9/S16	96	217	1.0E-41	T	2017-08-01	IPR000754	Ribosomal protein S9	GO:0003735|GO:0005840|GO:0006412						GO:0003723	RNA binding	F	Molecular function
Leaf	CL12Contig12_19	7e29e22b1b2a850797dedcfbadabc08f	176	Pfam	PF02427	Photosystem I reaction centre subunit IV / PsaE	123	164	6.2E-20	T	2017-08-01	IPR003375	Photosystem I PsaE, reaction centre subunit IV	GO:0009522|GO:0009538|GO:0015979						GO:0003735	structural constituent of ribosome	F	Molecular function
Leaf	CL12Contig12_19	7e29e22b1b2a850797dedcfbadabc08f	176	ProDom	PD004772	I PHOTOSYSTEM SUBUNIT IV REACTION CENTER MEMBRANE PHOTOSYNTHESIS THYLAKOID CHLOROPLAST	129	164	2.0E-12	T	2017-08-01	IPR003375	Photosystem I PsaE, reaction centre subunit IV	GO:0009522|GO:0009538|GO:0015979						GO:0003824	catalytic activity	F	Molecular function
Leaf	CL12Contig12_19	7e29e22b1b2a850797dedcfbadabc08f	176	SUPERFAMILY	SSF50090		123	167	2.94E-19	T	2017-08-01	IPR008990	Electron transport accessory protein-like domain							GO:0004672	protein kinase activity	F	Molecular function
Leaf	CL12Contig12_19	7e29e22b1b2a850797dedcfbadabc08f	176	Gene3D	G3DSA:2.30.30.50		122	166	1.7E-23	T	2017-08-01									GO:0004743	pyruvate kinase activity	F	Molecular function
Leaf	CL1353Contig3_18	c48442bc76ae00bb6887a40fc6f65924	154	Pfam	PF06212	GRIM-19 protein	31	149	9.6E-42	T	2017-08-01	IPR009346	GRIM-19							GO:0005515	protein binding	F	Molecular function
Leaf	CL1669Contig2_30	8a6813f24732370347b4306a55d677c3	216	Pfam	PF14382	Exosome complex exonuclease RRP4 N-terminal region	24	65	1.4E-8	T	2017-08-01	IPR025721	Exosome complex component, N-terminal domain							GO:0005524	ATP binding	F	Molecular function
Leaf	CL1669Contig2_30	8a6813f24732370347b4306a55d677c3	216	Pfam	PF10447	Exosome component EXOSC1/CSL4	121	162	5.8E-12	T	2017-08-01	IPR019495	Exosome complex component CSL4	GO:0000178|GO:0003723						GO:0005840	ribosome	C	cellular component
Leaf	CL1669Contig2_30	8a6813f24732370347b4306a55d677c3	216	SUPERFAMILY	SSF50249		91	211	4.48E-34	T	2017-08-01	IPR012340	Nucleic acid-binding, OB-fold							GO:0005975	carbohydrate metabolic process	P	Biological process
Leaf	CL17529Contig1_5	b42b2ab3c09ef9859ef31a8ae06f0a6c	112	SUPERFAMILY	SSF57850		66	100	4.08E-11	T	2017-08-01									GO:0006096	glycolytic process	P	Biological process
Leaf	CL17529Contig1_5	b42b2ab3c09ef9859ef31a8ae06f0a6c	112	Pfam	PF13639	Ring finger domain	66	100	1.1E-7	T	2017-08-01	IPR001841	Zinc finger, RING-type	GO:0005515|GO:0008270						GO:0006306	DNA methylation	P	Biological process
Leaf	CL17529Contig1_5	b42b2ab3c09ef9859ef31a8ae06f0a6c	112	ProSiteProfiles	PS50089	Zinc finger RING-type profile.	67	97	8.609	T	2017-08-01	IPR001841	Zinc finger, RING-type	GO:0005515|GO:0008270						GO:0006351	transcription, DNA-templated	P	Biological process
Leaf	CL17529Contig1_5	b42b2ab3c09ef9859ef31a8ae06f0a6c	112	Gene3D	G3DSA:3.30.40.10		64	100	4.1E-10	T	2017-08-01	IPR013083	Zinc finger, RING/FYVE/PHD-type							GO:0006355	regulation of transcription, DNA-templated	P	Biological process
Leaf	CL2302Contig1_2	d543cb6f5a7b5bdc0e1e07269857b657	29	Coils	Coil		28	29	-	T	2017-08-01									GO:0006412	translation	P	Biological process
Leaf	CL2302Contig1_50	f1f1f4c562c3f68f734c91d0887506ca	338	Gene3D	G3DSA:3.30.70.330		97	206	1.7E-30	T	2017-08-01	IPR012677	Nucleotide-binding alpha-beta plait domain	GO:0000166						GO:0006468	protein phosphorylation	P	Biological process
Leaf	CL2302Contig1_50	f1f1f4c562c3f68f734c91d0887506ca	338	SUPERFAMILY	SSF54928		130	311	7.51E-50	T	2017-08-01	IPR012677	Nucleotide-binding alpha-beta plait domain	GO:0000166						GO:0006508	proteolysis	P	Biological process
Leaf	CL2302Contig1_50	f1f1f4c562c3f68f734c91d0887506ca	338	SMART	SM00360		234	307	3.4E-24	T	2017-08-01	IPR000504	RNA recognition motif domain	GO:0003676						GO:0008234	cysteine-type peptidase activity	F	Molecular function
Leaf	CL2302Contig1_50	f1f1f4c562c3f68f734c91d0887506ca	338	SMART	SM00360		131	204	1.2E-28	T	2017-08-01	IPR000504	RNA recognition motif domain	GO:0003676						GO:0008270	zinc ion binding	F	Molecular function
Leaf	CL2302Contig1_50	f1f1f4c562c3f68f734c91d0887506ca	338	ProSiteProfiles	PS50102	Eukaryotic RNA Recognition Motif (RRM) profile.	233	311	18.103	T	2017-08-01	IPR000504	RNA recognition motif domain	GO:0003676						GO:0009522	photosystem I	C	cellular component
Leaf	CL2302Contig1_50	f1f1f4c562c3f68f734c91d0887506ca	338	Gene3D	G3DSA:3.30.70.330		230	314	1.5E-23	T	2017-08-01	IPR012677	Nucleotide-binding alpha-beta plait domain	GO:0000166						GO:0009538	photosystem I reaction center	C	cellular component
Leaf	CL2302Contig1_50	f1f1f4c562c3f68f734c91d0887506ca	338	ProSiteProfiles	PS50102	Eukaryotic RNA Recognition Motif (RRM) profile.	130	208	19.928	T	2017-08-01	IPR000504	RNA recognition motif domain	GO:0003676						GO:0015979	photosynthesis	P	Biological process
Leaf	CL2302Contig1_50	f1f1f4c562c3f68f734c91d0887506ca	338	Pfam	PF00076	RNA recognition motif. (a.k.a. RRM, RBD, or RNP domain)	132	202	5.6E-22	T	2017-08-01	IPR000504	RNA recognition motif domain	GO:0003676						GO:0030955	potassium ion binding	F	Molecular function
Leaf	CL2302Contig1_50	f1f1f4c562c3f68f734c91d0887506ca	338	Pfam	PF00076	RNA recognition motif. (a.k.a. RRM, RBD, or RNP domain)	235	305	7.6E-18	T	2017-08-01	IPR000504	RNA recognition motif domain	GO:0003676						GO:0042393	histone binding	F	Molecular function
Leaf	CL2598Contig2_24	d5abfc660d1f59ac95dd378d2721f0f8	201	Gene3D	G3DSA:3.40.50.150		77	195	1.3E-19	T	2017-08-01	IPR029063	S-adenosyl-L-methionine-dependent methyltransferase							GO:0043169	cation binding	F	Molecular function
Leaf	CL2598Contig2_24	d5abfc660d1f59ac95dd378d2721f0f8	201	Pfam	PF00145	C-5 cytosine-specific DNA methylase	78	192	2.4E-12	T	2017-08-01	IPR029063	S-adenosyl-L-methionine-dependent methyltransferase							GO:0046872	metal ion binding	F	Molecular function
Leaf	CL2598Contig2_24	d5abfc660d1f59ac95dd378d2721f0f8	201	SUPERFAMILY	SSF53335		78	193	2.02E-18	T	2017-08-01	IPR029063	S-adenosyl-L-methionine-dependent methyltransferase
Leaf	CL2598Contig2_24	d5abfc660d1f59ac95dd378d2721f0f8	201	SUPERFAMILY	SSF53335		9	75	4.87E-8	T	2017-08-01	IPR029063	S-adenosyl-L-methionine-dependent methyltransferase
Leaf	CL2598Contig2_24	d5abfc660d1f59ac95dd378d2721f0f8	201	ProSiteProfiles	PS51680	SAM-dependent methyltransferase DRM-type domain profile.	1	201	77.061	T	2017-08-01	IPR030380	SAM-dependent methyltransferase DRM	GO:0006306
Leaf	CL2784Contig1_8	78ec6fe86240119c7570cf751b0cb3c9	221	SUPERFAMILY	SSF57903		156	218	4.87E-18	T	2017-08-01	IPR011011	Zinc finger, FYVE/PHD-type
Leaf	CL2784Contig1_8	78ec6fe86240119c7570cf751b0cb3c9	221	Pfam	PF12165	Domain of unknown function (DUF3594)	1	105	2.0E-53	T	2017-08-01	IPR021998	Alfin	GO:0006355|GO:0042393
Leaf	CL2784Contig1_8	78ec6fe86240119c7570cf751b0cb3c9	221	SMART	SM00249		167	215	3.8E-9	T	2017-08-01	IPR001965	Zinc finger, PHD-type	GO:0005515|GO:0008270
Leaf	CL2784Contig1_8	78ec6fe86240119c7570cf751b0cb3c9	221	ProSitePatterns	PS01359	Zinc finger PHD-type signature.	168	214	-	T	2017-08-01	IPR019786	Zinc finger, PHD-type, conserved site
Leaf	CL2784Contig1_8	78ec6fe86240119c7570cf751b0cb3c9	221	Gene3D	G3DSA:3.30.40.10		160	217	3.3E-17	T	2017-08-01	IPR013083	Zinc finger, RING/FYVE/PHD-type
Leaf	CL2784Contig1_8	78ec6fe86240119c7570cf751b0cb3c9	221	ProSiteProfiles	PS50016	Zinc finger PHD-type profile.	165	217	9.419	T	2017-08-01	IPR019787	Zinc finger, PHD-finger	GO:0005515
Leaf	CL2784Contig1_8	78ec6fe86240119c7570cf751b0cb3c9	221	Pfam	PF00628	PHD-finger	168	215	1.9E-10	T	2017-08-01	IPR019787	Zinc finger, PHD-finger	GO:0005515
Leaf	CL3490Contig1_3	8ea5f658898c1d4dc52edacf807d056b	59	Gene3D	G3DSA:3.40.1380.20		1	58	1.2E-10	T	2017-08-01	IPR015794	Pyruvate kinase, alpha/beta	GO:0000287|GO:0004743|GO:0006096|GO:0030955
Leaf	CL3490Contig1_3	8ea5f658898c1d4dc52edacf807d056b	59	Pfam	PF02887	Pyruvate kinase, alpha/beta domain	1	50	1.0E-6	T	2017-08-01	IPR015795	Pyruvate kinase, C-terminal
Leaf	CL3490Contig1_3	8ea5f658898c1d4dc52edacf807d056b	59	SUPERFAMILY	SSF52935		1	57	2.2E-10	T	2017-08-01	IPR015795	Pyruvate kinase, C-terminal
Leaf	CL3539Contig2_21	ab251cdb8ec97c9de89a18fc6d931152	139	Pfam	PF01096	Transcription factor S-II (TFIIS)	100	138	1.0E-10	T	2017-08-01	IPR001222	Zinc finger, TFIIS-type	GO:0003676|GO:0006351|GO:0008270
Leaf	CL3539Contig2_21	ab251cdb8ec97c9de89a18fc6d931152	139	Pfam	PF02150	RNA polymerases M/15 Kd subunit	29	60	3.1E-12	T	2017-08-01	IPR001529	DNA-directed RNA polymerase, M/15kDa subunit	GO:0006351
Leaf	CL3539Contig2_21	ab251cdb8ec97c9de89a18fc6d931152	139	ProSiteProfiles	PS51133	Zinc finger TFIIS-type profile.	97	138	12.796	T	2017-08-01	IPR001222	Zinc finger, TFIIS-type	GO:0003676|GO:0006351|GO:0008270
Leaf	CL3539Contig2_21	ab251cdb8ec97c9de89a18fc6d931152	139	ProSitePatterns	PS01030	RNA polymerases M / 15 Kd subunits signature.	31	57	-	T	2017-08-01	IPR019761	DNA-directed RNA polymerase M, 15kDa subunit, conserved site
Leaf	CL3539Contig2_21	ab251cdb8ec97c9de89a18fc6d931152	139	SMART	SM00440		99	139	1.1E-6	T	2017-08-01	IPR001222	Zinc finger, TFIIS-type	GO:0003676|GO:0006351|GO:0008270
Leaf	CL3539Contig2_21	ab251cdb8ec97c9de89a18fc6d931152	139	SMART	SM00661		30	83	4.7E-17	T	2017-08-01	IPR001529	DNA-directed RNA polymerase, M/15kDa subunit	GO:0006351
Leaf	CL3539Contig2_21	ab251cdb8ec97c9de89a18fc6d931152	139	Gene3D	G3DSA:2.20.25.10		73	139	1.2E-25	T	2017-08-01
Leaf	CL3539Contig2_21	ab251cdb8ec97c9de89a18fc6d931152	139	SUPERFAMILY	SSF57783		76	139	7.65E-17	T	2017-08-01
Leaf	CL3539Contig2_21	ab251cdb8ec97c9de89a18fc6d931152	139	Gene3D	G3DSA:2.20.25.10		26	71	5.1E-26	T	2017-08-01
Leaf	CL3539Contig2_21	ab251cdb8ec97c9de89a18fc6d931152	139	SUPERFAMILY	SSF57783		26	73	1.63E-18	T	2017-08-01
Leaf	CL3588Contig2_20	7d4ab382063d4337f516774799e4415d	102	TIGRFAM	TIGR01589	A_thal_3526: uncharacterized plant-specific domain TIGR01589	17	72	1.9E-25	T	2017-08-01	IPR006476	Conserved hypothetical protein CHP01589, plant
Leaf	CL3588Contig2_20	7d4ab382063d4337f516774799e4415d	102	Pfam	PF09713	Plant protein 1589 of unknown function (A_thal_3526)	20	71	2.0E-27	T	2017-08-01	IPR006476	Conserved hypothetical protein CHP01589, plant
Leaf	CL3588Contig2_20	7d4ab382063d4337f516774799e4415d	102	Coils	Coil		97	102	-	T	2017-08-01
Leaf	CL3668Contig1_6	741cdf9fde7526dd6450afe968d91032	261	SUPERFAMILY	SSF51445		14	67	1.66E-5	T	2017-08-01	IPR017853	Glycoside hydrolase superfamily
Leaf	CL3668Contig1_6	741cdf9fde7526dd6450afe968d91032	261	Gene3D	G3DSA:2.60.40.1180		81	182	2.8E-19	T	2017-08-01	IPR013780	Glycosyl hydrolase, all-beta
Leaf	CL3668Contig1_6	741cdf9fde7526dd6450afe968d91032	261	Pfam	PF02806	Alpha amylase, C-terminal all-beta domain	84	182	1.2E-25	T	2017-08-01	IPR006048	Alpha-amylase/branching enzyme, C-terminal all beta	GO:0003824|GO:0005975|GO:0043169
Leaf	CL3668Contig1_6	741cdf9fde7526dd6450afe968d91032	261	SUPERFAMILY	SSF51011		80	185	4.03E-23	T	2017-08-01
Leaf	CL3687Contig2_22	9f83a1174ec4f51e2b6e4bfe239a10f8	117	ProSiteProfiles	PS50011	Protein kinase domain profile.	1	117	24.414	T	2017-08-01	IPR000719	Protein kinase domain	GO:0004672|GO:0005524|GO:0006468
Leaf	CL3687Contig2_22	9f83a1174ec4f51e2b6e4bfe239a10f8	117	SMART	SM00220		3	117	6.2E-6	T	2017-08-01	IPR000719	Protein kinase domain	GO:0004672|GO:0005524|GO:0006468
Leaf	CL3687Contig2_22	9f83a1174ec4f51e2b6e4bfe239a10f8	117	Gene3D	G3DSA:3.30.200.20		3	71	9.2E-15	T	2017-08-01
Leaf	CL3687Contig2_22	9f83a1174ec4f51e2b6e4bfe239a10f8	117	Pfam	PF00069	Protein kinase domain	3	115	8.5E-32	T	2017-08-01	IPR000719	Protein kinase domain	GO:0004672|GO:0005524|GO:0006468
Leaf	CL3687Contig2_22	9f83a1174ec4f51e2b6e4bfe239a10f8	117	SUPERFAMILY	SSF56112		5	115	1.01E-35	T	2017-08-01	IPR011009	Protein kinase-like domain
Leaf	CL3687Contig2_22	9f83a1174ec4f51e2b6e4bfe239a10f8	117	Coils	Coil		117	117	-	T	2017-08-01
Leaf	CL3687Contig2_22	9f83a1174ec4f51e2b6e4bfe239a10f8	117	ProSitePatterns	PS00108	Serine/Threonine protein kinases active-site signature.	93	105	-	T	2017-08-01	IPR008271	Serine/threonine-protein kinase, active site	GO:0004672|GO:0006468
Leaf	CL3687Contig2_22	9f83a1174ec4f51e2b6e4bfe239a10f8	117	Gene3D	G3DSA:1.10.510.10		72	116	2.9E-21	T	2017-08-01
Leaf	CL3687Contig2_27	f9dfcf19314553ad3f354d05723070b3	145	SMART	SM00220		1	137	2.6E-4	T	2017-08-01	IPR000719	Protein kinase domain	GO:0004672|GO:0005524|GO:0006468
Leaf	CL3687Contig2_27	f9dfcf19314553ad3f354d05723070b3	145	SUPERFAMILY	SSF56112		17	139	2.82E-29	T	2017-08-01	IPR011009	Protein kinase-like domain
Leaf	CL3687Contig2_27	f9dfcf19314553ad3f354d05723070b3	145	Gene3D	G3DSA:1.10.510.10		17	141	7.6E-27	T	2017-08-01
Leaf	CL3687Contig2_27	f9dfcf19314553ad3f354d05723070b3	145	ProSiteProfiles	PS50011	Protein kinase domain profile.	1	137	17.404	T	2017-08-01	IPR000719	Protein kinase domain	GO:0004672|GO:0005524|GO:0006468
Leaf	CL3687Contig2_27	f9dfcf19314553ad3f354d05723070b3	145	Pfam	PF00069	Protein kinase domain	17	137	5.9E-19	T	2017-08-01	IPR000719	Protein kinase domain	GO:0004672|GO:0005524|GO:0006468
Leaf	CL403Contig1_30	bd2e9aed88c5697db15ab97582aa173d	156	ProSiteProfiles	PS50127	Ubiquitin-conjugating enzymes family profile.	26	143	16.979	T	2017-08-01	IPR000608	Ubiquitin-conjugating enzyme E2
Leaf	CL403Contig1_30	bd2e9aed88c5697db15ab97582aa173d	156	SUPERFAMILY	SSF54495		21	156	6.23E-38	T	2017-08-01	IPR016135	Ubiquitin-conjugating enzyme/RWD-like
Leaf	CL403Contig1_30	bd2e9aed88c5697db15ab97582aa173d	156	Gene3D	G3DSA:3.10.110.10		20	154	1.9E-36	T	2017-08-01	IPR016135	Ubiquitin-conjugating enzyme/RWD-like
Leaf	CL403Contig1_30	bd2e9aed88c5697db15ab97582aa173d	156	Pfam	PF00179	Ubiquitin-conjugating enzyme	53	146	3.0E-14	T	2017-08-01	IPR000608	Ubiquitin-conjugating enzyme E2
Leaf	CL403Contig1_30	bd2e9aed88c5697db15ab97582aa173d	156	SMART	SM00212		26	154	1.5E-4	T	2017-08-01
Leaf	CL4138Contig2_31	ac25ed3473ee761bf035e5c1d2283720	238	Pfam	PF10604	Polyketide cyclase / dehydrase and lipid transport	79	217	3.1E-18	T	2017-08-01	IPR019587	Polyketide cyclase/dehydrase
Leaf	CL4138Contig2_31	ac25ed3473ee761bf035e5c1d2283720	238	SUPERFAMILY	SSF55961		77	218	2.45E-36	T	2017-08-01
Leaf	CL4138Contig2_31	ac25ed3473ee761bf035e5c1d2283720	238	Gene3D	G3DSA:3.30.530.20		63	221	5.6E-57	T	2017-08-01	IPR023393	START-like domain
Leaf	CL4396Contig2_18	c242a9da91e6722faa08e5b2315c501f	76	Pfam	PF12159	Protein of unknown function (DUF3593)	2	50	1.3E-21	T	2017-08-01	IPR021995	Protein of unknown function DUF3593
Leaf	CL4667Contig1_12	85af3f9686a52c50a16c6a06114549de	196	SUPERFAMILY	SSF50985		6	188	6.67E-50	T	2017-08-01	IPR009091	Regulator of chromosome condensation 1/beta-lactamase-inhibitor protein II
Leaf	CL4667Contig1_12	85af3f9686a52c50a16c6a06114549de	196	Gene3D	G3DSA:2.130.10.30		6	188	3.0E-53	T	2017-08-01	IPR009091	Regulator of chromosome condensation 1/beta-lactamase-inhibitor protein II
Leaf	CL4667Contig1_12	85af3f9686a52c50a16c6a06114549de	196	ProSitePatterns	PS00626	Regulator of chromosome condensation (RCC1) signature 2.	176	186	-	T	2017-08-01	IPR000408	Regulator of chromosome condensation, RCC1
Leaf	CL4667Contig1_12	85af3f9686a52c50a16c6a06114549de	196	ProSiteProfiles	PS50012	Regulator of chromosome condensation (RCC1) repeat profile.	125	189	12.554	T	2017-08-01	IPR000408	Regulator of chromosome condensation, RCC1
Leaf	CL4667Contig1_12	85af3f9686a52c50a16c6a06114549de	196	PRINTS	PR00633	Chromosome condensation regulator RCC1 signature	127	141	4.8E-8	T	2017-08-01	IPR000408	Regulator of chromosome condensation, RCC1
Leaf	CL4667Contig1_12	85af3f9686a52c50a16c6a06114549de	196	PRINTS	PR00633	Chromosome condensation regulator RCC1 signature	111	127	4.8E-8	T	2017-08-01	IPR000408	Regulator of chromosome condensation, RCC1
Leaf	CL4667Contig1_12	85af3f9686a52c50a16c6a06114549de	196	PRINTS	PR00633	Chromosome condensation regulator RCC1 signature	21	37	4.8E-8	T	2017-08-01	IPR000408	Regulator of chromosome condensation, RCC1
Leaf	CL4667Contig1_12	85af3f9686a52c50a16c6a06114549de	196	PRINTS	PR00633	Chromosome condensation regulator RCC1 signature	71	87	4.8E-8	T	2017-08-01	IPR000408	Regulator of chromosome condensation, RCC1
Leaf	CL4667Contig1_12	85af3f9686a52c50a16c6a06114549de	196	ProSiteProfiles	PS50012	Regulator of chromosome condensation (RCC1) repeat profile.	71	124	19.348	T	2017-08-01	IPR000408	Regulator of chromosome condensation, RCC1
Leaf	CL4667Contig1_12	85af3f9686a52c50a16c6a06114549de	196	Pfam	PF00415	Regulator of chromosome condensation (RCC1) repeat	18	66	2.3E-14	T	2017-08-01	IPR000408	Regulator of chromosome condensation, RCC1
Leaf	CL4667Contig1_12	85af3f9686a52c50a16c6a06114549de	196	Pfam	PF00415	Regulator of chromosome condensation (RCC1) repeat	124	186	5.2E-12	T	2017-08-01	IPR000408	Regulator of chromosome condensation, RCC1
Leaf	CL4667Contig1_12	85af3f9686a52c50a16c6a06114549de	196	Pfam	PF00415	Regulator of chromosome condensation (RCC1) repeat	70	121	1.5E-17	T	2017-08-01	IPR000408	Regulator of chromosome condensation, RCC1
Leaf	CL4667Contig1_12	85af3f9686a52c50a16c6a06114549de	196	ProSiteProfiles	PS50012	Regulator of chromosome condensation (RCC1) repeat profile.	19	70	16.373	T	2017-08-01	IPR000408	Regulator of chromosome condensation, RCC1
Leaf	CL4667Contig1_3	613aa0f32e1daa1293fad97f0d6b5ec3	77	Gene3D	G3DSA:2.130.10.30		25	74	2.7E-7	T	2017-08-01	IPR009091	Regulator of chromosome condensation 1/beta-lactamase-inhibitor protein II
Leaf	CL4667Contig1_3	613aa0f32e1daa1293fad97f0d6b5ec3	77	SUPERFAMILY	SSF50985		25	73	5.89E-8	T	2017-08-01	IPR009091	Regulator of chromosome condensation 1/beta-lactamase-inhibitor protein II
Leaf	CL4729Contig1_22	9839e7934dd899db714c9d1e17f72375	180	Pfam	PF00642	Zinc finger C-x8-C-x5-C-x3-H type (and similar)	157	180	4.9E-6	T	2017-08-01	IPR000571	Zinc finger, CCCH-type	GO:0046872
Leaf	CL4729Contig1_22	9839e7934dd899db714c9d1e17f72375	180	Gene3D	G3DSA:4.10.1000.10		159	179	3.1E-5	T	2017-08-01	IPR000571	Zinc finger, CCCH-type	GO:0046872
Leaf	CL4729Contig1_22	9839e7934dd899db714c9d1e17f72375	180	SUPERFAMILY	SSF90229		156	179	2.35E-7	T	2017-08-01	IPR000571	Zinc finger, CCCH-type	GO:0046872
Leaf	CL4729Contig1_22	9839e7934dd899db714c9d1e17f72375	180	ProSiteProfiles	PS50103	Zinc finger C3H1-type profile.	155	180	15.065	T	2017-08-01	IPR000571	Zinc finger, CCCH-type	GO:0046872
Leaf	CL4856Contig1_12	7736982dcf4d582b6b1b63a1ff32db37	29	Coils	Coil		2	22	-	T	2017-08-01
Leaf	CL4856Contig1_15	47daf22ad07ea48d03aa1a886e099e02	90	Coils	Coil		28	48	-	T	2017-08-01
Leaf	CL6628Contig1_11	52cee7562bff94e134e360c75f0c2583	161	Gene3D	G3DSA:3.30.710.10		5	66	6.3E-8	T	2017-08-01
Leaf	CL6628Contig1_11	52cee7562bff94e134e360c75f0c2583	161	Pfam	PF00651	BTB/POZ domain	6	64	4.0E-5	T	2017-08-01	IPR000210	BTB/POZ domain	GO:0005515
Leaf	CL6628Contig1_11	52cee7562bff94e134e360c75f0c2583	161	SUPERFAMILY	SSF54695		4	66	1.15E-6	T	2017-08-01	IPR011333	SKP1/BTB/POZ domain
Leaf	CL6628Contig1_4	a929e8af7c185294dfe57abcb5331e56	83	SUPERFAMILY	SSF54695		17	81	6.8E-14	T	2017-08-01	IPR011333	SKP1/BTB/POZ domain
Leaf	CL6628Contig1_4	a929e8af7c185294dfe57abcb5331e56	83	Gene3D	G3DSA:3.30.710.10		17	75	1.9E-15	T	2017-08-01
Leaf	CL6628Contig1_4	a929e8af7c185294dfe57abcb5331e56	83	Pfam	PF00651	BTB/POZ domain	32	73	8.6E-11	T	2017-08-01	IPR000210	BTB/POZ domain	GO:0005515
Leaf	CL6628Contig1_4	a929e8af7c185294dfe57abcb5331e56	83	ProSiteProfiles	PS50097	BTB domain profile.	39	83	13.053	T	2017-08-01	IPR000210	BTB/POZ domain	GO:0005515
Leaf	CL9514Contig1_13	12d7f4c7f56be800a300a8b30131ceef	41	Coils	Coil		8	28	-	T	2017-08-01
Leaf	CL9514Contig1_2	616e1caa8e83749f5f54da849a3594f5	19	ProSiteProfiles	PS51436	Potyvirus NIa protease (NIa-pro) domain profile.	1	19	10.741	T	2017-08-01	IPR001730	Potyvirus NIa protease (NIa-pro) domain	GO:0006508|GO:0008234
Leaf	CL9514Contig1_7	cb2e903bb33c3c5baa0373af5a569137	181	Pfam	PF00168	C2 domain	1	56	5.5E-7	T	2017-08-01	IPR000008	C2 domain	GO:0005515
Leaf	CL9514Contig1_7	cb2e903bb33c3c5baa0373af5a569137	181	Pfam	PF00168	C2 domain	92	175	5.9E-17	T	2017-08-01	IPR000008	C2 domain	GO:0005515
Leaf	CL9514Contig1_7	cb2e903bb33c3c5baa0373af5a569137	181	SUPERFAMILY	SSF49562		1	69	2.23E-12	T	2017-08-01	IPR000008	C2 domain	GO:0005515
Leaf	CL9514Contig1_7	cb2e903bb33c3c5baa0373af5a569137	181	SUPERFAMILY	SSF49562		88	178	8.63E-22	T	2017-08-01	IPR000008	C2 domain	GO:0005515
Leaf	CL9514Contig1_7	cb2e903bb33c3c5baa0373af5a569137	181	Gene3D	G3DSA:2.60.40.150		88	178	1.0E-21	T	2017-08-01	IPR000008	C2 domain	GO:0005515
Leaf	CL9514Contig1_7	cb2e903bb33c3c5baa0373af5a569137	181	PRINTS	PR00360	C2 domain signature	130	143	8.2E-5	T	2017-08-01	IPR000008	C2 domain	GO:0005515
Leaf	CL9514Contig1_7	cb2e903bb33c3c5baa0373af5a569137	181	PRINTS	PR00360	C2 domain signature	106	118	8.2E-5	T	2017-08-01	IPR000008	C2 domain	GO:0005515
Leaf	CL9514Contig1_7	cb2e903bb33c3c5baa0373af5a569137	181	ProSiteProfiles	PS50004	C2 domain profile.	91	169	12.528	T	2017-08-01	IPR000008	C2 domain	GO:0005515
Leaf	CL9514Contig1_7	cb2e903bb33c3c5baa0373af5a569137	181	Gene3D	G3DSA:2.60.40.150		1	69	8.6E-12	T	2017-08-01	IPR000008	C2 domain	GO:0005515
Leaf	CL9514Contig1_7	cb2e903bb33c3c5baa0373af5a569137	181	SMART	SM00239		90	178	4.2E-11	T	2017-08-01	IPR000008	C2 domain	GO:0005515
																				GO term root
root	CL5302Contig1_20	f207c700576de41cc8ac2fe336ad5735	468	SUPERFAMILY	SSF81665		49	153	4.84E-10	T	2017-08-01									GO:0000166	nucleotide binding	F	Molecular function
root	CL5302Contig1_20	f207c700576de41cc8ac2fe336ad5735	468	TIGRFAM	TIGR01525	ATPase-IB_hvy: heavy metal translocating P-type ATPase	1	467	7.2E-154	T	2017-08-01	IPR027256	P-type ATPase, subfamily IB	GO:0006812|GO:0016021|GO:0019829						GO:0004672	protein kinase activity	F	Molecular function
root	CL5302Contig1_20	f207c700576de41cc8ac2fe336ad5735	468	SUPERFAMILY	SSF56784		224	466	3.81E-54	T	2017-08-01	IPR023214	HAD-like domain							GO:0005515	protein binding	F	Molecular function
root	CL5302Contig1_20	f207c700576de41cc8ac2fe336ad5735	468	SUPERFAMILY	SSF56784		158	178	3.81E-54	T	2017-08-01	IPR023214	HAD-like domain							GO:0005524	ATP binding	F	Molecular function
root	CL5302Contig1_20	f207c700576de41cc8ac2fe336ad5735	468	Gene3D	G3DSA:3.40.50.1000		295	436	2.4E-55	T	2017-08-01	IPR023214	HAD-like domain							GO:0006468	protein phosphorylation	P	Biological process
root	CL5302Contig1_20	f207c700576de41cc8ac2fe336ad5735	468	Gene3D	G3DSA:3.40.50.1000		131	174	2.4E-55	T	2017-08-01	IPR023214	HAD-like domain							GO:0006812	cation transport	P	Biological process
root	CL5302Contig1_20	f207c700576de41cc8ac2fe336ad5735	468	ProSitePatterns	PS00154	E1-E2 ATPases phosphorylation site.	162	168	-	T	2017-08-01	IPR018303	P-type ATPase, phosphorylation site							GO:0007049	cell cycle	P	Biological process
root	CL5302Contig1_20	f207c700576de41cc8ac2fe336ad5735	468	Pfam	PF00122	E1-E2 ATPase	1	151	9.0E-38	T	2017-08-01	IPR008250	P-type ATPase, A domain	GO:0000166|GO:0046872						GO:0007165	signal transduction	P	Biological process
root	CL5302Contig1_20	f207c700576de41cc8ac2fe336ad5735	468	TIGRFAM	TIGR01494	ATPase_P-type: HAD ATPase, P-type, family IC	36	444	2.7E-61	T	2017-08-01	IPR001757	P-type ATPase	GO:0016021						GO:0016021	integral component of membrane	C	cellular component
root	CL5302Contig1_20	f207c700576de41cc8ac2fe336ad5735	468	PRINTS	PR00120	H+-transporting ATPase (proton pump) signature	398	423	8.2E-9	T	2017-08-01	IPR001757	P-type ATPase	GO:0016021						GO:0016887	ATPase activity	F	Molecular function
root	CL5302Contig1_20	f207c700576de41cc8ac2fe336ad5735	468	PRINTS	PR00120	H+-transporting ATPase (proton pump) signature	367	383	8.2E-9	T	2017-08-01	IPR001757	P-type ATPase	GO:0016021						GO:0017053	transcriptional repressor complex	C	cellular component
root	CL5302Contig1_20	f207c700576de41cc8ac2fe336ad5735	468	Gene3D	G3DSA:2.70.150.10		1	47	3.1E-7	T	2017-08-01	IPR008250	P-type ATPase, A domain	GO:0000166|GO:0046872						GO:0019829	cation-transporting ATPase activity	F	Molecular function
root	CL5302Contig1_20	f207c700576de41cc8ac2fe336ad5735	468	SUPERFAMILY	SSF81653		1	46	1.01E-7	T	2017-08-01									GO:0046872	metal ion binding	F	Molecular function
root	CL5302Contig1_20	f207c700576de41cc8ac2fe336ad5735	468	Pfam	PF00702	haloacid dehalogenase-like hydrolase	156	381	4.3E-45	T	2017-08-01
root	CL5302Contig1_20	f207c700576de41cc8ac2fe336ad5735	468	Gene3D	G3DSA:3.40.1110.10		175	294	3.2E-20	T	2017-08-01	IPR023299	P-type ATPase, cytoplasmic domain N	GO:0000166
root	CL5302Contig1_20	f207c700576de41cc8ac2fe336ad5735	468	PRINTS	PR00119	P-type cation-transporting ATPase superfamily signature	367	386	1.2E-24	T	2017-08-01
root	CL5302Contig1_20	f207c700576de41cc8ac2fe336ad5735	468	PRINTS	PR00119	P-type cation-transporting ATPase superfamily signature	292	303	1.2E-24	T	2017-08-01
root	CL5302Contig1_20	f207c700576de41cc8ac2fe336ad5735	468	PRINTS	PR00119	P-type cation-transporting ATPase superfamily signature	390	402	1.2E-24	T	2017-08-01
root	CL5302Contig1_20	f207c700576de41cc8ac2fe336ad5735	468	PRINTS	PR00119	P-type cation-transporting ATPase superfamily signature	160	174	1.2E-24	T	2017-08-01
root	CL5302Contig1_20	f207c700576de41cc8ac2fe336ad5735	468	PRINTS	PR00119	P-type cation-transporting ATPase superfamily signature	314	324	1.2E-24	T	2017-08-01
root	CL1249Contig1_26	2a836f5928197f6ddde7a8f36c9f27d7	192	Pfam	PF03822	NAF domain	61	120	3.6E-24	T	2017-08-01	IPR004041	NAF domain	GO:0007165
root	CL1249Contig1_26	2a836f5928197f6ddde7a8f36c9f27d7	192	Gene3D	G3DSA:3.30.310.80		93	177	1.5E-6	T	2017-08-01	IPR028375	KA1 domain/Ssp2, C-terminal
root	CL1249Contig1_26	2a836f5928197f6ddde7a8f36c9f27d7	192	ProSiteProfiles	PS50816	NAF domain profile.	59	83	12.977	T	2017-08-01	IPR018451	NAF/FISL domain	GO:0007165
root	CL1249Contig1_9	ec749d46846ca4cac72f6e2bab8c6644	61	ProSiteProfiles	PS50011	Protein kinase domain profile.	1	61	10.097	T	2017-08-01	IPR000719	Protein kinase domain	GO:0004672|GO:0005524|GO:0006468
root	CL1249Contig1_9	ec749d46846ca4cac72f6e2bab8c6644	61	Pfam	PF00069	Protein kinase domain	8	58	3.6E-9	T	2017-08-01	IPR000719	Protein kinase domain	GO:0004672|GO:0005524|GO:0006468
root	CL1249Contig1_9	ec749d46846ca4cac72f6e2bab8c6644	61	Gene3D	G3DSA:3.30.200.20		3	54	1.5E-14	T	2017-08-01
root	CL1249Contig1_9	ec749d46846ca4cac72f6e2bab8c6644	61	SUPERFAMILY	SSF56112		7	59	2.7E-11	T	2017-08-01	IPR011009	Protein kinase-like domain
root	CL5499Contig1_17	b0674d4b297f50084e5e9ae33a602221	57	PRINTS	PR00019	Leucine-rich repeat signature	27	40	8.0E-5	T	2017-08-01
root	CL5499Contig1_17	b0674d4b297f50084e5e9ae33a602221	57	PRINTS	PR00019	Leucine-rich repeat signature	6	19	8.0E-5	T	2017-08-01
root	CL5499Contig1_17	b0674d4b297f50084e5e9ae33a602221	57	SUPERFAMILY	SSF52058		2	47	5.33E-11	T	2017-08-01	IPR032675	Leucine-rich repeat domain, L domain-like
root	CL5499Contig1_17	b0674d4b297f50084e5e9ae33a602221	57	Gene3D	G3DSA:3.80.10.10		2	46	8.0E-13	T	2017-08-01	IPR032675	Leucine-rich repeat domain, L domain-like
root	CL5499Contig1_17	b0674d4b297f50084e5e9ae33a602221	57	Pfam	PF12799	Leucine Rich repeats (2 copies)	4	40	8.3E-7	T	2017-08-01	IPR025875	Leucine rich repeat 4
root	CL5499Contig1_16	319f8a7f33bf75fed456fff74d4916c7	391	SMART	SM00369		6	30	17.0	T	2017-08-01	IPR003591	Leucine-rich repeat, typical subtype
root	CL5499Contig1_16	319f8a7f33bf75fed456fff74d4916c7	391	SMART	SM00369		265	296	150.0	T	2017-08-01	IPR003591	Leucine-rich repeat, typical subtype
root	CL5499Contig1_16	319f8a7f33bf75fed456fff74d4916c7	391	SMART	SM00369		313	336	93.0	T	2017-08-01	IPR003591	Leucine-rich repeat, typical subtype
root	CL5499Contig1_16	319f8a7f33bf75fed456fff74d4916c7	391	SMART	SM00369		175	198	100.0	T	2017-08-01	IPR003591	Leucine-rich repeat, typical subtype
root	CL5499Contig1_16	319f8a7f33bf75fed456fff74d4916c7	391	SMART	SM00369		199	223	71.0	T	2017-08-01	IPR003591	Leucine-rich repeat, typical subtype
root	CL5499Contig1_16	319f8a7f33bf75fed456fff74d4916c7	391	SMART	SM00369		79	103	30.0	T	2017-08-01	IPR003591	Leucine-rich repeat, typical subtype
root	CL5499Contig1_16	319f8a7f33bf75fed456fff74d4916c7	391	Pfam	PF00560	Leucine Rich Repeat	82	101	1.1	T	2017-08-01	IPR001611	Leucine-rich repeat	GO:0005515
root	CL5499Contig1_16	319f8a7f33bf75fed456fff74d4916c7	391	Pfam	PF13516	Leucine Rich repeat	360	376	0.39	T	2017-08-01	IPR001611	Leucine-rich repeat	GO:0005515
root	CL5499Contig1_16	319f8a7f33bf75fed456fff74d4916c7	391	Pfam	PF13855	Leucine rich repeat	156	212	5.5E-8	T	2017-08-01	IPR001611	Leucine-rich repeat	GO:0005515
root	CL5499Contig1_16	319f8a7f33bf75fed456fff74d4916c7	391	Pfam	PF13855	Leucine rich repeat	8	68	9.6E-10	T	2017-08-01	IPR001611	Leucine-rich repeat	GO:0005515
root	CL5499Contig1_16	319f8a7f33bf75fed456fff74d4916c7	391	PRINTS	PR00019	Leucine-rich repeat signature	178	191	5.0E-5	T	2017-08-01
root	CL5499Contig1_16	319f8a7f33bf75fed456fff74d4916c7	391	PRINTS	PR00019	Leucine-rich repeat signature	265	278	5.0E-5	T	2017-08-01
root	CL5499Contig1_16	319f8a7f33bf75fed456fff74d4916c7	391	Gene3D	G3DSA:3.80.10.10		256	384	4.6E-36	T	2017-08-01	IPR032675	Leucine-rich repeat domain, L domain-like
root	CL5499Contig1_16	319f8a7f33bf75fed456fff74d4916c7	391	Gene3D	G3DSA:3.80.10.10		4	249	4.5E-69	T	2017-08-01	IPR032675	Leucine-rich repeat domain, L domain-like
root	CL5499Contig1_16	319f8a7f33bf75fed456fff74d4916c7	391	SUPERFAMILY	SSF52058		3	249	4.08E-59	T	2017-08-01	IPR032675	Leucine-rich repeat domain, L domain-like
root	CL5499Contig1_16	319f8a7f33bf75fed456fff74d4916c7	391	SUPERFAMILY	SSF52058		263	380	1.03E-30	T	2017-08-01	IPR032675	Leucine-rich repeat domain, L domain-like
root	CL1447Contig3_19	a8d0d0c61e8d0517da17c0e03f8df802	508	SMART	SM00382		151	489	2.5E-8	T	2017-08-01	IPR003593	AAA+ ATPase domain
root	CL1447Contig3_19	a8d0d0c61e8d0517da17c0e03f8df802	508	ProSitePatterns	PS00211	ABC transporters family signature.	289	303	-	T	2017-08-01	IPR017871	ABC transporter, conserved site	GO:0005524|GO:0016887
root	CL1447Contig3_19	a8d0d0c61e8d0517da17c0e03f8df802	508	Gene3D	G3DSA:3.40.50.300		451	505	1.8E-10	T	2017-08-01	IPR027417	P-loop containing nucleoside triphosphate hydrolase
root	CL1447Contig3_19	a8d0d0c61e8d0517da17c0e03f8df802	508	SUPERFAMILY	SSF52540		434	505	3.52E-10	T	2017-08-01	IPR027417	P-loop containing nucleoside triphosphate hydrolase
root	CL1447Contig3_19	a8d0d0c61e8d0517da17c0e03f8df802	508	SUPERFAMILY	SSF52540		127	370	1.27E-46	T	2017-08-01	IPR027417	P-loop containing nucleoside triphosphate hydrolase
root	CL1447Contig3_19	a8d0d0c61e8d0517da17c0e03f8df802	508	Pfam	PF12848	ABC transporter	356	441	3.4E-20	T	2017-08-01	IPR032781	ABC-transporter extension domain
root	CL1447Contig3_19	a8d0d0c61e8d0517da17c0e03f8df802	508	Gene3D	G3DSA:3.40.50.300		127	214	1.5E-51	T	2017-08-01	IPR027417	P-loop containing nucleoside triphosphate hydrolase
root	CL1447Contig3_19	a8d0d0c61e8d0517da17c0e03f8df802	508	Gene3D	G3DSA:3.40.50.300		252	399	1.5E-51	T	2017-08-01	IPR027417	P-loop containing nucleoside triphosphate hydrolase
root	CL1447Contig3_19	a8d0d0c61e8d0517da17c0e03f8df802	508	ProSiteProfiles	PS50893	ATP-binding cassette, ABC transporter-type domain profile.	127	385	18.588	T	2017-08-01	IPR003439	ABC transporter-like	GO:0005524|GO:0016887
root	CL1447Contig3_19	a8d0d0c61e8d0517da17c0e03f8df802	508	Pfam	PF00005	ABC transporter	142	317	2.5E-24	T	2017-08-01	IPR003439	ABC transporter-like	GO:0005524|GO:0016887
root	CL1249Contig1_14	c78ff9e2586b3bdf9db4c575bcef3608	91	ProSiteProfiles	PS50011	Protein kinase domain profile.	1	91	13.15	T	2017-08-01	IPR000719	Protein kinase domain	GO:0004672|GO:0005524|GO:0006468
root	CL1249Contig1_14	c78ff9e2586b3bdf9db4c575bcef3608	91	Gene3D	G3DSA:1.10.510.10		20	69	3.8E-13	T	2017-08-01
root	CL1249Contig1_14	c78ff9e2586b3bdf9db4c575bcef3608	91	Pfam	PF00069	Protein kinase domain	20	66	6.8E-11	T	2017-08-01	IPR000719	Protein kinase domain	GO:0004672|GO:0005524|GO:0006468
root	CL1249Contig1_14	c78ff9e2586b3bdf9db4c575bcef3608	91	ProSitePatterns	PS00108	Serine/Threonine protein kinases active-site signature.	21	33	-	T	2017-08-01	IPR008271	Serine/threonine-protein kinase, active site	GO:0004672|GO:0006468
root	CL1249Contig1_14	c78ff9e2586b3bdf9db4c575bcef3608	91	SUPERFAMILY	SSF56112		20	66	4.59E-14	T	2017-08-01	IPR011009	Protein kinase-like domain
root	CL667Contig7_24	9ccb47157b89dfaf00d909db18901eb5	148	Pfam	PF04427	Brix domain	27	83	3.9E-9	T	2017-08-01	IPR007109	Brix domain
root	CL667Contig7_24	9ccb47157b89dfaf00d909db18901eb5	148	ProSiteProfiles	PS50833	Brix domain profile.	1	90	11.91	T	2017-08-01	IPR007109	Brix domain
root	CL6659Contig2_32	73d0fbc3de070e45e0428583fc127552	196	Pfam	PF15306	LIN37	69	180	9.9E-9	T	2017-08-01	IPR028226	Protein LIN37	GO:0007049|GO:0017053
root	CL1471Contig2_22	b09d60a2a3e9af442bb09810a3d78a67	446	ProSiteProfiles	PS50157	Zinc finger C2H2 type domain profile.	123	149	8.663	T	2017-08-01	IPR007087	Zinc finger, C2H2	GO:0046872
root	CL1471Contig2_22	b09d60a2a3e9af442bb09810a3d78a67	446	ProSitePatterns	PS00518	Zinc finger RING-type signature.	88	97	-	T	2017-08-01	IPR017907	Zinc finger, RING-type, conserved site
root	CL1471Contig2_22	b09d60a2a3e9af442bb09810a3d78a67	446	ProSitePatterns	PS00028	Zinc finger C2H2 type domain signature.	125	148	-	T	2017-08-01	IPR007087	Zinc finger, C2H2	GO:0046872
root	CL1249Contig1_5	41ab4678ab96b61f3f0e09c1a4001a05	58	ProSiteProfiles	PS50011	Protein kinase domain profile.	21	58	9.277	T	2017-08-01	IPR000719	Protein kinase domain	GO:0004672|GO:0005524|GO:0006468
root	CL1249Contig1_5	41ab4678ab96b61f3f0e09c1a4001a05	58	SUPERFAMILY	SSF56112		7	55	1.42E-10	T	2017-08-01	IPR011009	Protein kinase-like domain
root	CL1249Contig1_5	41ab4678ab96b61f3f0e09c1a4001a05	58	ProSitePatterns	PS00107	Protein kinases ATP-binding region signature.	27	50	-	T	2017-08-01	IPR017441	Protein kinase, ATP binding site	GO:0005524
root	CL1249Contig1_5	41ab4678ab96b61f3f0e09c1a4001a05	58	Gene3D	G3DSA:3.30.200.20		12	56	8.9E-15	T	2017-08-01
root	CL1249Contig1_17	dc3a2a61d678de63c33b3b1979a6752b	63	Gene3D	G3DSA:1.10.510.10		12	61	5.0E-15	T	2017-08-01
root	CL1249Contig1_17	dc3a2a61d678de63c33b3b1979a6752b	63	SUPERFAMILY	SSF56112		12	63	2.97E-15	T	2017-08-01	IPR011009	Protein kinase-like domain
root	CL1249Contig1_17	dc3a2a61d678de63c33b3b1979a6752b	63	Pfam	PF00069	Protein kinase domain	11	60	7.9E-12	T	2017-08-01	IPR000719	Protein kinase domain	GO:0004672|GO:0005524|GO:0006468
root	CL1249Contig1_17	dc3a2a61d678de63c33b3b1979a6752b	63	ProSiteProfiles	PS50011	Protein kinase domain profile.	1	63	11.51	T	2017-08-01	IPR000719	Protein kinase domain	GO:0004672|GO:0005524|GO:0006468
root	CL2148Contig2_8	4884bb079158b9dbeeb5934f4b900a35	186	Pfam	PF07944	Beta-L-arabinofuranosidase, GH127	1	183	2.7E-38	T	2017-08-01	IPR012878	Beta-L-arabinofuranosidase, GH127
root	CL1249Contig1_10	542b446dec345aa1aca0501894555c3c	43	Gene3D	G3DSA:3.30.200.20		11	39	4.4E-5	T	2017-08-01
root	CL3190Contig2_15	4d7dfe92c5fdb0d930bf77a9d28e452e	232	Coils	Coil		231	232	-	T	2017-08-01
