# Supplementary material for: Post-transcriptional regulation of several biological processes involved in latex production in Hevea brasiliensis
Source: PeerJ. 2020 Apr 29;8:e8932. doi: 10.7717/peerj.8932 (PMC7195832; doi:10.7717/peerj.8932)
Supplement: Table S9 [file peerj-08-8932-s009.xlsx]

## Sheet: 9.
CleaveLAnd output for genes involved in natural rubber biosynthesis and miRNA annotation
SiteID	Query	Annotation PNRD	Annotation mirBase	New annotation	Transcript	Transcript annotation	TStart	TStop	TSlice	MFEperfect	MFEsite	MFEratio	AllenScore	Paired	Unpaired	Structure	Sequence	DegradomeCategory	DegradomePval	Tissue
CL1Contig15831:179	Pyoung27596	#N/A	#N/A	miRNAn131	CL1Contig15831	HbMVK2/3	168	189	179	-30.2	-22.2	0.735099	8	3-9,187-181;10-19,179-170	1-2,189-188[UP5];x-x,180-180[BULt];20-21,169-168[UP3]	..((((((((((.(((((((..&..)))))))-))))))))))..	AUUUCGGUUCAGUUUUCUGAUU&UUUUAGAAA-CUGAACCGAAUC	4	0.00888991	bark
CL1Contig1977:1033	Pyoung114954	#N/A	#N/A	miRNAn132	CL1Contig1977	HbMVD2	1022	1042	1033	-33.3	-24.3	0.72973	7	1-8,1042-1035;10-18,1033-1025	9-9,1034-1034[SIL];19-21,1024-1022[UP3]	...(((((((((.((((((((&)))))))).)))))))))...	GGCAACUGAACCCAGCCGAGA&UUUCGGUUCGGUUCAGUUUUG	4	0.0177008	bark
CL1Contig2848:250	Pyoung162129	#N/A	#N/A	miRNAn133	CL1Contig2848	HbMVD1	239	259	250	-33.3	-24.3	0.72973	7	1-8,259-252;10-18,250-242	9-9,251-251[SIL];19-21,241-239[UP3]	...(((((((((.((((((((&)))))))).)))))))))...	GGCAACUGAACCCAGCCGAGA&UUUCGGUUCGGUUCAGUUUUG	4	0.0264333	bark
CL1Contig515:850	Pyoung96770	#N/A	#N/A	miRNAn63	CL1Contig515	HbREF3	838	860	850	-33.6	-22	0.654762	10	4-7,857-854;8-10,852-850;11-21,848-838	1-3,860-858[UP5];x-x,853-853[BULt];x-x,849-849[BULt]	(((((((((((.(((.((((...&...))))-)))-)))))))))))	GGCCAAUAUCUACUUAUGUAUAA&AUUUACA-AGG-AGAUAUUGGCC	4	0.00888991	bark
CL1Contig9860:987	Pyoung11787	#N/A	#N/A	miRNAn26	CL1Contig9860	HbSRPP2	974	996	987	-31.1	-20.8	0.66881	12	4-12,993-985;13-19,983-977	1-3,996-994[UP5];x-x,984-984[BULt];20-22,976-974[UP3]	...(((((((.(((((((((...&...)))))))))-)))))))...	GCUCAAUCCAUGCCACUUGUUUC&UAUAUAAGUGGU-UGGAUUGUAA	4	0.0350882	bark
CL27136Contig1:384	Pyoung147373	#N/A	#N/A	miRNAn136	CL27136Contig1	HbACAT3	372	393	384	-33.4	-23.8	0.712575	11	6-21,388-373	1-5,393-389[UP5];22-22,372-372[UP3]	.((((((((((((((((.....&.....)))))))))))))))).	AAACAUCCUUUCUCUUUCUCCC&GAAAAGAAGAGAAAGGAUGUUG	2	0.000871332	bark
CL280Contig4:15	Pmature80733	#N/A	#N/A	miRNAn88	CL280Contig4	HbHMGS2	1	25	15	-33.8	-22.7	0.671598	8	1-7,25-19;8-14,17-11;16-21,7-2	x-x,18-18[BULt];15-15,10-8[AILt];22-22,1-1[UP3]	.((((((...(((((((.(((((((&)))))))-)))))))--.)))))).	GAUGACUCGGAAGAGAGCAGAGGAG&CUCUUUU-CUCUCUU--AAGUCAUG	4	0.0689453	bark
CL5369Contig1:561	Pyoung37287	#N/A	#N/A	miRNAn138	CL5369Contig1	HbHMGR1	550	570	561	-32.8	-21.9	0.667683	9.5	1-16,570-555	17-21,554-550[UP3]	.....((((((((((((((((&)))))))))))))))).....	UUCCCAGUGUCCAUGUCAGGA&UUUUGAUGUGGACGCUAUUAC	4	0.00888991	bark
CL1Contig16058:742	Pmature48251	#N/A	#N/A	miRNAn139	CL1Contig16058	HbMVK1	728	751	742	-30.8	-20.7	0.672078	15	5-11,747-741;12-19,737-730	1-4,751-748[UP5];x-x,740-738[BULt];20-21,729-728[UP3]	..((((((((...(((((((....&....)))))))---))))))))..	GUUCGGUUCAUUUGUUCAGUGGAC&AAUAACUGAAC---UGAACCGAUU	4	0.00682884	leaf
CL202Contig10:159	Pyoung147987	#N/A	#N/A	miRNAn140	CL202Contig10	HbREF8	147	168	159	-32	-22.1	0.690625	11	5-19,164-150;20-20,148-148	1-4,168-165[UP5];x-x,149-149[BULt];21-21,147-147[UP3]	.(.(((((((((((((((....&....)))))))))))))))-).	GGAGGAUGAUGAAGAGGACGAU&CAAAUUCUCUUUAUCAUCC-CG	4	0.0468336	leaf
CL5369Contig1:561	Pyoung37287	#N/A	#N/A	miRNAn138	CL5369Contig1	HbHMGR1	550	570	561	-32.8	-21.9	0.667683	9.5	1-16,570-555	17-21,554-550[UP3]	.....((((((((((((((((&)))))))))))))))).....	UUCCCAGUGUCCAUGUCAGGA&UUUUGAUGUGGACGCUAUUAC	3	0.000901047	leaf
CL750Contig8:444	Pyoung47977	#N/A	#N/A	miRNAn142	CL750Contig8	HbGPS3	433	456	444	-34.3	-23.5	0.685131	14	3-6,454-451;7-8,447-446;10-20,444-434	1-2,456-455[UP5];x-x,450-448[BULt];9-9,445-445[SIL];21-21,433-433[UP3]	.(((((((((((.((...((((..&..))))---)).))))))))))).	AGUAGGAGGAGAGAGGUUUCGUCC&AAAUGA---UUGUCUCCUCCUACA	2	0.00189191	leaf
CL202Contig12:771	Pyoung38766	#N/A	#N/A	miRNAn143	CL202Contig12	HbREF8	760	780	771	-34.9	-25.4	0.727794	8	4-12,777-769;14-20,767-761	1-3,780-778[UP5];13-13,768-768[SIL];21-21,760-760[UP3]	.(((((((.(((((((((...&...))))))))).))))))).	GUCUACCCGAGCUUAUUCAGU&AUAGAAUGAGCUAGGGUAGAA	4	0.00582809	embryo
CL5369Contig2:679	Pyoung104178	#N/A	#N/A	miRNAn68	CL5369Contig2	HbHMGR1	662	688	679	-36.9	-24	0.650407	12.5	3-4,686-685;6-16,683-673;17-22,667-662	1-2,688-687[UP5];5-5,684-684[SIL];x-x,672-668[BULt]	((((((.....(((((((((((.((..&..)).)))))))))))-----))))))	CGGGAGACGCUGCAGAGGAUGUCGGGG&CACCAACAUCUUCUGU-----UUUCCG	4	0.00437426	embryo
CL1Contig11005:898	Pyoung96770	#N/A	#N/A	miRNAn63	CL1Contig11005	HbREF3	886	908	898	-33.6	-22	0.654762	10	4-7,905-902;8-10,900-898;11-21,896-886	1-3,908-906[UP5];x-x,901-901[BULt];x-x,897-897[BULt]	(((((((((((.(((.((((...&...))))-)))-)))))))))))	GGCCAAUAUCUACUUAUGUAUAA&AUUUACA-AGG-AGAUAUUGGCC	4	0.00905558	latex
CL1Contig1232:420	Pyoung96770	#N/A	#N/A	miRNAn63	CL1Contig1232	HbREF3	408	430	420	-33.6	-22	0.654762	10	4-7,427-424;8-10,422-420;11-21,418-408	1-3,430-428[UP5];x-x,423-423[BULt];x-x,419-419[BULt]	(((((((((((.(((.((((...&...))))-)))-)))))))))))	GGCCAAUAUCUACUUAUGUAUAA&AUUUACA-AGG-AGAUAUUGGCC	4	0.0135526	latex
CL1Contig17544:39	Pyoung86176	#N/A	#N/A	miRNAn18	CL1Contig17544	HbREF7	29	52	39	-30.6	-21.3	0.696078	11.5	1-7,52-46;8-17,41-32;19-21,31-29	x-x,45-42[BULt];18-18,x-x[BULq]	(((-((((((((((....(((((((&)))))))----)))))))))).)))	GGC-UGAAGGGAAAGAAAGCGAGAA&UUCUCGU----UUUCCUUUUAUGCU	4	0.0488016	latex
CL5369Contig2:679	Pyoung104178	#N/A	#N/A	miRNAn68	CL5369Contig2	HbHMGR1	662	688	679	-36.9	-24	0.650407	12.5	3-4,686-685;6-16,683-673;17-22,667-662	1-2,688-687[UP5];5-5,684-684[SIL];x-x,672-668[BULt]	((((((.....(((((((((((.((..&..)).)))))))))))-----))))))	CGGGAGACGCUGCAGAGGAUGUCGGGG&CACCAACAUCUUCUGU-----UUUCCG	2	0.00314451	latex
CL750Contig8:444	Pyoung47977	#N/A	#N/A	miRNAn142	CL750Contig8	HbGSP3	433	456	444	-34.3	-23.5	0.685131	14	3-6,454-451;7-8,447-446;10-20,444-434	1-2,456-455[UP5];x-x,450-448[BULt];9-9,445-445[SIL];21-21,433-433[UP3]	.(((((((((((.((...((((..&..))))---)).))))))))))).	AGUAGGAGGAGAGAGGUUUCGUCC&AAAUGA---UUGUCUCCUCCUACA	4	0.00453809	latex
CL471Contig2:723	Pyoung60479	#N/A	#N/A	miRNAn50	CL471Contig2	HbPMD2	712	732	723	-24.9	-16.3	0.654618	11.5	5-13,728-720;15-19,718-714	1-4,732-729[UP5];14-14,719-719[SIL];20-21,713-712[UP3]	..(((((.(((((((((....&....))))))))).)))))..	GCCUUGUUUUUGCCCUUGCAA&AUAAAAGGGUAAAUAUAAGUU	4	0.0181353	root
CL5369Contig1:561	Pyoung37287	#N/A	#N/A	miRNAn138	CL5369Contig1	HbHMGR1	550	570	561	-32.8	-21.9	0.667683	9.5	1-16,570-555	17-21,554-550[UP3]	.....((((((((((((((((&)))))))))))))))).....	UUCCCAGUGUCCAUGUCAGGA&UUUUGAUGUGGACGCUAUUAC	4	0.00365366	root
CL5369Contig2:679	Pyoung104178	#N/A	#N/A	miRNAn68	CL5369Contig2	HbHMGR1	662	688	679	-36.9	-24	0.650407	12.5	3-4,686-685;6-16,683-673;17-22,667-662	1-2,688-687[UP5];5-5,684-684[SIL];x-x,672-668[BULt]	((((((.....(((((((((((.((..&..)).)))))))))))-----))))))	CGGGAGACGCUGCAGAGGAUGUCGGGG&CACCAACAUCUUCUGU-----UUUCCG	3	0.000600123	root
