# Supplementary material for: Post-transcriptional regulation of several biological processes involved in latex production in Hevea brasiliensis
Source: PeerJ. 2020 Apr 29;8:e8932. doi: 10.7717/peerj.8932 (PMC7195832; doi:10.7717/peerj.8932)
Supplement: Table S10 [file peerj-08-8932-s010.xlsx]

## Sheet: 10.
CleaveLand output for AP2/ERF gene families in Hevea and miRNA annotation
SiteID	Query	Annotation PNRD	Annotation MirBase	new annotation	Transcript	AP2/ERF annotation	TStart	TStop	TSlice	MFEperfect	MFEsite	MFEratio	AllenScore	Paired	Unpaired	Structure	Sequence	DegradomeCategory	DegradomePval	Tissue
hevea_454_c19752:343	Pyoung149696	zma-miR156g-3p	zma-miR156g-3p		hevea_454_c19752	HbERF-IXb02	334	352	343	-33.9	-24.5	0.722714	4	1-3,352-350;5-16,348-337;18-20,336-334	4-4,349-349[SIL];17-17,x-x[BULq]	(((-((((((((((((.(((&))).)))))))))))).)))	CUC-CUUCUCUUUCUGCCGG&CUGACAGAAAGAGAAGUGAG	4	0.016107	bark
hevea_454_rep_c22270:390	Pyoung81134	#N/A	#N/A	miRNAn20	hevea_454_rep_c22270	HbERF-IIIc01	379	404	390	-39	-25.6	0.65641	16	1-6,404-399;7-9,396-394;10-19,390-381;21-21,379-379	x-x,398-397[BULt];x-x,393-391[BULt];20-20,380-380[SIL]	(.((((((((((...(((..((((((&))))))--)))---)))))))))).)	AGGGCCCACGACGUGGCGGCGCUGGC&GUCAGU--UGU---GUCGUGGGUUGU	4	0.0475469	bark
hevea_454_rep_c26270:341	Pmature78394	#N/A	#N/A	miRNAn97	hevea_454_rep_c26270	HbERF-Xa05	331	350	341	-31.9	-22.9	0.717868	8	3-8,348-343;10-18,341-333	1-2,350-349[UP5];9-9,342-342[SIL];19-20,332-331[UP3]	..(((((((((.((((((..&..)))))).)))))))))..	AUUAUAGAGGAGUGAGACAA&UAGUCUCAGUUCUCUAUAGA	4	0.016107	bark
hevea_454_rep_c32212:265	health2164	#N/A	#N/A	miRNAn4	hevea_454_rep_c32212	HbERF-VIIa10	254	275	265	-42.4	-27.7	0.653302	9	3-4,273-272;5-8,270-267;10-21,265-254	1-2,275-274[UP5];x-x,271-271[BULt];9-9,266-266[SIL]	((((((((((((.((((.((..&..))-)))).))))))))))))	CCAUUUUCCCCAUGGACGCUGC&UGAG-GUCUUUGGGGAGAGUGG	4	0.121821	bark
hevea_454_rep_c54314:55	Pyoung128299	#N/A	#N/A	miRNAn156	hevea_454_rep_c54314	HbERF-Vb03	44	64	55	-29.4	-19.4	0.659864	9	3-5,62-60;8-21,57-44	1-2,64-63[UP5];6-7,59-58[SIL]	((((((((((((((..(((..&..)))..))))))))))))))	GUUUGAGAGGAAGAAGGAAGC&CGUUCAGUUUUCCUUUCAAAU	4	0.092833	bark
hevea_454_rep_c74324:497	Pmature7131	#N/A	#N/A	miRNAn157	hevea_454_rep_c74324	HbAP2-02	482	506	497	-28.3	-19	0.671378	10.5	3-16,504-491;17-19,486-484;21-21,482-482	1-2,506-505[UP5];x-x,490-487[BULt];20-20,483-483[SIL]	(.(((....((((((((((((((..&..))))))))))))))----))).)	UGGGUUGUAUCGGUUUGAUCAGUAG&AAAUUGAUUAAACCGA----ACUGA	4	0.0319546	bark
hevea_454_rep_c8782:1219	Pyoung141283	#N/A	#N/A	miRNAn158	hevea_454_rep_c8782	HbRAV-03	1209	1228	1219	-36.3	-24.1	0.663912	7.5	1-11,1228-1218;13-13,1217-1217;16-20,1214-1210	12-12,x-x[BULq];14-15,1216-1215[SIL];21-21,1209-1209[UP3]	.(((((..(-(((((((((((&))))))))))).)..))))).	GGCGGAAGG-AGCUGGUGGGU&ACCCAUCAGCUACAGUUUGUA	4	0.0319546	bark
hevea_454_rep_c945:665	Pmature111945	bna-miR167b	bna-miR167b		hevea_454_rep_c945	HbERF-VIIa07	649	675	665	-39.2	-28.1	0.716837	12.5	1-5,675-671;6-11,669-664;12-22,659-649	x-x,670-670[BULt];x-x,663-660[BULt]	(((((((((((....((((((.(((((&)))))-))))))----)))))))))))	GAAGCUGCCAGAGCAUAUGAUGCUGAG&UUUAG-AUCAUG----CUGGCAGCUUC	2	0.00297132	bark
hevea_454_c54212:35	Pmature358	#N/A	#N/A	miRNAn159	hevea_454_c54212	HbERF-IIa03	23	44	35	-33.8	-23.4	0.692308	6	1-14,44-31;16-17,28-27;19-21,26-24	15-15,30-29[AILt];18-18,x-x[BULq];22-22,23-23[UP3]	.(((-((..((((((((((((((&))))))))))))))-.)).))).	GGUG-CUCGAGGAGAGAGAAGAG&CUCUUUUCUCUCUU-AAGUCAUG	4	0.0637118	leaf
hevea_454_rep_c1402:408	Pyoung39917	#N/A	#N/A	miRNAn160	hevea_454_rep_c1402	HbERF-VIIIa10	397	419	408	-31.5	-20.88	0.662857	13.5	2-9,418-411;12-17,406-401;19-21,399-397	1-1,419-419[UP5];10-11,410-407[AILt];18-18,400-400[SIL]	(((.((((((....((((((((.&.))))))))--..)))))).)))	ACCGGACAGGGAAUAGCUGAGUC&UAUUUAGUU--UACCUGUUGGGU	4	0.0323801	leaf
hevea_454_rep_c18953:732	Pmature80311	#N/A	#N/A	miRNAn60	hevea_454_rep_c18953	HbERF-VIIa3	721	741	732	-27.1	-18.6	0.686347	11	3-16,739-726	1-2,741-740[UP5];17-21,725-721[UP3]	.....((((((((((((((..&..)))))))))))))).....	AGUGAGGGGUUGAUACAGAGA&AAUUUGUAUCAGCUCUAUUUU	4	0.010912	leaf
hevea_454_rep_c37861:61	Pyoung106806	#N/A	#N/A	miRNAn162	hevea_454_rep_c37861	HbERF-VIIIa6	51	70	61	-31.2	-21.9	0.701923	15	9-20,62-51	1-8,70-63[UP5]	((((((((((((........&........))))))))))))	UUCUCCUUCCUCAAACCCAA&AUCAUUUAGAGGAAGGAGAA	1	0.00161031	leaf
hevea_454_rep_c40731:672	Pmature20730	hbr-miR9386	hbr-miR9386		hevea_454_rep_c40731	HbERF-VIIa2	660	682	672	-38.3	-25.3	0.660574	9.5	2-7,681-676;8-18,674-664	1-1,682-682[UP5];x-x,675-675[BULt];19-22,663-660[UP3]	....(((((((((((.((((((.&.))))))-)))))))))))....	GUCUGGUUCGGAGGUAGGAAGCC&AGCUUCC-ACUUUCGAACUGCAA	3	0.00261038	leaf
hevea_454_rep_c4279:1083	Pyoung21585	#N/A	#N/A	miRNAn163	hevea_454_rep_c4279	HbERF-VIIIa12	1072	1092	1083	-35.4	-24.4	0.689266	8.5	2-5,1091-1088;8-19,1085-1074	1-1,1092-1092[UP5];6-7,1087-1086[SIL];20-21,1073-1072[UP3]	..((((((((((((..((((.&.))))..))))))))))))..	UAAGAGGGGAGCUGAUCGCUU&UAGCGUCCAGCUUUCCUUUAA	1	0.000322269	leaf
hevea_454_rep_c46995:428	Pmature26362	#N/A	#N/A	miRNAn164	hevea_454_rep_c46995	HbERF-VIIa8	416	438	428	-36.1	-26.9	0.745152	6.5	3-5,436-434;6-16,432-422;17-21,420-416	1-2,438-437[UP5];x-x,433-433[BULt];x-x,421-421[BULt]	(((((.(((((((((((.(((..&..)))-)))))))))))-)))))	CAGAACCACGUGAGAGACUGCGA&CAGCA-UCUCUCACGUG-UUUUG	1	0.000644434	leaf
hevea_454_rep_c5080:822	Pyoung32515	#N/A	#N/A	miRNAn165	hevea_454_rep_c5080	HbERF-Ib6	807	831	822	-35.5	-24.5	0.690141	10	1-4,831-828;6-18,826-814;19-21,809-807	5-5,827-827[SIL];x-x,813-810[BULt]	(((....(((((((((((((.((((&)))).)))))))))))))----)))	CGAAAGUACCGAGCCAGAGUCGGGU&GCUCUAUUUUGGUUCGGU----UCG	4	0.021705	leaf
hevea_454_rep_c8113:1557	Pyoung108429	#N/A	#N/A	miRNAn166	hevea_454_rep_c8113	HbERF-VIIa13	1545	1568	1557	-29.5	-23.5	0.79661	8.5	1-7,1568-1562;8-20,1559-1547	x-x,1561-1560[BULt];21-22,1546-1545[UP3]	..(((((((((((((..(((((((&)))))))--)))))))))))))..	CGAUUUGAAGGAGAGAUUUGGGUG&CAUCCAA--CUUUCCUUUAAAUAA	4	0.010912	leaf
hevea_454_rep_c8782:1219	Pyoung141283	#N/A	#N/A	miRNAn158	hevea_454_rep_c8782	HbRAV-03	1209	1228	1219	-36.3	-24.1	0.663912	7.5	1-11,1228-1218;13-13,1217-1217;16-20,1214-1210	12-12,x-x[BULq];14-15,1216-1215[SIL];21-21,1209-1209[UP3]	.(((((..(-(((((((((((&))))))))))).)..))))).	GGCGGAAGG-AGCUGGUGGGU&ACCCAUCAGCUACAGUUUGUA	4	0.021705	leaf
hevea_454_c22933:91	Pyoung122146	ghr-miR396g	ata-miR396c-5p		hevea_454_c22933	HbERF-VI05	79	99	91	-35.3	-23.2	0.657224	7	1-8,99-92;10-11,91-90;12-20,88-80	9-9,x-x[BULq];x-x,89-89[BULt];21-21,79-79[UP3]	.(((((((((.((-((((((((&)))))))).))-))))))))).	GCUGCAGCUUCUC-UGGACUUC&GAAGUUCAAGA-AAGCUGUGGA	2	0.00406933	flower
hevea_454_c24965:634	Pmature37825	#N/A	#N/A	miRNAn168	hevea_454_c24965	HbAP2-03	621	644	634	-33.1	-23.1	0.697885	6.5	1-6,644-639;7-14,637-630;15-21,627-621	x-x,638-638[BULt];x-x,629-628[BULt]	(((((((..((((((((.((((((&))))))-))))))))--)))))))	GCUGUUCAUGGUUCAGUGUUGGUU&AACCGA-ACUGAACU--GAAUAGU	3	0.000290042	flower
hevea_454_c58761:208	Pyoung168347	#N/A	#N/A	miRNAn169	hevea_454_c58761	HbERF-Xa01	197	217	208	-32.1	-21.1	0.657321	11	5-18,213-200	1-4,217-214[UP5];19-21,199-197[UP3]	...((((((((((((((....&....))))))))))))))...	CGAGGCGUGUUACAUACAAUU&UUGAGUAUGUAACAUGUCACU	4	0.00827586	flower
hevea_454_rep_c16874:222	TPD5422	#N/A	#N/A	miRNAn170	hevea_454_rep_c16874	HbERF-VIIa01	213	234	222	-37.3	-24.82	0.665416	12	1-7,234-228;10-16,222-216;18-19,215-214	8-9,227-223[AILt];17-17,x-x[BULq];20-20,213-213[UP3]	.((-(((((((.....(((((((&)))))))---..))))))).)).	CUG-CUCCUCCCUUUUCACUUCC&GGAAGUG---UAGGAGGAGACAA	4	0.0565124	flower
hevea_454_rep_c18341:978	Pyoung112992	#N/A	#N/A	miRNAn171	hevea_454_rep_c18341	HbERF-IXc06	967	987	978	-31.1	-22	0.707395	9	1-9,987-979;11-18,977-970	10-10,978-978[SIL];19-21,969-967[UP3]	...((((((((.(((((((((&))))))))).))))))))...	CGCCAUGGUGGGGUUCAGCUU&AAGUUGGACGCUAUUAUGAAU	4	0.00827586	flower
hevea_454_rep_c21830:617	Pmature78394	#N/A	#N/A	miRNAn97	hevea_454_rep_c21830	HbERF-Xb01	607	627	617	-31.9	-21.6	0.677116	9.5	3-6,625-622;7-17,620-610	1-2,627-626[UP5];x-x,621-621[BULt];18-20,609-607[UP3]	...(((((((((((.((((..&..))))-)))))))))))...	GUGGUAGAGAACUGAAGGCGA&UAGUCU-CAGUUCUCUAUAGA	4	0.0565124	flower
hevea_454_rep_c22480:532	Pyoung86176	#N/A	#N/A	miRNAn18	hevea_454_rep_c22480	HbERF-IVa03	521	541	532	-30.6	-23.5	0.767974	7	1-5,541-537;7-20,535-522	6-6,536-536[SIL];21-21,521-521[UP3]	.((((((((((((((.(((((&))))).)))))))))))))).	UGUAUGAAGGGGAAAGGAGGG&UUCUCGUUUUCCUUUUAUGCU	4	0.0164832	flower
hevea_454_rep_c32212:223	Pyoung4	#N/A	#N/A	miRNAn174	hevea_454_rep_c32212	HbERF-VIIa10	210	232	223	-41.7	-27.9	0.669065	9.5	3-8,230-225;11-13,222-220;14-22,218-210	1-2,232-231[UP5];9-10,224-223[SIL];x-x,219-219[BULt]	(((((((((.(((..((((((..&..))))))..)))-)))))))))	AGCCAGACACGCACCCCCUUCCU&UUGAGGGGAAUGU-UGUCUGGCU	4	0.0164832	flower
hevea_454_rep_c4279:1005	Pmature103547	#N/A	#N/A	miRNAn175	hevea_454_rep_c4279	HbERF-VIIIa12	993	1014	1005	-40.7	-26.6	0.653563	11	3-7,1012-1008;9-19,1006-996	1-2,1014-1013[UP5];8-8,1007-1007[SIL];20-22,995-993[UP3]	...(((((((((((.(((((..&..))))).)))))))))))...	GCCGUCUUGUCCCUCGGCGCCA&CAGUGCUUAGGGAUAGGACUUG	4	0.00827586	flower
hevea_454_rep_c6308:99	Pyoung159561	#N/A	#N/A	miRNAn176	hevea_454_rep_c6308	HbERF-VI-L03	87	108	99	-34.2	-22.6	0.660819	10	4-8,105-101;10-11,99-98;14-22,95-87	1-3,108-106[UP5];9-9,100-100[SIL];12-13,97-96[SIL]	(((((((((..((.(((((...&...))))).))..)))))))))	UCAGUAGCGGAUUUAUGUCGGC&UUGGACAUUAAAACGCUACUGA	2	0.00203674	flower
hevea_454_rep_c6678:890	Pyoung165541	#N/A	#N/A	miRNAn177	hevea_454_rep_c6678	HbERF-IVa02	879	899	890	-39	-26.7	0.684615	8.5	4-12,896-888;14-21,887-880	1-3,899-897[UP5];13-13,x-x[BULq];22-22,879-879[UP3]	.((((((((-(((((((((...&...))))))))).)))))))).	UGAGCUGCC-GCUUGAUUUGUC&UUAAGAUCAAGCUGGCAGCUUC	2	0.00203674	flower
hevea_454_c24965:634	Pmature37825	#N/A	#N/A	miRNAn168	hevea_454_c24965	HbAP2-03	621	644	634	-33.1	-23.1	0.697885	6.5	1-6,644-639;7-14,637-630;15-21,627-621	x-x,638-638[BULt];x-x,629-628[BULt]	(((((((..((((((((.((((((&))))))-))))))))--)))))))	GCUGUUCAUGGUUCAGUGUUGGUU&AACCGA-ACUGAACU--GAAUAGU	2	0.0020387	latex
hevea_454_rep_c10035:654	Pyoung115469	#N/A	#N/A	miRNAn179	hevea_454_rep_c10035	HbERF-IVa1	642	663	654	-27.4	-19.7	0.718978	7.5	1-5,663-659;8-11,656-653;12-21,651-642	6-7,658-657[SIL];x-x,652-652[BULt]	((((((((((.((((..(((((&)))))..))))-))))))))))	AUCUGUCAAUAUCCUCUGCAAA&UUUGUUAAGGA-AUUGAUAGAU	2	0.0020387	latex
hevea_454_rep_c10220:590	Pyoung145091	#N/A	#N/A	miRNAn98	hevea_454_rep_c10220	HbERF-VIIIa08	579	599	590	-40.4	-27.3	0.675743	10	4-13,596-587;15-18,586-583;19-19,581-581	1-3,599-597[UP5];14-14,x-x[BULq];x-x,582-582[BULt];20-21,580-579[UP3]	..(.((((-((((((((((...&...)))))))))).))))-)..	CAGAGGCG-GUGGGGGAGAAGC&UUAUCUUCCCCACUCGCC-CAU	4	0.0149373	latex
hevea_454_rep_c10220:619	Pyoung44924	#N/A	#N/A	miRNAn181	hevea_454_rep_c10220	HbERF-VIIIa08	608	628	619	-31.8	-20.8	0.654088	10.5	2-5,627-624;8-17,621-612	1-1,628-628[UP5];6-7,623-622[SIL];18-21,611-608[UP3]	....((((((((((..((((.&.))))..))))))))))....	GAGGUGAAGGAGAGGAGGACU&CGUCCAGCUUUCCUUUAAAAA	4	0.0149373	latex
hevea_454_rep_c14033:969	Pyoung32515	#N/A	#N/A	miRNAn165	hevea_454_rep_c14033	HbERF-IXa02	958	977	969	-35.5	-23.2	0.653521	6.5	1-5,977-973;7-12,972-967;14-21,965-958	6-6,x-x[BULq];13-13,966-966[SIL]	((((((((.((((((-(((((&))))).)))))).))))))))	CGAACUGAUUCAAGA-AGGGC&GCUCUAUUUUGGUUCGGUUCG	4	0.0441457	latex
hevea_454_rep_c14983:331	Pyoung139852	#N/A	#N/A	miRNAn183	hevea_454_rep_c14983	HbSoloist1	320	340	331	-31.6	-20.8	0.658228	9.5	2-6,339-335;8-16,333-325	1-1,340-340[UP5];7-7,334-334[SIL];17-21,324-320[UP3]	.....(((((((((.(((((.&.))))).))))))))).....	UGAUAACAGACAGUGACAGCA&AGUUGUGACUGUUUGUAUACA	4	0.0149373	latex
hevea_454_rep_c2227:49	Pmature84420	#N/A	#N/A	miRNAn184	hevea_454_rep_c2227	HbERF-VIIIa04	40	58	49	-39.8	-26.1	0.655779	5.5	2-4,57-55;6-15,53-44;17-19,43-41	1-1,58-58[UP5];5-5,54-54[SIL];16-16,x-x[BULq];20-20,40-40[UP3]	.(((-((((((((((.(((.&.))).)))))))))).))).	GGGC-GAGAGAGAGGAGAGA&GCUCACCUCUCUCUCUGUCA	4	0.0369258	latex
hevea_454_rep_c32212:265	health2164	#N/A	#N/A	miRNAn4	hevea_454_rep_c32212	HbERF-VIIa10	254	275	265	-42.4	-27.7	0.653302	9	3-4,273-272;5-8,270-267;10-21,265-254	1-2,275-274[UP5];x-x,271-271[BULt];9-9,266-266[SIL]	((((((((((((.((((.((..&..))-)))).))))))))))))	CCAUUUUCCCCAUGGACGCUGC&UGAG-GUCUUUGGGGAGAGUGG	4	0.0584236	latex
hevea_454_rep_c33173:736	TPD1675	#N/A	#N/A	miRNAn35	hevea_454_rep_c33173	HbERF-VIIa14	725	746	736	-42.4	-27.7	0.653302	9	3-4,744-743;5-8,741-738;10-21,736-725	1-2,746-745[UP5];x-x,742-742[BULt];9-9,737-737[SIL]	((((((((((((.((((.((..&..))-)))).))))))))))))	CCAUUUUCCCCAUGGACGCUGC&UGAG-GUCUUUGGGGAGAGUGG	2	0.01217	latex
hevea_454_rep_c45776:701	Pyoung104178	#N/A	#N/A	miRNAn68	hevea_454_rep_c45776	HbERF-IIIe04	688	710	701	-36.9	-25.1	0.680217	6	1-10,710-701;12-13,699-698;14-14,696-696;16-21,694-689	11-11,700-700[SIL];x-x,697-697[BULt];15-15,695-695[SIL];22-22,688-688[UP3]	.((((((.(.((.((((((((((&)))))))))).))-).)))))).	GGGAAAAGAUGGUGAUGUUGGUG&CACCAACAUCUUC-UGUUUUCCG	3	0.00110322	latex
hevea_454_rep_c46995:605	Pyoung147598	#N/A	#N/A	miRNAn76	hevea_454_rep_c46995	HbERF-VIIa8	594	614	605	-26.8	-18.8	0.701493	13	4-14,611-601	1-3,614-612[UP5];15-21,600-594[UP3]	.......(((((((((((...&...))))))))))).......	GGUGGGAGGGAUGAAGUCGGA&UAAGACUUUAUCCCAAAAAUU	0	0.00304167	latex
hevea_454_rep_c5080:1264	Pyoung86176	#N/A	#N/A	miRNAn18	hevea_454_rep_c5080	HbERF-Ib6	1252	1273	1264	-30.6	-20.2	0.660131	7	1-5,1273-1269;7-14,1267-1260;15-18,1258-1255;20-21,1253-1252	6-6,1268-1268[SIL];x-x,1259-1259[BULt];19-19,1254-1254[SIL]	((.((((.((((((((.(((((&))))).))))))))-)))).))	AGGAUGGUAAGGAGAAGGAGGA&UUCUCGUUUUCCUU-UUAUGCU	4	0.0369258	latex
hevea_454_rep_c54314:54	Pmature85894	#N/A	#N/A	miRNAn190	hevea_454_rep_c54314	HbERF-Vb03	43	63	54	-27.9	-19.7	0.706093	7.5	2-4,62-60;7-21,57-43	1-1,63-63[UP5];5-6,59-58[SIL]	(((((((((((((((..(((.&.)))..)))))))))))))))	GGUUUGAGAGGAAGAAGGAAG&GUUCAGUUUUCCUUUCAAAUU	4	0.022322	latex
hevea_454_rep_c6308:99	Pyoung159561	#N/A	#N/A	miRNAn176	hevea_454_rep_c6308	HbERF-VI-L03	87	108	99	-34.2	-22.6	0.660819	10	4-8,105-101;10-11,99-98;14-22,95-87	1-3,108-106[UP5];9-9,100-100[SIL];12-13,97-96[SIL]	(((((((((..((.(((((...&...))))).))..)))))))))	UCAGUAGCGGAUUUAUGUCGGC&UUGGACAUUAAAACGCUACUGA	2	0.0020387	latex
hevea_454_rep_c64305:944	TPD1675	#N/A	#N/A	miRNAn35	hevea_454_rep_c64305	HbERF-VIIa9	933	954	944	-42.4	-27.7	0.653302	9	3-4,952-951;5-8,949-946;10-21,944-933	1-2,954-953[UP5];x-x,950-950[BULt];9-9,945-945[SIL]	((((((((((((.((((.((..&..))-)))).))))))))))))	CCAUUUUCCCCAUGGACGCUGC&UGAG-GUCUUUGGGGAGAGUGG	1	0.00252628	latex
hevea_454_rep_c8142:225	Pmature9487	#N/A	#N/A	miRNAn193	hevea_454_rep_c8142	HbSoloist2	214	234	225	-28.5	-21.5	0.754386	10.5	1-5,234-230;7-16,228-219	6-6,229-229[SIL];17-21,218-214[UP3]	.....((((((((((.(((((&))))).)))))))))).....	GUGAUUGCAGACAGUGGCAGC&GUUGUGACUGUUUGUAUAAAA	4	0.00749673	latex
hevea_454_rep_c8782:1219	Pyoung141283	#N/A	#N/A	miRNAn168	hevea_454_rep_c8782	HbRAV-03	1209	1228	1219	-36.3	-24.1	0.663912	7.5	1-11,1228-1218;13-13,1217-1217;16-20,1214-1210	12-12,x-x[BULq];14-15,1216-1215[SIL];21-21,1209-1209[UP3]	.(((((..(-(((((((((((&))))))))))).)..))))).	GGCGGAAGG-AGCUGGUGGGU&ACCCAUCAGCUACAGUUUGUA	0	0.00152199	latex
hevea_454_rep_c87922:335	Pmature78394	#N/A	#N/A	miRNAn97	hevea_454_rep_c87922	HbERF-Ib8	325	344	335	-31.9	-22.2	0.695925	8	3-8,342-337;10-15,335-330;17-20,328-325	1-2,344-343[UP5];9-9,336-336[SIL];16-16,329-329[SIL]	((((.((((((.((((((..&..)))))).)))))).))))	UCUACAGAGGAGUGAGGCAG&UAGUCUCAGUUCUCUAUAGA	4	0.0149373	latex
hevea_454_rep_c91560:665	Pyoung147598	#N/A	#N/A	miRNAn76	hevea_454_rep_c91560	HbERF-VIIa5	654	674	665	-26.8	-18.8	0.701493	13	4-14,671-661	1-3,674-672[UP5];15-21,660-654[UP3]	.......(((((((((((...&...))))))))))).......	GGUGGGAGGGAUGAAGUCGGA&UAAGACUUUAUCCCAAAAAUU	3	0.00330601	latex
hevea_454_rep_c30115:649	Pyoung104982	#N/A	#N/A	miRNAn197	hevea_454_rep_c30115	HbERF-Xa03	638	658	649	-47.7	-36.8	0.771488	5.5	2-18,657-641	1-1,658-658[UP5];19-21,640-638[UP3]	...(((((((((((((((((.&.)))))))))))))))))...	CUUGGGUGGGUUGAGGCUGGU&CCCAGCCUCGACCCACCUCGU	4	0.00646471	root
hevea_454_rep_c37727:261	Pmature65899	#N/A	#N/A	miRNAn198	hevea_454_rep_c37727	HbERF-Vb02	250	270	261	-31.9	-22.2	0.695925	12.5	6-21,265-250	1-5,270-266[UP5]	((((((((((((((((.....&.....))))))))))))))))	CUGCUUGCUUGCUUCGCGGUG&UGAUAUGAAGUAGGUAAGUAG	4	0.00646471	root
hevea_454_rep_c46995:605	Pyoung147598	#N/A	#N/A	miRNAn76	hevea_454_rep_c46995	HbERF-VIIa8	594	614	605	-26.8	-18.8	0.701493	13	4-14,611-601	1-3,614-612[UP5];15-21,600-594[UP3]	.......(((((((((((...&...))))))))))).......	GGUGGGAGGGAUGAAGUCGGA&UAAGACUUUAUCCCAAAAAUU	0	0.00265285	root
hevea_454_rep_c7722:831	Pmature40214	#N/A	#N/A	miRNAn200	hevea_454_rep_c7722	HbERF-IIIe02	819	840	831	-31.4	-22.6	0.719745	10	4-10,837-831;11-21,829-819	1-3,840-838[UP5];x-x,830-830[BULt]	(((((((((((.(((((((...&...)))))))-)))))))))))	UUGGUGGGGGACUGAGGGUCUU&CUUACCCUUA-UCCUUUACUAA	2	0.00266661	root
hevea_454_rep_c8903:56	Pyoung106806	#N/A	#N/A	miRNAn162	hevea_454_rep_c8903	HbERF-VIIIa05	46	65	56	-31.2	-21.9	0.701923	15	9-20,57-46	1-8,65-58[UP5]	((((((((((((........&........))))))))))))	UUCUCCUUCCUCAAACCCAA&AUCAUUUAGAGGAAGGAGAA	4	0.0443847	root
hevea_454_rep_c91560:665	Pyoung147598	#N/A	#N/A	miRNAn76	hevea_454_rep_c91560	HbERF-VIIa5	654	674	665	-26.8	-18.8	0.701493	13	4-14,671-661	1-3,674-672[UP5];15-21,660-654[UP3]	.......(((((((((((...&...))))))))))).......	GGUGGGAGGGAUGAAGUCGGA&UAAGACUUUAUCCCAAAAAUU	0	0.0019903	root
