# Supplementary material for: Post-transcriptional regulation of several biological processes involved in latex production in Hevea brasiliensis
Source: PeerJ. 2020 Apr 29;8:e8932. doi: 10.7717/peerj.8932 (PMC7195832; doi:10.7717/peerj.8932)
Supplement: Table S12 [file peerj-08-8932-s012.xlsx]

## Sheet: 12.
CleaveLand output for genes involved in ethylene signaling and miRNA annotation
SiteID	Query	Annotation PNRD	Annotation mirBase	New annotation	Transcript	TStart	TStop	TSlice	MFEperfect	MFEsite	MFEratio	AllenScore	Paired	Unpaired	Structure	Sequence	DegradomeCategory	DegradomePval	Tissue
mRNA00000001_ACO:357	Pmature172669	#N/A	#N/A	miRNA n232	mRNA00000001_ACO	344	366	357	-30.60	-22.80	0.745098039215686	10	4-14,363-353;15-20,350-345	1-3,366-364[UP5];x-x,352-351[BULt];21-21,344-344[UP3]	.((((((..(((((((((((...&...)))))))))))--)))))).	UGGCUGAAUACCGAGCUGAACUG&UAUUUCAGUUCGGU--UCAGUUU	4	0.0298996	bark
mRNA00000001_HEVBR_CTR1:2110	Pmature57873	#N/A	#N/A	miRNA n233	mRNA00000001_HEVBR_CTR1	2096	2120	2110	-33.70	-22.60	0.670623145400593	8	1-6,2120-2115;7-11,2113-2109;12-18,2107-2101;19-21,2098-2096	x-x,2114-2114[BULt];x-x,2108-2108[BULt];x-x,2100-2099[BULt]	(((..(((((((.(((((.((((((&))))))-)))))-)))))))--)))	GGUUAAGUAUGGCUUAUGAUGUGGC&GCUACA-CAUAA-UCAUACU--ACC	4	0.0298996	bark
mRNA00000001_HEVBR_CTR1:431	Pmature32664	#N/A	#N/A	miRNA n234	mRNA00000001_HEVBR_CTR1	429	440	431	-32.90	-21.50	0.653495440729483	2	11-21,439-429	10-10,440-440[SIL]	(((((((((((.&.)))))))))))	GAGCUGGGCGCA&AUUCAAAAUAGC	4	0.0147066	flower
mRNA00000001_HEVBR_CTR1:1854	Pmature14015	#N/A	#N/A	miRNA n235	mRNA00000001_HEVBR_CTR1	1841	1863	1854	-40.70	-29.20	0.717444717444717	7	2-14,1862-1850;17-20,1846-1843	1-1,1863-1863[UP5];15-16,1849-1847[AILt];21-22,1842-1841[UP3]	..((((...(((((((((((((.&.)))))))))))))-..))))..	ACCGUGCUGAUUGGCAUGGCUCG&UGAGCCGUGCCAAU-AUCACGUA	2	0.00980727	latex
mRNA00000001_HEVBR_CTR1:439	Pmature136494	#N/A	#N/A	miRNA n236	mRNA00000001_HEVBR_CTR1	428	448	439	-37.00	-24.20	0.654054054054054	18	10-21,439-428	1-9,448-440[UP5]	((((((((((((.........&.........))))))))))))	AGAGCUGGGCGCAACAGACGG&UUUUGAAUAGCGUCCGGCUCU	4	0.0307791	root
mRNA00000011_ACO:353	Pmature58523	#N/A	#N/A	miRNA n237	mRNA00000011_ACO	342	362	353	-23.80	-17.00	0.714285714285714	6	1-9,362-354;11-12,352-351;14-21,349-342	10-10,353-353[SIL];13-13,350-350[SIL]	((((((((.((.(((((((((&))))))))).)).))))))))	GGAGUUUGCAGCGAAGUUGGA&UCCAACUUUUCUUUAAAUUUU	4	0.140822	bark
mRNA00000002_ACS:787	Pmature96548	#N/A	#N/A	miRNA n238	mRNA00000002_ACS	776	796	787	-28.30	-19.60	0.692579505300353	8	1-13,796-784;15-16,782-781	14-14,783-783[SIL];17-21,780-776[UP3]	.....((.(((((((((((((&))))))))))))).)).....	AGGUGGAGUGCAAUCUUGAUC&GAUUAAGAUUGCGGUUAAUUA	2	0.018419	flower
mRNA00000009_ACS:18	Pmature151008	#N/A	#N/A	miRNA n239	mRNA00000009_ACS	7	27	18	-32.40	-21.60	0.666666666666667	10.5	6-16,22-12;18-21,10-7	1-5,27-23[UP5];17-17,11-11[SIL]	((((.(((((((((((.....&.....))))))))))).))))	AGUGGCCAGCUUUUGUCUAGG&UUAAAACAAAAGCUGGACGCU	2	0.0091825	leaf
mRNA00000009_ACS:18	Pmature151008	#N/A	#N/A	miRNA n239	mRNA00000009_ACS	7	27	18	-32.40	-21.60	0.666666666666667	10.5	6-16,22-12;18-21,10-7	1-5,27-23[UP5];17-17,11-11[SIL]	((((.(((((((((((.....&.....))))))))))).))))	AGUGGCCAGCUUUUGUCUAGG&UUAAAACAAAAGCUGGACGCU	4	0.00632367	embryo
mRNA00000019_HEVBR_ethylene_receptor:1432	Pmature358	#N/A	#N/A	miRNA n159	mRNA00000019_HEVBR_ethylene_receptor	1420	1442	1432	-33.80	-22.60	0.668639053254438	8	1-8,1442-1435;9-10,1433-1432;12-17,1430-1425;19-22,1423-1420	x-x,1434-1434[BULt];11-11,1431-1431[SIL];18-18,1424-1424[SIL]	((((.((((((.((.((((((((&))))))))-)).)))))).))))	CAUGUCUUGGGUGAUGAGAGGAG&CUCUUUUC-UCUCUUAAGUCAUG	3	0.00781972	leaf
mRNA00000002_HEVBR_constitutive_triple_response_1:1651	Pmature140910	#N/A	#N/A	miRNA n242	mRNA00000002_HEVBR_constitutive_triple_response_1	1641	1661	1651	-35.50	-23.50	0.661971830985915	8	1-5,1661-1657;6-17,1655-1644	x-x,1656-1656[BULt];18-20,1643-1641[UP3]	...((((((((((((.(((((&)))))-))))))))))))...	UAUGGGGCAUAGAGACGUGCA&UGUGC-UCUCUAUGCUUCUGU	4	0.0178296	leaf
mRNA00000002_HEVBR_constitutive_triple_response_1:452	Pmature43712	#N/A	#N/A	miRNA n243	mRNA00000002_HEVBR_constitutive_triple_response_1	441	459	452	-32.90	-21.88	0.665045592705167	13	3-6,457-454;11-21,451-441	1-2,459-458[UP5];7-10,453-452[AILq]	(((((((((((..--((((..&..))))....)))))))))))	GAGCUGGGCGCAG--CAGACG&AUUUUGAAUAGCGUCCAGCUU	4	0.0434741	flower
mRNA00000047_ACO:228	Pmature43712	#N/A	#N/A	miRNA n243	mRNA00000047_ACO	216	237	228	-32.90	-23.40	0.711246200607903	10	4-12,234-226;14-18,224-220;19-21,218-216	1-3,237-235[UP5];13-13,225-225[SIL];x-x,219-219[BULt]	(((.(((((.(((((((((...&...))))))))).)))))-)))	GGGUCUGGAGGCUGUUCAGUCU&AUUUUGAAUAGCGUCCAG-CUU	1	0.000648582	bark
mRNA00000054_HEVBR_EIN3:92	Pmature162129	#N/A	#N/A	miRNA n245	mRNA00000054_HEVBR_EIN3	81	102	92	-33.30	-21.80	0.654654654654655	13.5	5-9,98-94;10-19,92-83	1-4,102-99[UP5];x-x,93-93[BULt];20-21,82-81[UP3]	..((((((((((.(((((....&....)))))-))))))))))..	ACAAGCUGAGCCAGAGCCUACA&UUUCGGUUC-GGUUCAGUUUUG	4	0.0870437	bark
mRNA00000020_HEVBR_ethylene_receptor:1538	Pmature69079	#N/A	#N/A	miRNA n246	mRNA00000020_HEVBR_ethylene_receptor	1528	1547	1538	-37.90	-25.60	0.675461741424802	6.5	1-19,1547-1529	20-20,1528-1528[UP3]	.(((((((((((((((((((&))))))))))))))))))).	AGGUUUUUCUUGGAGAAUGG&CUGUUUUCCGAGGGAAGCCA	4	0.0589053	bark
mRNA00000020_HEVBR_ethylene_receptor:2011	Pmature128260	#N/A	#N/A	miRNA n247	mRNA00000020_HEVBR_ethylene_receptor	2000	2020	2011	-31.30	-21.90	0.699680511182109	6.5	1-9,2020-2012;11-11,2010-2010;14-21,2007-2000	10-10,2011-2011[SIL];12-13,2009-2008[SIL]	((((((((..(.(((((((((&))))))))).)..))))))))	CCGUUUCGUCUGGAUUUGAUU&AAUCGAAUCGAAUCGAAAUGG	3	0.00781972	leaf
mRNA00000055_HEVBR_EIN3:1240	Pmature12437	#N/A	#N/A	miRNA n248	mRNA00000055_HEVBR_EIN3	1227	1249	1240	-33.00	-23.90	0.724242424242424	11	1-10,1249-1240;11-16,1236-1231	x-x,1239-1237[BULt];17-20,1230-1227[UP3]	....((((((...((((((((((&))))))))))---))))))....	CCGCCUGGGUUUCCAUGACAGGA&UCUUGUCAUG---ACCCAGAAUU	0	0.000519152	leaf
mRNA00000062_HEVBR_ethylene_receptor:1626	Pmature32106	#N/A	#N/A	miRNA n249	mRNA00000062_HEVBR_ethylene_receptor	1615	1635	1626	-33.60	-24.10	0.717261904761905	3.5	1-19,1635-1617;21-21,1615-1615	20-20,1616-1616[SIL]	(.(((((((((((((((((((&))))))))))))))))))).)	AGUGGAUCGAACCGAAAUAAU&GUUAUUUCGGUUUGGUUCGGU	4	0.0298996	bark
mRNA00000068_HEVBR_EIN2:2044	Pmature107937	#N/A	#N/A	miRNA n250	mRNA00000068_HEVBR_EIN2	2033	2053	2044	-31.20	-20.60	0.66025641025641	12.5	7-21,2047-2033	1-6,2053-2048[UP5]	(((((((((((((((......&......)))))))))))))))	UUUGGGGACAGUUGUAUGAUU&AUUUUGACAACUGUUCCUGAA	4	0.0298996	bark
mRNA00000068_HEVBR_EIN2:773	Pmature125985	#N/A	#N/A	miRNA n251	mRNA00000068_HEVBR_EIN2	762	782	773	-30.90	-21.90	0.70873786407767	6	2-17,781-766;19-20,764-763	1-1,782-782[UP5];18-18,765-765[SIL];21-21,762-762[UP3]	.((.((((((((((((((((.&.)))))))))))))))).)).	CCUUAUGAACUCAGCUGCAAG&GUUGUAGUUGAGUUUGUUAGA	4	0.0298996	bark
mRNA00000002_HEVBR_constitutive_triple_response_1:1860	Pmature14015	#N/A	#N/A	miRNA n235	mRNA00000002_HEVBR_constitutive_triple_response_1	1847	1869	1860	-40.70	-29.20	0.717444717444717	7	2-14,1868-1856;17-20,1852-1849	1-1,1869-1869[UP5];15-16,1855-1853[AILt];21-22,1848-1847[UP3]	..((((...(((((((((((((.&.)))))))))))))-..))))..	ACCGUGCUGAUUGGCAUGGCUCG&UGAGCCGUGCCAAU-AUCACGUA	2	0.00491572	latex
mRNA00000007_HEVBR_CTR2:1230	Pmature39700	#N/A	#N/A	miRNA n253	mRNA00000007_HEVBR_CTR2	1220	1240	1230	-34.40	-24.00	0.697674418604651	9.5	3-8,1238-1233;10-20,1230-1220	1-2,1240-1239[UP5];9-9,1232-1231[AILt]	(((((((((((..((((((..&..))))))-.)))))))))))	GUGAUGUUGGUGUUGGUUCUU&AUGAGCCG-UACCAAUAUCAC	4	0.0298996	bark
mRNA00000007_HEVBR_CTR2:324	Pmature27317	#N/A	#N/A	miRNA n254	mRNA00000007_HEVBR_CTR2	314	333	324	-23.50	-15.60	0.663829787234043	15.5	6-16,328-318	1-5,333-329[UP5];17-20,317-314[UP3]	....(((((((((((.....&.....)))))))))))....	CGGCGACGCUGCUGAGCUUG&UAUUAUUAGUAGCGUUUUAA	4	0.0589053	bark
mRNA00000007_HEVBR_CTR2:368	Pmature78832	#N/A	#N/A	miRNA n255	mRNA00000007_HEVBR_CTR2	357	377	368	-30.10	-20.70	0.687707641196013	8.5	3-8,375-370;10-16,368-362;18-21,360-357	1-2,377-376[UP5];9-9,369-369[SIL];17-17,361-361[SIL]	((((.(((((((.((((((..&..)))))).))))))).))))	UCAUCGGAUCGAUGUAGGGCG&AUCCCUAUUUUGAUCUUAUGA	4	0.0870437	bark
mRNA00000009_ACS:50	Pmature107084	#N/A	#N/A	miRNA n256	mRNA00000009_ACS	39	60	50	-39.80	-26.46	0.664824120603015	6.5	1-7,60-54;8-12,52-48;17-21,43-39	x-x,53-53[BULt];13-16,47-44[SIL]	(((((....(((((.(((((((&)))))))-)))))....)))))	UGAGGGACAUGGGGAGAACUCC&GGAGUUC-CCCCAAACACUUCA	4	0.0238346	latex
mRNA00000011_ACO:23	Pmature26423	#N/A	#N/A	miRNA n257	mRNA00000011_ACO	10	31	23	-33.40	-21.90	0.655688622754491	8	1-8,31-24;11-13,22-20;14-21,18-11	9-10,23-23[AILq];x-x,19-19[BULt];22-22,10-10[UP3]	.((((((((.(((.-((((((((&))))))))..)))-)))))))).	CCAGUAAUUAACCU-UGAGAAGC&GCUUUUCGUUGGU-AAUUACUGA	4	0.0525408	leaf
mRNA00000014_ACS:636	Pmature155757	#N/A	#N/A	miRNA n258	mRNA00000014_ACS	625	645	636	-28.40	-18.90	0.665492957746479	12.5	6-13,640-633;15-21,631-625	1-5,645-641[UP5];14-14,632-632[SIL]	(((((((.((((((((.....&.....)))))))).)))))))	AGCCGAAGUGAAUUGAACCUU&UUUAAUCAGUUUAGUUCGGUU	2	0.0202297	bark
mRNA00000015_ACS:636	Pmature155757	#N/A	#N/A	miRNA n258	mRNA00000015_ACS	625	645	636	-28.40	-18.90	0.665492957746479	12.5	6-13,640-633;15-21,631-625	1-5,645-641[UP5];14-14,632-632[SIL]	(((((((.((((((((.....&.....)))))))).)))))))	AGCCGAAGUGAAUUGAACCUU&UUUAAUCAGUUUAGUUCGGUU	4	0.0870437	bark
mRNA00000055_HEVBR_EIN3:1240	Pmature12437	#N/A	#N/A	miRNA n248	mRNA00000055_HEVBR_EIN3	1227	1249	1240	-33.00	-23.90	0.724242424242424	11	1-10,1249-1240;11-16,1236-1231	x-x,1239-1237[BULt];17-20,1230-1227[UP3]	....((((((...((((((((((&))))))))))---))))))....	CCGCCUGGGUUUCCAUGACAGGA&UCUUGUCAUG---ACCCAGAAUU	2	0.00617774	flower
mRNA00000055_HEVBR_EIN3:1240	Pmature12437	#N/A	#N/A	miRNA n248	mRNA00000055_HEVBR_EIN3	1227	1249	1240	-33.00	-23.90	0.724242424242424	11	1-10,1249-1240;11-16,1236-1231	x-x,1239-1237[BULt];17-20,1230-1227[UP3]	....((((((...((((((((((&))))))))))---))))))....	CCGCCUGGGUUUCCAUGACAGGA&UCUUGUCAUG---ACCCAGAAUU	4	0.0119892	latex
mRNA00000039_ACO:460	Pmature165177	#N/A	#N/A	miRNA n262	mRNA00000039_ACO	449	470	460	-35.00	-24.30	0.694285714285714	8.5	3-5,468-466;6-18,464-452;20-21,450-449	1-2,470-469[UP5];x-x,465-465[BULt];19-19,451-451[SIL]	((.(((((((((((((.(((..&..)))-))))))))))))).))	GGGGUCCAACCUUUGGCACUAA&UCAGU-UUAAAGGUUGGACGCU	4	0.0178296	leaf
mRNA00000015_ACS:942	Pmature64044	gba-miR156z	atr-miR156c		mRNA00000015_ACS	931	951	942	-35.30	-23.50	0.6657223796034	7	2-10,950-942;11-17,940-934	1-1,951-951[UP5];x-x,941-941[BULt];18-20,933-931[UP3]	...(((((((.(((((((((.&.)))))))))-)))))))...	CUUCUCUCUGCUCUUCUGUCC&UGACAGAAGA-UAGAGAGCAC	2	0.0101665	bark
mRNA00000055_HEVBR_EIN3:1067	Pmature40214	#N/A	#N/A	miRNA n200	mRNA00000055_HEVBR_EIN3	1057	1076	1067	-31.40	-21.10	0.671974522292994	8	1-2,1076-1075;5-16,1072-1061;18-20,1060-1058	3-4,1074-1073[SIL];17-17,x-x[BULq];21-21,1057-1057[UP3]	.(((-((((((((((((..((&))..)))))))))))).))).	AUGG-AGAGGAUGAGGGACAG&CUUACCCUUAUCCUUUACUAA	2	0.00442901	root
mRNA00000055_HEVBR_EIN3:1240	Pmature12437	#N/A	#N/A	miRNA n248	mRNA00000055_HEVBR_EIN3	1227	1249	1240	-33.00	-23.90	0.724242424242424	11	1-10,1249-1240;11-16,1236-1231	x-x,1239-1237[BULt];17-20,1230-1227[UP3]	....((((((...((((((((((&))))))))))---))))))....	CCGCCUGGGUUUCCAUGACAGGA&UCUUGUCAUG---ACCCAGAAUU	4	0.0103668	root
mRNA00000058_HEVBR_ethylene_receptor:1546	Pmature111052	#N/A	#N/A	miRNA n67	mRNA00000058_HEVBR_ethylene_receptor	1535	1557	1546	-38.50	-25.70	0.667532467532468	11	1-7,1557-1551;8-10,1548-1546;11-16,1544-1539	x-x,1550-1549[BULt];x-x,1545-1545[BULt];17-20,1538-1535[UP3]	....((((((.(((..(((((((&)))))))--)))-))))))....	CAGAGGGUGGUAGUGAGGGCAAG&CUUGCCU--ACU-CCACCCAUUC	2	0.0202297	bark
mRNA00000007_HEVBR_CTR2:651	Pmature145701	#N/A	#N/A	miRNA n266	mRNA00000007_HEVBR_CTR2	641	661	651	-26.70	-17.40	0.651685393258427	8.5	1-6,661-656;7-17,654-644	x-x,655-655[BULt];18-20,643-641[UP3]	...(((((((((((.((((((&))))))-)))))))))))...	CUACAGAUGUCAGUAUUUUGG&UUAGAA-ACUGAUAUCUGAAA	2	0.0091825	leaf
mRNA00000018_ACS:726	Pmature38741	#N/A	#N/A	miRNA n267	mRNA00000018_ACS	715	735	726	-33.30	-24.10	0.723723723723724	5	1-12,735-724;13-16,722-719;18-21,718-715	x-x,723-723[BULt];17-17,x-x[BULq]	((((-((((.((((((((((((&))))))))))))-)))).))))	CCUC-ACUUCAUAAGCUUAGCA&UGCUGAGUUUAU-AAGUUGAGG	3	0.0155783	leaf
mRNA00000008_HEVBR_constitutive_triple_response_2:2096	Pmature58523	#N/A	#N/A	miRNA n237	mRNA00000008_HEVBR_constitutive_triple_response_2	2085	2106	2096	-23.80	-16.20	0.680672268907563	10	1-5,2106-2102;6-16,2100-2090	x-x,2101-2101[BULt];17-21,2089-2085[UP3]	.....(((((((((((.(((((&)))))-))))))))))).....	GGUUAUUGGAGAGAGGAUUGGA&UCCAA-CUUUUCUUUAAAUUUU	4	0.118326	leaf
mRNA00000008_HEVBR_constitutive_triple_response_2:65	Pmature14014	#N/A	#N/A	miRNA n269	mRNA00000008_HEVBR_constitutive_triple_response_2	49	74	65	-34.20	-22.40	0.654970760233918	10	2-2,73-73;4-15,71-60;16-21,54-49	1-1,74-74[UP5];3-3,72-72[SIL];x-x,59-55[BULt]	((((((.....((((((((((((.(.&.).))))))))))))-----))))))	CAUGGCCCACAUCGAUCAAACGAGAC&UUGUUGUUUGAUUGA-----GCCGUG	4	0.0525408	leaf
mRNA00000008_HEVBR_constitutive_triple_response_2:2096	Pmature94085	#N/A	#N/A	miRNA n270	mRNA00000008_HEVBR_constitutive_triple_response_2	2085	2106	2096	-23.80	-16.20	0.680672268907563	10	1-5,2106-2102;6-16,2100-2090	x-x,2101-2101[BULt];17-21,2089-2085[UP3]	.....(((((((((((.(((((&)))))-))))))))))).....	GGUUAUUGGAGAGAGGAUUGGA&UCCAA-CUUUUCUUUAAAUUUU	4	0.0985139	flower
mRNA00000058_HEVBR_ethylene_receptor:1841	Pmature69165	#N/A	#N/A	miRNA n271	mRNA00000058_HEVBR_ethylene_receptor	1830	1855	1841	-29.10	-19.40	0.666666666666667	20.5	5-9,1851-1847;10-20,1841-1831	1-4,1855-1852[UP5];x-x,1846-1842[BULt];21-21,1830-1830[UP3]	.(((((((((((.....(((((....&....)))))-----))))))))))).	AGUCCGACCUUUUGGAAGAGCUGUAU&AAAAAGUUU-----AAAGGUUGGACG	2	0.0301905	bark
mRNA00000018_ACS:1149	Pmature94085	#N/A	#N/A	miRNA n270	mRNA00000018_ACS	1138	1158	1149	-23.80	-17.30	0.726890756302521	5	1-9,1158-1150;11-13,1148-1146;15-21,1144-1138	10-10,1149-1149[SIL];14-14,1145-1145[SIL]	(((((((.(((.(((((((((&))))))))).))).)))))))	AAAAUUUUAGGUGAAGUUGGA&UCCAACUUUUCUUUAAAUUUU	4	0.035538	latex
mRNA00000008_HEVBR_constitutive_triple_response_2:2096	Pmature58523	#N/A	#N/A	miRNA n237	mRNA00000008_HEVBR_constitutive_triple_response_2	2085	2106	2096	-23.80	-16.20	0.680672268907563	10	1-5,2106-2102;6-16,2100-2090	x-x,2101-2101[BULt];17-21,2089-2085[UP3]	.....(((((((((((.(((((&)))))-))))))))))).....	GGUUAUUGGAGAGAGGAUUGGA&UCCAA-CUUUUCUUUAAAUUUU	3	0.0236062	latex
mRNA00000008_HEVBR_constitutive_triple_response_2:2096	Pmature58523	#N/A	#N/A	miRNA n237	mRNA00000008_HEVBR_constitutive_triple_response_2	2085	2106	2096	-23.80	-16.20	0.680672268907563	10	1-5,2106-2102;6-16,2100-2090	x-x,2101-2101[BULt];17-21,2089-2085[UP3]	.....(((((((((((.(((((&)))))-))))))))))).....	GGUUAUUGGAGAGAGGAUUGGA&UCCAA-CUUUUCUUUAAAUUUU	4	0.0703494	root
mRNA00000036_HEVBR_CTR3:667	Pmature49652	#N/A	#N/A	miRNA n275	mRNA00000036_HEVBR_CTR3	656	675	667	-27.10	-17.90	0.660516605166052	10.5	1-5,675-671;8-17,669-660	6-7,670-670[AILq];18-21,659-656[UP3]	....((((((((((.-(((((&)))))..))))))))))....	AGAAUGAAGAGAAGG-GGGCG&CGUCCAACUUUUCUUUAAAUU	2	0.0400501	bark
mRNA00000019_ACS:726	Pmature38741	#N/A	#N/A	miRNA n267	mRNA00000019_ACS	715	735	726	-33.30	-24.10	0.723723723723724	5	1-12,735-724;13-16,722-719;18-21,718-715	x-x,723-723[BULt];17-17,x-x[BULq]	((((-((((.((((((((((((&))))))))))))-)))).))))	CCUC-ACUUCAUAAGCUUAGCA&UGCUGAGUUUAU-AAGUUGAGG	4	0.0178296	leaf
mRNA00000041_ACS:404	Pmature9256	#N/A	#N/A	miRNA n277	mRNA00000041_ACS	394	413	404	-35.80	-24.70	0.689944134078212	8.5	2-6,412-408;9-11,405-403;13-21,402-394	1-1,413-413[UP5];7-8,407-406[SIL];12-12,x-x[BULq]	(((((((((-(((..(((((.&.)))))..))).)))))))))	GAGUUGCUG-ACCUUCAUUCU&UGAGUGUUGGUACAGUAACUC	4	0.0178296	leaf
mRNA00000054_HEVBR_EIN3:1388	Pmature33378	#N/A	#N/A	miRNA n278	mRNA00000054_HEVBR_EIN3	1379	1397	1388	-33.40	-21.90	0.655688622754491	8	1-11,1397-1387;14-18,1385-1381;20-21,1380-1379	12-13,1386-1386[AILq];19-19,x-x[BULq]	((-(((((.-(((((((((((&)))))))))))..))))).))	UC-CCGAUG-GUGAACUCGGC&GCUGAGUUUAUAAGUUGGUGA	3	0.00340693	latex
mRNA00000058_HEVBR_ethylene_receptor:412	young4545	ptc-miR6445b	ptc-miR6445b		mRNA00000058_HEVBR_ethylene_receptor	400	423	412	-34.40	-22.80	0.662790697674419	8	1-6,423-418;8-19,414-403;21-22,401-400	7-7,417-415[AILt];20-20,402-402[SIL]	((.((((((((((((...((((((&))))))--.)))))))))))).))	UUGAUUCCUCUUCUUCUCAAAUGG&CCAUUU--UAGGAAGAGGAAUGAA	4	0.114341	bark
mRNA00000068_HEVBR_EIN2:779	Pmature80699	#N/A	#N/A	miRNA n279	mRNA00000068_HEVBR_EIN2	769	794	779	-34.70	-23.40	0.674351585014409	16	1-8,794-787;9-17,780-772	x-x,786-781[BULt];18-20,771-769[UP3]	...(((((((((......((((((((&))))))))------)))))))))...	AACUCAGCUGCAAGUGUGUUCAACAG&CUGUUGGA------UGCAGCUGAUAA	4	0.0238346	latex
mRNA00000036_HEVBR_CTR3:669	Pmature44367	#N/A	#N/A	miRNA n280	mRNA00000036_HEVBR_CTR3	658	677	669	-30.20	-22.30	0.73841059602649	9	2-7,676-671;10-19,669-660	1-1,677-677[UP5];8-9,670-670[AILq];20-21,659-658[UP3]	..((((((((((.-((((((.&.))))))..))))))))))..	AAUGAAGAGAAGG-GGGCGCA&AGCGUCCAACUUUUCUUUAAA	4	0.0298996	bark
mRNA00000036_HEVBR_CTR3:1716	Pmature47323	#N/A	#N/A	miRNA n281	mRNA00000036_HEVBR_CTR3	1705	1729	1716	-34.40	-23.00	0.668604651162791	14	2-9,1728-1721;10-17,1716-1709;19-21,1707-1705	1-1,1729-1729[UP5];x-x,1720-1717[BULt];18-18,1708-1708[SIL]	(((.((((((((....((((((((.&.))))))))----)))))))).)))	GUGGAACCUCUUGAUGUCGCAGUCG&UGAUUGUGA----GAGAGGUUGUAU	2	0.00617774	flower
mRNA00000036_HEVBR_CTR3:396	Pmature177948	#N/A	#N/A	miRNA n282	mRNA00000036_HEVBR_CTR3	384	405	396	-30.30	-20.60	0.67986798679868	8	3-20,403-386	1-2,405-404[UP5];21-22,385-384[UP3]	..((((((((((((((((((..&..))))))))))))))))))..	GGAUCGUCAGCUAUUGAUUACA&GAUAAUUGAUAGUUGAUGAUAG	4	0.0103668	root
mRNA00000039_ACO:223	Pmature73643	#N/A	#N/A	miRNA n283	mRNA00000039_ACO	212	232	223	-32.50	-21.30	0.655384615384615	9.5	1-10,232-223;12-16,221-217	11-11,222-222[SIL];17-21,216-212[UP3]	.....(((((.((((((((((&)))))))))).))))).....	AAGGCCUUGAGGGUGUCCAAA&UUUGGACGCUGUUAAGAAUAG	4	0.0103668	root
mRNA00000054_HEVBR_EIN3:1388	Pmature33378	#N/A	#N/A	miRNA n278	mRNA00000054_HEVBR_EIN3	1379	1397	1388	-33.40	-21.90	0.655688622754491	8	1-11,1397-1387;14-18,1385-1381;20-21,1380-1379	12-13,1386-1386[AILq];19-19,x-x[BULq]	((-(((((.-(((((((((((&)))))))))))..))))).))	UC-CCGAUG-GUGAACUCGGC&GCUGAGUUUAUAAGUUGGUGA	2	0.00442901	root
mRNA00000058_HEVBR_ethylene_receptor:1546	Pmature111052	#N/A	#N/A	miRNA n67	mRNA00000058_HEVBR_ethylene_receptor	1535	1557	1546	-38.50	-25.70	0.667532467532468	11	1-7,1557-1551;8-10,1548-1546;11-16,1544-1539	x-x,1550-1549[BULt];x-x,1545-1545[BULt];17-20,1538-1535[UP3]	....((((((.(((..(((((((&)))))))--)))-))))))....	CAGAGGGUGGUAGUGAGGGCAAG&CUUGCCU--ACU-CCACCCAUUC	4	0.0353413	leaf
mRNA00000058_HEVBR_ethylene_receptor:1841	Pmature69165	#N/A	#N/A	miRNA n286	mRNA00000058_HEVBR_ethylene_receptor	1830	1855	1841	-29.10	-19.40	0.666666666666667	20.5	5-9,1851-1847;10-20,1841-1831	1-4,1855-1852[UP5];x-x,1846-1842[BULt];21-21,1830-1830[UP3]	.(((((((((((.....(((((....&....)))))-----))))))))))).	AGUCCGACCUUUUGGAAGAGCUGUAU&AAAAAGUUU-----AAAGGUUGGACG	2	0.0272953	leaf
