# Supplementary material for: Post-transcriptional regulation of several biological processes involved in latex production in Hevea brasiliensis
Source: PeerJ. 2020 Apr 29;8:e8932. doi: 10.7717/peerj.8932 (PMC7195832; doi:10.7717/peerj.8932)
Supplement: Table S15 [file peerj-08-8932-s015.xlsx]

## Sheet: 15.
CleaveLand output for ta-siRNA on transcriptome
SiteID	Query	new annotation	Transcript	TStart	TStop	TSlice	MFEperfect	MFEsite	MFEratio	AllenScore	Paired	Unpaired	Structure	Sequence	DegradomeCategory	DegradomePval	Tissue
CL11864Contig1:131	young_trees_scaffold0777_349845	ta-siRNA n17	CL11864Contig1	120	138	131	-33.70	-25.10	0.744807	5.5	2-5,137-134;8-21,133-120	1-1,138-138[UP5];6-7,x-x[BULq]	((((((((((((((--((((.&.))))..))))))))))))))	UGUGUGUGUGUGAC--ACUAA&CUAGUAAGUCACACACAUACA	4	0.00100144	Bark
CL14105Contig1:86	health_latex_scaffold0387_473398	ta-siRNA n18	CL14105Contig1	75	95	86	-35.60	-25.00	0.702247	9.5	3-7,93-89;9-18,87-78	1-2,95-94[UP5];8-8,88-88[SIL];19-21,77-75[UP3]	...((((((((((.(((((..&..))))).))))))))))...	AGACCAGUUCUCCUGGCUGCA&AAUAGCCUGGAGAAUUGGAAG	4	0.00798353	Bark
CL14185Contig1:101	health_latex_scaffold0103_1228445	ta-siRNA n19	CL14185Contig1	90	110	101	-34.00	-35.40	1	0	1-21,110-90	NA	(((((((((((((((((((((&)))))))))))))))))))))	UCAACUAAGCCUUUAUCCCAA&UUGGGAUAAAGGCUUAGUUGA	4	0.000166977	Bark
CL15361Contig1:377	health_latex_scaffold0246_1406090	ta-siRNA n20	CL15361Contig1	366	387	377	-35.00	-24.10	0.688571	5.5	1-5,387-383;6-21,381-366	x-x,382-382[BULt]	((((((((((((((((.(((((&)))))-))))))))))))))))	UCUGUUCUACUAUUUGAUUUUG&UAGGA-CAGAUAGUAGAACAGA	4	0.00200188	Bark
CL17046Contig1:203	TPD_latex_scaffold1343_48778	ta-siRNA n21	CL17046Contig1	192	212	203	-34.90	-24.70	0.707736	7	3-6,210-207;8-21,205-192	1-2,212-211[UP5];7-7,206-206[SIL]	((((((((((((((.((((..&..)))).))))))))))))))	UUCUACAGUGUCUUGCUUUUU&UCAGAGGAAGAUACUGUAGAA	4	0.00433235	Bark
CL1Contig6956:415	TPD_latex_scaffold0088_914342	ta-siRNA n22	CL1Contig6956	404	424	415	-35.70	-24.40	0.683473	6	1-3,424-422;4-8,420-416;10-20,415-405	x-x,421-421[BULt];9-9,x-x[BULq];21-21,404-404[UP3]	.(((((((((((-(((((.(((&)))-))))).))))))))))).	AGCAGUCAUGAG-UAUUAUGAU&GUC-UAAUAUCUCGUGACUGCA	4	0.0031678	Bark
CL1Contig837:764	health_latex_scaffold0201_579530	ta-siRNA n23	CL1Contig837	753	772	764	-35.40	-24.40	0.689266	9	2-7,771-766;11-21,763-753	1-1,772-772[UP5];8-10,765-764[AILq]	(((((((((((..-((((((.&.))))))...)))))))))))	GACCUGCCCAAGG-GCAAGAU&UUUUUGCAGGUUGGGUAGGUU	4	0.0413687	Bark
CL8040Contig1:275	health_latex_scaffold0603_677311	ta-siRNA n24	CL8040Contig1	265	284	275	-34.10	-23.50	0.68915	9.5	1-7,284-278;10-10,275-275;12-21,274-265	8-9,277-276[SIL];11-11,x-x[BULq]	((((((((((-(..(((((((&)))))))..).))))))))))	GGAGAGAGGG-CAUUGUAGCC&GGCUAUAUGGAUUCUCUUUCU	4	0.0250632	Bark
CL8084Contig1:396	TPD_latex_scaffold0700_56352	ta-siRNA n25	CL8084Contig1	386	405	396	-35.30	-24.02	0.680453	7	1-11,405-395;16-21,391-386	12-15,394-392[AILq]	((((((...-(((((((((((&)))))))))))....))))))	GUGCCAAAA-UAUCACGACUC&GGGUCGUGAUAAAUGUGGUAU	4	0.00947333	Bark
CL13497Contig1:19	health_latex_scaffold0997_273540	ta-siRNA n26	CL13497Contig1	8	28	19	-40.60	-29.00	0.714286	7	3-20,26-9	1-2,28-27[UP5];21-21,8-8[UP3]	.((((((((((((((((((..&..)))))))))))))))))).	AAGCUCAGCUUCUUCAUUUUU&UUGGAUGAAGGAGCUGAGCUC	4	0.00859389	leaf
CL14513Contig1:411	health_latex_scaffold0023_3239828	ta-siRNA n27	CL14513Contig1	390	420	411	-39.60	-26.30	0.664141	14	2-7,419-414;9-16,412-405;17-21,394-390	1-1,420-420[UP5];8-8,413-413[SIL];x-x,404-395[BULt]	(((((..........((((((((.((((((.&.)))))).))))))))----------)))))	GCCUCGUCGGCGCAGCAAAGCACGUUCGCCU&UGGUGAAAGUGCUUUG----------GAGGC	4	0.0354498	leaf
CL15110Contig1:35	TPD_latex_scaffold0858_100446	ta-siRNA n28	CL15110Contig1	25	44	35	-34.10	-22.20	0.651026	7.5	1-1,44-44;3-10,42-35;12-15,34-31;17-21,29-25	2-2,43-43[SIL];11-11,x-x[BULq];16-16,30-30[SIL]	(((((.((((-((((((((.(&).)))))))).)))).)))))	GGUGGGGAAU-UGGUGGCUGU&AGAGCCACUAUAUUUGCCAUU	4	0.0623143	leaf
CL1985Contig2:791	health_latex_scaffold0003_1659360	ta-siRNA n29	CL1985Contig2	781	800	791	-39.60	-25.80	0.651515	8	1-6,800-795;8-9,793-792;12-14,789-787;16-21,786-781	7-7,794-794[SIL];10-11,791-790[SIL];15-15,x-x[BULq]	((((((-(((..((.((((((&)))))).))..))).))))))	GCCUCC-AAGAUCUGUCGCCA&UGGUGAAAGUGCUUUGGAGGC	4	0.0508406	leaf
CL4321Contig3:518	TPD_latex_scaffold0253_277702	ta-siRNA n30	CL4321Contig3	505	527	518	-33.00	-23.30	0.706061	7.5	2-11,526-517;12-21,514-505	1-1,527-527[UP5];x-x,516-515[BULt]	((((((((((..((((((((((.&.))))))))))--))))))))))	GUUUGAUGUUUGUUUCUAGGCCU&UGGCCUGGAAA--AAUAUUGAAC	4	0.00195968	leaf
CL5228Contig2:205	young_trees_scaffold0093_1963088	ta-siRNA n31	CL5228Contig2	185	214	205	-34.60	-22.90	0.66185	23.5	3-11,212-204;12-19,194-187	1-2,214-213[UP5];x-x,203-195[BULt];20-21,186-185[UP3]	..((((((((.........(((((((((..&..)))))))))---------))))))))..	CCCCGUAGCAGUUUUUGGCAAUGGUCCAAA&AAUGGACCAUU---------UGUUACGGAG	4	0.0117006	leaf
CL6081Contig3:97	health_latex_scaffold0387_473398	ta-siRNA n18	CL6081Contig3	86	106	97	-35.60	-23.60	0.662921	8.5	2-17,105-90	1-1,106-106[UP5];18-21,89-86[UP3]	....((((((((((((((((.&.))))))))))))))))....	CCAACAGUUCUUUAGGCUGUA&AAUAGCCUGGAGAAUUGGAAG	4	0.0232643	leaf
CL6095Contig1:452	young_trees_scaffold0093_1963088	ta-siRNA n31	CL6095Contig1	442	461	452	-34.60	-23.10	0.66763	9	3-10,459-452;13-19,450-444	1-2,461-460[UP5];11-12,451-451[AILq];20-21,443-442[UP3]	..(((((((.-((((((((..&..))))))))..)))))))..	CACCGUAACC-AUGGUCCAGG&AAUGGACCAUUUGUUACGGAG	4	0.0105367	leaf
HSP8IRX02FWGG8483:258	health_latex_scaffold0278_712563	ta-siRNA n34	HSP8IRX02FWGG8483	246	266	258	-33.40	-22.20	0.664671	7.5	1-4,266-263;6-17,262-251;18-19,249-248	5-5,x-x[BULq];x-x,250-250[BULt];20-21,247-246[UP3]	..((.((((((((((((-((((&)))).))))))))))))-))..	CGUCAAAGUGCCUAUGG-UACC&GGUAAUCAUGGGCAUUU-GAAU	4	0.0252088	flower
HSP8IRX02G0OP3477:451	health_latex_scaffold1096_152324	ta-siRNA n35	HSP8IRX02G0OP3477	440	460	451	-42.10	-43.50	1	1	1-21,460-440	NA	(((((((((((((((((((((&)))))))))))))))))))))	CUUAGAUCCAGCCCAGUCGGC&GCUGACUGGGCUGGAUCUAAG	4	0.000297922	flower
HSP8IRX02HZ5XA499:424	health_latex_scaffold0153_49032	ta-siRNA n36	HSP8IRX02HZ5XA499	411	433	424	-29.30	-19.70	0.672355	6.5	2-10,432-424;11-21,421-411	1-1,433-433[UP5];x-x,423-422[BULt]	(((((((((((..(((((((((.&.)))))))))--)))))))))))	UUAGCAAAUAUCUCUACUUUAUU&UAUAAAGUAG--GUAUUUGCUAG	4	0.0187978	flower
HSP8IRX02IGR89454:241	health_latex_scaffold0006_2188839	ta-siRNA n37	HSP8IRX02IGR89454	229	250	241	-31.50	-21.90	0.695238	7	1-6,250-245;9-19,242-232;20-21,230-229	7-8,244-243[SIL];x-x,231-231[BULt]	((.(((((((((((..((((((&))))))..)))))))))))-))	GGAUUGGUCGAGAAAGAUCUCU&AGAGAUGAUUUUUGACCAA-CU	4	0.0114246	flower
CL10933Contig1:219	health_latex_scaffold1044_52796	ta-siRNA n38	CL10933Contig1	201	228	219	-40.7	-26.5	0.651106	20	1-5,228-224;7-11,222-218;12-19,210-203;21-21,201-201	6-6,223-223[SIL];x-x,217-211[BULt];20-20,202-202[SIL]	(,((((((((,,,,,,,(((((,(((((&))))),)))))-------)))))))),)	UGUGUGUAUGUGUUGGUGGGGUGGGGGG&CCCCUGACUCU-------CAUACACAGA	4	0.00063816	embryo
CL1117Contig3:511	young_trees_scaffold4893_5039	ta-siRNA n39	CL1117Contig3	496	520	511	-40.90	-26.78	0.654767726161369	12.5	2-11,519-510;13-16,504-501;18-21,499-496	1-1,520-520[UP5];12-12,509-505[AILt];17-17,500-500[SIL]	((((.((((.....((((((((((.&.))))))))))----.)))).))))	CUGGCAGGGAAUGGACGCUGGCAAC&CUUGCCAGCGU----ACCCUUCUAG	4	0.0141732	Latex
CL11Contig12:224	TPD_latex_scaffold0858_100404	ta-siRNA n40	CL11Contig12	213	233	224	-26.70	-18.90	0.707865168539326	12.5	5-5,229-229;7-20,227-214	1-4,233-230[UP5];6-6,228-228[SIL];21-21,213-213[UP3]	.((((((((((((((.(....&....).)))))))))))))).	UGCAUGAGAAGCAUGCGGCAA&UAAACUUAUGUUUUUCAUGCU	4	0.024756	Latex
CL11Contig16:207	TPD_latex_scaffold0858_100404	ta-siRNA n41	CL11Contig16	196	216	207	-26.70	-18.90	0.707865168539326	12.5	5-5,212-212;7-20,210-197	1-4,216-213[UP5];6-6,211-211[SIL];21-21,196-196[UP3]	.((((((((((((((.(....&....).)))))))))))))).	UGCAUGAGAAGCAUGCGGCAA&UAAACUUAUGUUUUUCAUGCU	4	0.0254349	Latex
CL11Contig2:120	TPD_latex_scaffold0526_5110	ta-siRNA n42	CL11Contig2	109	129	120	-26.70	-18.90	0.707865168539326	12.5	5-5,125-125;7-20,123-110	1-4,129-126[UP5];6-6,124-124[SIL];21-21,109-109[UP3]	.((((((((((((((.(....&....).)))))))))))))).	UGCAUGAGAAGCAUGCGGCAA&UAAACUUAUGUUUUUCAUGCU	4	0.0240767	Latex
CL11Contig7:222	TPD_latex_scaffold0526_5110	ta-siRNA n42	CL11Contig7	211	231	222	-26.70	-18.90	0.707865168539326	12.5	5-5,227-227;7-20,225-212	1-4,231-228[UP5];6-6,226-226[SIL];21-21,211-211[UP3]	.((((((((((((((.(....&....).)))))))))))))).	UGCAUGAGAAGCAUGCGGCAA&UAAACUUAUGUUUUUCAUGCU	3	0.00662901	Latex
CL284Contig4:352	young_trees_scaffold0587_303968	ta-siRNA n44	CL284Contig4	340	361	352	-44.30	-30.10	0.679458239277652	8.5	1-6,361-356;8-12,354-350;13-14,348-347;16-21,345-340	7-7,355-355[SIL];x-x,349-349[BULt];15-15,346-346[SIL]	((((((.((.(((((.((((((&)))))).)))))-)).))))))	GCUGGUGGUGGUGGUGGUGCGG&CCGUACAGCCAU-ACGACCGGC	3	0.000466633	Latex
CL7688Contig1:236	TPD_latex_scaffold0328_376788	ta-siRNA n45	CL7688Contig1	225	245	236	-38.20	-25.76	0.67434554973822	10.5	1-9,245-237;14-21,232-225	10-13,236-233[SIL]	((((((((....(((((((((&)))))))))....))))))))	UGGAUUGCUGAUGGGGUCGGC&GCUGAUCCUUGGUGUAAUCCA	4	0.0117677	Latex
CL7Contig17:234	TPD_latex_scaffold0858_100404	ta-siRNA n40	CL7Contig17	223	243	234	-26.70	-17.50	0.655430711610487	12	5-7,239-237;9-20,235-224	1-4,243-240[UP5];8-8,236-236[SIL];21-21,223-223[UP3]	.((((((((((((.(((....&....))).)))))))))))).	CGUAUGAGAAACACGAGGUAA&UAAACUUAUGUUUUUCAUGCU	0	0.00750143	Latex
CL7Contig18:267	TPD_latex_scaffold0858_100404	ta-siRNA n40	CL7Contig18	256	276	267	-26.70	-17.50	0.655430711610487	12	5-7,272-270;9-20,268-257	1-4,276-273[UP5];8-8,269-269[SIL];21-21,256-256[UP3]	.((((((((((((.(((....&....))).)))))))))))).	CGUAUGAGAAACACGAGGUAA&UAAACUUAUGUUUUUCAUGCU	3	0.0235228	Latex
CL7Contig2:232	TPD_latex_scaffold0526_5110	ta-siRNA n42	CL7Contig2	221	241	232	-26.70	-17.50	0.655430711610487	12	5-7,237-235;9-20,233-222	1-4,241-238[UP5];8-8,234-234[SIL];21-21,221-221[UP3]	.((((((((((((.(((....&....))).)))))))))))).	CGUAUGAGAAACACGAGGUAA&UAAACUUAUGUUUUUCAUGCU	3	0.0245477	Latex
CL7Contig9:340	TPD_latex_scaffold0526_5110	ta-siRNA n42	CL7Contig9	329	349	340	-26.70	-17.50	0.655430711610487	12	5-7,345-343;9-20,341-330	1-4,349-346[UP5];8-8,342-342[SIL];21-21,329-329[UP3]	.((((((((((((.(((....&....))).)))))))))))).	CGUAUGAGAAACACGAGGUAA&UAAACUUAUGUUUUUCAUGCU	4	0.0701813	Latex
CL80Contig6:1018	health_latex_scaffold0047_2108895	ta-siRNA n50	CL80Contig6	1007	1026	1018	-35.90	-23.80	0.662952646239554	6.5	2-6,1025-1021;8-17,1020-1011;19-21,1009-1007	1-1,1026-1026[UP5];7-7,x-x[BULq];18-18,1010-1010[SIL]	(((.((((((((((-(((((.&.))))).)))))))))).)))	CAGAGUGAUAGGAG-GGAGGA&ACUUCCUCUUCUAUUACCCUG	2	0.00330906	Latex
CL1471Contig2:24	health_latex_scaffold1096_152324	ta-siRNA n35	CL1471Contig2	15	33	24	-42.10	-28.70	0.681710213776722	7.5	1-10,33-24;13-18,23-18;20-21,16-15	11-12,x-x[BULq];19-19,17-17[SIL]	((.((((((--((((((((((&))))))))))..)))))).))	CUGGGAUCC--CCCGGUCGGC&GCUGACUGGGCUGGAUCUAAG	4	0.00311551	racine
CL1Contig3089:1072	health_latex_scaffold0493_317933	ta-siRNA n10	CL1Contig3089	1056	1081	1072	-34.00	-22.40	0.658823529411765	8.5	1-15,1081-1067;16-21,1061-1056	x-x,1066-1062[BULt]	((((((.....(((((((((((((((&)))))))))))))))-----))))))	UAAGGGCCUUCUCUUCUACCAAUCGU&AUGAUUGGUGGAGGA-----CUUUUA	4	0.0463969	racine
