# Supplementary material for: Post-transcriptional regulation of several biological processes involved in latex production in Hevea brasiliensis
Source: PeerJ. 2020 Apr 29;8:e8932. doi: 10.7717/peerj.8932 (PMC7195832; doi:10.7717/peerj.8932)
Supplement: Table S16 [file peerj-08-8932-s016.xlsx]

## Sheet: 16.
GO functional annotation																			GO term bark
bark	CL14105Contig1_17	c799604e9b2b0551883dee12ce88f423	195	SMART	SM01382		37	172	6.1E-58	T	2017-08-01	IPR022669	Ribosomal protein L2, C-terminal	GO:0003735|GO:0005840|GO:0006412					GO:0003735	structural constituent of ribosome	F	Molecular function
bark	CL14105Contig1_17	c799604e9b2b0551883dee12ce88f423	195	Pfam	PF03947	Ribosomal Proteins L2, C-terminal domain	39	165	7.2E-42	T	2017-08-01	IPR022669	Ribosomal protein L2, C-terminal	GO:0003735|GO:0005840|GO:0006412					GO:0005543	phospholipid binding	F	Molecular function
bark	CL14105Contig1_17	c799604e9b2b0551883dee12ce88f423	195	ProSitePatterns	PS00467	Ribosomal protein L2 signature.	138	149	-	T	2017-08-01	IPR022671	Ribosomal protein L2, conserved site	GO:0003735|GO:0005840|GO:0006412					GO:0005545	1-phosphatidylinositol binding	F	Molecular function
bark	CL14105Contig1_17	c799604e9b2b0551883dee12ce88f423	195	Gene3D	G3DSA:4.10.950.10		111	185	2.5E-31	T	2017-08-01	IPR014726	Ribosomal protein L2, domain 3						GO:0005840	ribosome	C	cellular component
bark	CL14105Contig1_17	c799604e9b2b0551883dee12ce88f423	195	SUPERFAMILY	SSF50104		40	186	6.62E-47	T	2017-08-01	IPR008991	Translation protein SH3-like domain						GO:0006412	translation	P	Biological process
bark	CL14105Contig1_17	c799604e9b2b0551883dee12ce88f423	195	Gene3D	G3DSA:2.30.30.30		31	110	5.4E-23	T	2017-08-01	IPR014722	Ribosomal protein L2 domain 2						GO:0030136	clathrin-coated vesicle	C	cellular component
bark	CL1Contig837_27	cbbf1f141ab8ec91aa4fe021a7dbac01	574	Gene3D	G3DSA:1.25.40.90		40	167	1.6E-46	T	2017-08-01	IPR008942	ENTH/VHS						GO:0030276	clathrin binding	F	Molecular function
bark	CL1Contig837_27	cbbf1f141ab8ec91aa4fe021a7dbac01	574	SUPERFAMILY	SSF48464		42	172	1.96E-37	T	2017-08-01	IPR008942	ENTH/VHS						GO:0048268	clathrin coat assembly	P	Biological process
bark	CL1Contig837_27	cbbf1f141ab8ec91aa4fe021a7dbac01	574	SMART	SM00273		40	171	1.6E-49	T	2017-08-01	IPR013809	ENTH domain
bark	CL1Contig837_27	cbbf1f141ab8ec91aa4fe021a7dbac01	574	Gene3D	G3DSA:1.20.58.150		195	322	2.6E-54	T	2017-08-01	IPR014712	Phosphoinositide-binding clathrin adaptor, domain 2	GO:0005545|GO:0030136|GO:0030276|GO:0048268
bark	CL1Contig837_27	cbbf1f141ab8ec91aa4fe021a7dbac01	574	ProSiteProfiles	PS50942	ENTH domain profile.	34	171	36.166	T	2017-08-01	IPR013809	ENTH domain
bark	CL1Contig837_27	cbbf1f141ab8ec91aa4fe021a7dbac01	574	SUPERFAMILY	SSF89009		188	319	8.63E-46	T	2017-08-01
bark	CL1Contig837_27	cbbf1f141ab8ec91aa4fe021a7dbac01	574	Pfam	PF07651	ANTH domain	41	319	7.2E-97	T	2017-08-01	IPR011417	AP180 N-terminal homology (ANTH) domain	GO:0005543
bark	CL8040Contig1_20	81fdc39ea1118e33506acd0e25f8e27c	201	Pfam	PF04134	Protein of unknown function, DUF393	119	183	7.2E-12	T	2017-08-01	IPR007263	Protein of unknown function DUF393
bark	CL14185Contig1_8	22ace2b15e47a6659d40f3e843b209d8	68	Gene3D	G3DSA:3.40.50.1820		7	68	2.2E-22	T	2017-08-01	IPR029058	Alpha/Beta hydrolase fold
bark	CL14185Contig1_8	22ace2b15e47a6659d40f3e843b209d8	68	Pfam	PF08538	Protein of unknown function (DUF1749)	9	67	1.8E-16	T	2017-08-01	IPR013744	Protein of unknown function DUF1749
																			GO term latex
latex	CL7688Contig1_7	3f28f7cedf84e745ee2c61cec3b53a3d	173	SUPERFAMILY	SSF103473		5	131	4.45E-19	T	2017-08-01	IPR020846	Major facilitator superfamily domain						GO:0000166	nucleotide binding	F	Molecular function
latex	CL7688Contig1_7	3f28f7cedf84e745ee2c61cec3b53a3d	173	Gene3D	G3DSA:1.20.1250.20		16	131	3.5E-13	T	2017-08-01								GO:0003676	nucleic acid binding	F	Molecular function
latex	CL7688Contig1_7	3f28f7cedf84e745ee2c61cec3b53a3d	173	ProSiteProfiles	PS50850	Major facilitator superfamily (MFS) profile.	17	173	14.759	T	2017-08-01	IPR020846	Major facilitator superfamily domain						GO:0004556	alpha-amylase activity	F	Molecular function
latex	CL7688Contig1_7	3f28f7cedf84e745ee2c61cec3b53a3d	173	Pfam	PF00083	Sugar (and other) transporter	18	127	1.3E-17	T	2017-08-01	IPR005828	Major facilitator, sugar transporter-like	GO:0016021|GO:0022857|GO:0055085					GO:0005509	calcium ion binding	F	Molecular function
latex	CL80Contig6_13	c4644b40ca732338a769b942dc655c31	405	Pfam	PF00076	RNA recognition motif. (a.k.a. RRM, RBD, or RNP domain)	74	143	7.0E-21	T	2017-08-01	IPR000504	RNA recognition motif domain	GO:0003676					GO:0005975	carbohydrate metabolic process	P	Biological process
latex	CL80Contig6_13	c4644b40ca732338a769b942dc655c31	405	SUPERFAMILY	SSF90229		169	191	2.49E-5	T	2017-08-01	IPR000571	Zinc finger, CCCH-type	GO:0046872					GO:0006950	response to stress	P	Biological process
latex	CL80Contig6_13	c4644b40ca732338a769b942dc655c31	405	Coils	Coil		151	171	-	T	2017-08-01								GO:0016021	integral component of membrane	C	cellular component
latex	CL80Contig6_13	c4644b40ca732338a769b942dc655c31	405	SMART	SM00356		168	192	2.1E-5	T	2017-08-01	IPR000571	Zinc finger, CCCH-type	GO:0046872					GO:0022857	transmembrane transporter activity	F	Molecular function
latex	CL80Contig6_13	c4644b40ca732338a769b942dc655c31	405	SUPERFAMILY	SSF54928		63	152	3.9E-28	T	2017-08-01	IPR012677	Nucleotide-binding alpha-beta plait domain	GO:0000166					GO:0046872	metal ion binding	F	Molecular function
latex	CL80Contig6_13	c4644b40ca732338a769b942dc655c31	405	Gene3D	G3DSA:3.30.70.330		70	159	2.0E-25	T	2017-08-01	IPR012677	Nucleotide-binding alpha-beta plait domain	GO:0000166					GO:0055085	transmembrane transport	P	Biological process
latex	CL80Contig6_13	c4644b40ca732338a769b942dc655c31	405	ProSiteProfiles	PS50103	Zinc finger C3H1-type profile.	166	193	15.469	T	2017-08-01	IPR000571	Zinc finger, CCCH-type	GO:0046872
latex	CL80Contig6_13	c4644b40ca732338a769b942dc655c31	405	Pfam	PF00642	Zinc finger C-x8-C-x5-C-x3-H type (and similar)	171	191	1.2E-6	T	2017-08-01	IPR000571	Zinc finger, CCCH-type	GO:0046872
latex	CL80Contig6_13	c4644b40ca732338a769b942dc655c31	405	ProSiteProfiles	PS50102	Eukaryotic RNA Recognition Motif (RRM) profile.	72	150	20.048	T	2017-08-01	IPR000504	RNA recognition motif domain	GO:0003676
latex	CL80Contig6_13	c4644b40ca732338a769b942dc655c31	405	SMART	SM00360		73	146	8.5E-27	T	2017-08-01	IPR000504	RNA recognition motif domain	GO:0003676
latex	CL80Contig6_13	c4644b40ca732338a769b942dc655c31	405	Gene3D	G3DSA:4.10.1000.10		171	193	1.5E-5	T	2017-08-01	IPR000571	Zinc finger, CCCH-type	GO:0046872
latex	CL1117Contig3_4	0b36ddfd3eb816093bbf3c6eb78b538d	107	SUPERFAMILY	SSF51445		7	107	7.86E-22	T	2017-08-01	IPR017853	Glycoside hydrolase superfamily
latex	CL1117Contig3_4	0b36ddfd3eb816093bbf3c6eb78b538d	107	Gene3D	G3DSA:3.20.20.80		2	107	4.9E-20	T	2017-08-01	IPR013781	Glycoside hydrolase, catalytic domain	GO:0005975
latex	CL284Contig4_9	06961f2b780e0ddda235d98c64165416	95	Pfam	PF00428	60s Acidic ribosomal protein	25	94	1.1E-19	T	2017-08-01
latex	CL7Contig18_6	50ef8f5fd1b0c0ade2d0766c5f12aa46	67	Pfam	PF02496	ABA/WDS induced protein	38	65	4.2E-7	T	2017-08-01	IPR003496	ABA/WDS induced protein	GO:0006950
latex	CL7Contig17_5	50ef8f5fd1b0c0ade2d0766c5f12aa46	67	Pfam	PF02496	ABA/WDS induced protein	38	65	4.2E-7	T	2017-08-01	IPR003496	ABA/WDS induced protein	GO:0006950
latex	CL7Contig9_7	50ef8f5fd1b0c0ade2d0766c5f12aa46	67	Pfam	PF02496	ABA/WDS induced protein	38	65	4.2E-7	T	2017-08-01	IPR003496	ABA/WDS induced protein	GO:0006950
latex	CL7Contig2_5	50ef8f5fd1b0c0ade2d0766c5f12aa46	67	Pfam	PF02496	ABA/WDS induced protein	38	65	4.2E-7	T	2017-08-01	IPR003496	ABA/WDS induced protein	GO:0006950
latex	CL1117Contig3_7	1c0d73bb48d73ce03d69ab4120443dba	120	SUPERFAMILY	SSF51011		66	119	3.31E-17	T	2017-08-01
latex	CL1117Contig3_7	1c0d73bb48d73ce03d69ab4120443dba	120	Gene3D	G3DSA:2.60.40.1180		66	119	7.3E-21	T	2017-08-01	IPR013780	Glycosyl hydrolase, all-beta
latex	CL1117Contig3_7	1c0d73bb48d73ce03d69ab4120443dba	120	Pfam	PF07821	Alpha-amylase C-terminal beta-sheet domain	63	119	8.9E-23	T	2017-08-01	IPR012850	Alpha-amylase, C-terminal beta-sheet	GO:0004556|GO:0005509|GO:0005975
latex	CL1117Contig3_7	1c0d73bb48d73ce03d69ab4120443dba	120	SMART	SM00810		62	120	1.6E-28	T	2017-08-01	IPR012850	Alpha-amylase, C-terminal beta-sheet	GO:0004556|GO:0005509|GO:0005975
latex	CL11Contig16_7	5a0ecaf00c35e0ef4afaab9ccda20292	148	Pfam	PF02496	ABA/WDS induced protein	39	113	1.6E-33	T	2017-08-01	IPR003496	ABA/WDS induced protein	GO:0006950
latex	CL11Contig12_6	cfa1daf45ca36b2479bab7e198699578	99	Pfam	PF02496	ABA/WDS induced protein	45	91	1.7E-18	T	2017-08-01	IPR003496	ABA/WDS induced protein	GO:0006950
latex	CL11Contig2_5	5c35e34720f17fb742dd7795108449a6	84	Pfam	PF02496	ABA/WDS induced protein	10	83	8.0E-34	T	2017-08-01	IPR003496	ABA/WDS induced protein	GO:0006950
latex	CL11Contig7_8	40de74227ef90d6b9d31c88151a9abf8	151	Pfam	PF02496	ABA/WDS induced protein	44	118	1.6E-33	T	2017-08-01	IPR003496	ABA/WDS induced protein	GO:0006950
																			GO term reproductive tissues
Flower	HSP8IRX02HZ5XA499_5	924316cd3b0669375883f67be4023072	93	Gene3D	G3DSA:2.20.25.100		37	91	9.8E-35	T	2017-08-01	IPR023407	Ribosomal protein S27e, zinc-binding domain						GO:0003735	structural constituent of ribosome	F	Molecular function
Flower	HSP8IRX02HZ5XA499_5	924316cd3b0669375883f67be4023072	93	SUPERFAMILY	SSF57829		37	91	1.1E-21	T	2017-08-01	IPR011332	Zinc-binding ribosomal protein	GO:0006412					GO:0005622	intracellular	C	cellular component
Flower	HSP8IRX02HZ5XA499_5	924316cd3b0669375883f67be4023072	93	Hamap	MF_00371	30S ribosomal protein S27e [rps27e].	31	91	16.744	T	2017-08-01	IPR000592	Ribosomal protein S27e	GO:0003735|GO:0005622|GO:0005840|GO:0006412					GO:0005840	ribosome	C	cellular component
Flower	HSP8IRX02HZ5XA499_5	924316cd3b0669375883f67be4023072	93	ProSitePatterns	PS01168	Ribosomal protein S27e signature.	45	77	-	T	2017-08-01	IPR000592	Ribosomal protein S27e	GO:0003735|GO:0005622|GO:0005840|GO:0006412					GO:0006412	translation	P	Biological process
Flower	HSP8IRX02HZ5XA499_5	924316cd3b0669375883f67be4023072	93	ProDom	PD004466	RIBOSOMAL ZINC METAL-BINDING ZINC-FINGER RIBONUCLEOPROTEIN 40S S27 S27 S27E SEQUENCE	53	91	4.0E-16	T	2017-08-01	IPR000592	Ribosomal protein S27e	GO:0003735|GO:0005622|GO:0005840|GO:0006412					GO:0008137	NADH dehydrogenase (ubiquinone) activity	F	Molecular function
Flower	HSP8IRX02HZ5XA499_5	924316cd3b0669375883f67be4023072	93	Pfam	PF01667	Ribosomal protein S27	37	91	2.6E-27	T	2017-08-01	IPR000592	Ribosomal protein S27e	GO:0003735|GO:0005622|GO:0005840|GO:0006412					GO:0042773	ATP synthesis coupled electron transport	P	Biological process
Flower	HSP8IRX02G0OP3477_17	45519460dc8652211d153076c6be220b	158	SUPERFAMILY	SSF56672		4	107	3.91E-7	T	2017-08-01								GO:0055114	oxidation-reduction process	P	Biological process
Flower	HSP8IRX02FWGG8483_5	d84478193c88d12e8653f097c21a9d74	158	PRINTS	PR01437	NADH-ubiquinone oxidoreductase subunit 4 signature	99	123	7.5E-22	T	2017-08-01	IPR003918	NADH:ubiquinone oxidoreductase	GO:0008137|GO:0042773|GO:0055114
Flower	HSP8IRX02FWGG8483_5	d84478193c88d12e8653f097c21a9d74	158	PRINTS	PR01437	NADH-ubiquinone oxidoreductase subunit 4 signature	30	54	7.5E-22	T	2017-08-01	IPR003918	NADH:ubiquinone oxidoreductase	GO:0008137|GO:0042773|GO:0055114
Flower	HSP8IRX02FWGG8483_5	d84478193c88d12e8653f097c21a9d74	158	Coils	Coil		155	158	-	T	2017-08-01
Flower	HSP8IRX02FWGG8483_5	d84478193c88d12e8653f097c21a9d74	158	Pfam	PF00361	Proton-conducting membrane transporter	10	135	5.9E-35	T	2017-08-01	IPR001750	NADH:quinone oxidoreductase/Mrp antiporter, membrane subunit		Reactome: REACT_6305
																			GO term leaf
Leaf	CL6081Contig3_8	ce74f0f71657764ce7cfa974edc01b33	87	SUPERFAMILY	SSF51430		2	61	2.1E-17	T	2017-08-01	IPR023210	NADP-dependent oxidoreductase domain						GO:0000902	cell morphogenesis	P	Biological process
Leaf	CL6081Contig3_8	ce74f0f71657764ce7cfa974edc01b33	87	ProSitePatterns	PS00063	Aldo/keto reductase family putative active site signature.	27	42	-	T	2017-08-01	IPR018170	Aldo/keto reductase, conserved site	GO:0016491|GO:0055114					GO:0003824	catalytic activity	F	Molecular function
Leaf	CL6081Contig3_8	ce74f0f71657764ce7cfa974edc01b33	87	Gene3D	G3DSA:3.20.20.100		2	63	2.8E-21	T	2017-08-01	IPR023210	NADP-dependent oxidoreductase domain						GO:0005524	ATP binding	F	Molecular function
Leaf	CL6081Contig3_8	ce74f0f71657764ce7cfa974edc01b33	87	Pfam	PF00248	Aldo/keto reductase family	2	58	3.0E-11	T	2017-08-01	IPR023210	NADP-dependent oxidoreductase domain						GO:0005622	intracellular	C	cellular component
Leaf	CL4321Contig3_5	58c2277e6acb09a24f38e5057f467b8b	80	SUPERFAMILY	SSF69340		5	79	2.75E-24	T	2017-08-01	IPR013912	Adenylate cyclase-associated CAP, C-terminal	GO:0003779|GO:0007010	Reactome: REACT_18266				GO:0008270	zinc ion binding	F	Molecular function
Leaf	CL4321Contig3_5	58c2277e6acb09a24f38e5057f467b8b	80	Gene3D	G3DSA:2.160.20.70		6	78	3.1E-25	T	2017-08-01	IPR016098	Cyclase-associated protein CAP/septum formation inhibitor MinC, C-terminal	GO:0000902					GO:0009116	nucleoside metabolic process	P	Biological process
Leaf	CL4321Contig3_5	58c2277e6acb09a24f38e5057f467b8b	80	ProSiteProfiles	PS51329	C-CAP/cofactor C-like domain profile.	1	57	14.435	T	2017-08-01	IPR017901	C-CAP/cofactor C-like domain						GO:0015986	ATP synthesis coupled proton transport	P	Biological process
Leaf	CL4321Contig3_5	58c2277e6acb09a24f38e5057f467b8b	80	Pfam	PF08603	Adenylate cyclase associated (CAP) C terminal	5	77	1.4E-22	T	2017-08-01	IPR013912	Adenylate cyclase-associated CAP, C-terminal	GO:0003779|GO:0007010	Reactome: REACT_18266				GO:0015991	ATP hydrolysis coupled proton transport	P	Biological process
Leaf	CL14513Contig1_20	095b3ad87b7574b9fbf114413193c227	96	Pfam	PF00643	B-box zinc finger	8	52	2.6E-5	T	2017-08-01	IPR000315	B-box-type zinc finger	GO:0005622|GO:0008270					GO:0016491	oxidoreductase activity	F	Molecular function
Leaf	CL14513Contig1_20	095b3ad87b7574b9fbf114413193c227	96	ProSiteProfiles	PS50119	Zinc finger B-box type profile.	5	52	10.68	T	2017-08-01	IPR000315	B-box-type zinc finger	GO:0005622|GO:0008270					GO:0016820	hydrolase activity, acting on acid anhydrides, catalyzing transmembrane movement of substances	F	Molecular function
Leaf	CL14513Contig1_20	095b3ad87b7574b9fbf114413193c227	96	SMART	SM00336		5	52	2.0E-12	T	2017-08-01	IPR000315	B-box-type zinc finger	GO:0005622|GO:0008270					GO:0033178	proton-transporting two-sector ATPase complex, catalytic domain	C	cellular component
Leaf	CL1985Contig2_33	c08cebd8d92109785a7e4388e5848dd3	274	Pfam	PF00006	ATP synthase alpha/beta family, nucleotide-binding domain	8	150	1.0E-42	T	2017-08-01	IPR000194	ATPase, F1/V1/A1 complex, alpha/beta subunit, nucleotide-binding domain	GO:0005524					GO:0046933	proton-transporting ATP synthase activity, rotational mechanism	F	Molecular function
Leaf	CL1985Contig2_33	c08cebd8d92109785a7e4388e5848dd3	274	Gene3D	G3DSA:1.10.1140.10		153	272	3.4E-61	T	2017-08-01	IPR024034	ATPase, F1 complex beta subunit/V1 complex, C-terminal						GO:0055114	oxidation-reduction process	P	Biological process
Leaf	CL1985Contig2_33	c08cebd8d92109785a7e4388e5848dd3	274	ProSitePatterns	PS00152	ATP synthase alpha and beta subunits signature.	141	150	-	T	2017-08-01	IPR020003	ATPase, alpha/beta subunit, nucleotide-binding domain, active site	GO:0005524
Leaf	CL1985Contig2_33	c08cebd8d92109785a7e4388e5848dd3	274	TIGRFAM	TIGR01039	atpD: ATP synthase F1, beta subunit	9	268	3.2E-153	T	2017-08-01	IPR005722	ATPase, F1 complex, beta subunit	GO:0015986|GO:0046933
Leaf	CL1985Contig2_33	c08cebd8d92109785a7e4388e5848dd3	274	Gene3D	G3DSA:3.40.50.300		8	152	4.9E-60	T	2017-08-01	IPR027417	P-loop containing nucleoside triphosphate hydrolase
Leaf	CL1985Contig2_33	c08cebd8d92109785a7e4388e5848dd3	274	SUPERFAMILY	SSF52540		8	156	9.03E-49	T	2017-08-01	IPR027417	P-loop containing nucleoside triphosphate hydrolase
Leaf	CL1985Contig2_33	c08cebd8d92109785a7e4388e5848dd3	274	SUPERFAMILY	SSF47917		153	269	9.16E-53	T	2017-08-01	IPR000793	ATPase, F1/V1/A1 complex, alpha/beta subunit, C-terminal	GO:0015991|GO:0016820|GO:0033178
Leaf	CL4321Contig3_2	510b7e88d9723c7f4648e0ea5e7e9eb1	53	ProSiteProfiles	PS51329	C-CAP/cofactor C-like domain profile.	1	53	12.37	T	2017-08-01	IPR017901	C-CAP/cofactor C-like domain
Leaf	CL4321Contig3_2	510b7e88d9723c7f4648e0ea5e7e9eb1	53	SUPERFAMILY	SSF69340		1	39	1.57E-10	T	2017-08-01	IPR013912	Adenylate cyclase-associated CAP, C-terminal	GO:0003779|GO:0007010	Reactome: REACT_18266
Leaf	CL4321Contig3_2	510b7e88d9723c7f4648e0ea5e7e9eb1	53	Gene3D	G3DSA:2.160.20.70		1	40	1.7E-12	T	2017-08-01	IPR016098	Cyclase-associated protein CAP/septum formation inhibitor MinC, C-terminal	GO:0000902
Leaf	CL4321Contig3_2	510b7e88d9723c7f4648e0ea5e7e9eb1	53	Pfam	PF08603	Adenylate cyclase associated (CAP) C terminal	1	40	8.4E-11	T	2017-08-01	IPR013912	Adenylate cyclase-associated CAP, C-terminal	GO:0003779|GO:0007010	Reactome: REACT_18266
Leaf	CL5228Contig2_10	6340a421b141b2add8586d684166e699	60	Pfam	PF13193	AMP-binding enzyme C-terminal domain	7	39	2.3E-5	T	2017-08-01	IPR025110	AMP-binding enzyme C-terminal domain
Leaf	CL5228Contig2_10	6340a421b141b2add8586d684166e699	60	SUPERFAMILY	SSF56801		5	51	4.58E-11	T	2017-08-01
Leaf	CL5228Contig2_10	6340a421b141b2add8586d684166e699	60	Gene3D	G3DSA:3.30.300.30		6	52	2.6E-11	T	2017-08-01
Leaf	CL15110Contig1_3	e92066269c185cfb10d391ff0d3e3015	95	Gene3D	G3DSA:3.40.50.1580		35	93	3.9E-5	T	2017-08-01	IPR000845	Nucleoside phosphorylase domain	GO:0003824|GO:0009116
Leaf	CL15110Contig1_3	e92066269c185cfb10d391ff0d3e3015	95	Pfam	PF01048	Phosphorylase superfamily	39	95	3.8E-6	T	2017-08-01	IPR000845	Nucleoside phosphorylase domain	GO:0003824|GO:0009116
																			GO term root
Root	CL1Contig3089_32	5656bafc842482bd1b5e79545e063053	324	Coils	Coil		112	171	-	T	2017-08-01								GO:0046872	metal ion binding	F	Molecular function
Root	CL1Contig3089_32	5656bafc842482bd1b5e79545e063053	324	Coils	Coil		80	100	-	T	2017-08-01
Root	CL1471Contig2_22	b09d60a2a3e9af442bb09810a3d78a67	446	ProSitePatterns	PS00518	Zinc finger RING-type signature.	88	97	-	T	2017-08-01	IPR017907	Zinc finger, RING-type, conserved site
Root	CL1471Contig2_22	b09d60a2a3e9af442bb09810a3d78a67	446	ProSiteProfiles	PS50157	Zinc finger C2H2 type domain profile.	123	149	8.663	T	2017-08-01	IPR007087	Zinc finger, C2H2	GO:0046872
Root	CL1471Contig2_22	b09d60a2a3e9af442bb09810a3d78a67	446	ProSitePatterns	PS00028	Zinc finger C2H2 type domain signature.	125	148	-	T	2017-08-01	IPR007087	Zinc finger, C2H2	GO:0046872
