# Supplementary material for: Post-transcriptional regulation of several biological processes involved in latex production in Hevea brasiliensis
Source: PeerJ. 2020 Apr 29;8:e8932. doi: 10.7717/peerj.8932 (PMC7195832; doi:10.7717/peerj.8932)
Supplement: Table S18 [file peerj-08-8932-s018.xlsx]

## Sheet: 18.
CleaveLand output for ta-siRNA activity on genes from AP2/ERF familly in Hevea
SiteID	Query	New annotation	Transcript	ERF name	TStart	TStop	TSlice	MFEperfect	MFEsite	MFEratio	AllenScore	Paired	Unpaired	Structure	Sequence	DegradomeCategory	DegradomePval	Tissue
hevea_454_rep_c12109:457	health_latex_scaffold0005_1649147	ta-siRNA n56	hevea_454_rep_c12109	HbERF-IXc01	446	466	457	-39.00	-25.80	0.661538461538462	8.5	4-14,463-453;16-20,451-447	1-3,466-464[UP5];15-15,452-452[SIL];21-21,446-446[UP3]	.(((((.(((((((((((...&...))))))))))).))))).	UUCAGGAGGGCCUUAGAGCCA&CAACUCUAAGGCCCAUUUGGG	0	0.000567193	bark
hevea_454_rep_c25450:910	health_latex_scaffold0239_292569	ta-siRNA n57	hevea_454_rep_c25450	HbERF-IXb05	898	919	910	-31.50	-22.20	0.704761904761905	5.5	1-15,919-905;16-18,903-901;21-21,898-898	x-x,904-904[BULt];19-20,900-899[SIL]	(..(((.(((((((((((((((&)))))))))))))))-)))..)	GGUAGCGUUGACUAUUCCUUGG&UUAAGGAAUAGUUAG-GCUUAC	4	0.016107	bark
hevea_454_rep_c27017:529	health_latex_scaffold0047_2108897	ta-siRNA n58	hevea_454_rep_c27017	HbERF-IXc07	518	539	529	-35.60	-24.80	0.696629213483146	12	1-3,539-537;8-19,531-520	4-7,536-532[AILt];20-21,519-518[UP3]	..((((((((((((.....(((&)))-....))))))))))))..	UAACUUCCUCUUCUUUAGUCCC&GGG-UAAUAGAAGAGGAAGUAG	4	0.0779821	bark
hevea_454_rep_c7722:422	young_trees_scaffold0063_2665117	ta-siRNA n59	hevea_454_rep_c7722	HbERF-IIIe02	410	431	422	-48.60	-32.20	0.662551440329218	9	3-10,429-422;11-17,420-414;19-20,412-411	1-2,431-430[UP5];x-x,421-421[BULt];18-18,413-413[SIL];21-21,410-410[UP3]	.((.(((((((.((((((((..&..))))))))-))))))).)).	CUCGUCCUCCGACCCAGUCGAU&GGUGGCUGGG-CGGAGGAGGAA	4	0.016107	bark
hevea_454_c50010:1010	young_trees_scaffold0616_548652	ta-siRNA n60	hevea_454_c50010	HbAP2-15	999	1024	1010	-31.80	-20.80	0.654088050314465	17	2-9,1023-1016;12-21,1008-999	1-1,1024-1024[UP5];10-11,1015-1009[AILt]	((((((((((.......((((((((.&.))))))))-----..))))))))))	GACAAGGGAAAAAAGGGGGCGAAGUA&GACUUCGUC-----AAUUUCUUUGUC	3	0.0181302	leaf
hevea_454_rep_c19971:572	young_trees_scaffold0299_70336	ta-siRNA n61	hevea_454_rep_c19971	HbERF-IIb02	560	581	572	-39.50	-25.70	0.650632911392405	11.5	5-11,577-571;12-21,569-560	1-4,581-578[UP5];x-x,570-570[BULt]	((((((((((.(((((((....&....)))))))-))))))))))	GACUCACCUGUGCUUGUAUUAG&UGUUUACAGGU-CGGGUGAGUC	4	0.00827586	flower
hevea_454_rep_c64305:219	health_latex_scaffold0015_261549	ta-siRNA n62	hevea_454_rep_c64305	HbERF-VIIa9	209	229	219	-31.30	-20.70	0.661341853035144	5.5	2-6,228-224;7-12,222-217;14-21,216-209	1-1,229-229[UP5];x-x,223-223[BULt];13-13,x-x[BULq]	((((((((-((((((.(((((.&.)))))-)))))).))))))))	UCCACAGG-UCCAUUGGAUUUC&AAAAUU-AAUGGAGCUUGUGGA	4	0.00749673	latex
hevea_454_rep_c8782:322	health_latex_scaffold0201_579551	ta-siRNA n63	hevea_454_rep_c8782	HbRAV-03	311	331	322	-40.40	-26.60	0.658415841584158	11	4-7,328-325;9-19,323-313	1-3,331-329[UP5];8-8,324-324[SIL];20-21,312-311[UP3]	..(((((((((((.((((...&...)))).)))))))))))..	CCGAGUCUCCUCUUUGCCGUG&CUAGGUAUAGGGGAGACUCUG	3	0.00110322	latex
hevea_454_rep_c37727:261	young_trees_scaffold0616_548444	ta-siRNA n64	hevea_454_rep_c37727	HbERF-Vb02	250	272	261	-39.20	-25.60	0.653061224489796	8.5	1-7,272-266;8-9,264-263;10-13,261-258;15-20,256-251	x-x,265-265[BULt];x-x,262-262[BULt];14-14,257-257[SIL];21-21,250-250[UP3]	.((((((.((((.((.(((((((&)))))))-))-)))).)))))).	CUGCUUGCUUGCUUCGCGGUGCC&GGUACUG-GA-GCAAACAAGCGA	4	0.00646471	root
