# Supplementary material for: Post-transcriptional regulation of several biological processes involved in latex production in Hevea brasiliensis
Source: PeerJ. 2020 Apr 29;8:e8932. doi: 10.7717/peerj.8932 (PMC7195832; doi:10.7717/peerj.8932)
Supplement: Table S20 [file peerj-08-8932-s020.xlsx]

## Sheet: 20.
CleaveLand output for ta-siRNA activity on genes involved in ethylene signaling
SiteID	Query	New annotation	Transcript	TStart	TStop	TSlice	MFEperfect	MFEsite	MFEratio	AllenScore	Paired	Unpaired	Structure	Sequence	DegradomeCategory	DegradomePval	Tissue
mRNA00000019_ACS:473	health_latex_scaffold2565_7150	ta-siRNA n74	mRNA00000019_ACS	461	482	473	-34.60	-24.50	0.708092485549133	9.5	3-11,480-472;13-21,469-461	1-2,482-481[UP5];12-12,471-470[AILt]	(((((((((..(((((((((..&..)))))))))-.)))))))))	CCGAGGUUGAAAUUGUUCCAAU&AAUGGAAUAGU-GCAACUUCGG	4	0.0298996	bark
mRNA00000019_HEVBR_ethylene_receptor:278	health_latex_scaffold4122_4253	ta-siRNA n75	mRNA00000019_HEVBR_ethylene_receptor	267	287	278	-33.00	-21.70	0.657575757575758	8	1-6,287-282;9-21,279-267	7-8,281-280[SIL]	(((((((((((((..((((((&))))))..)))))))))))))	UUGUGGAUUGACUCAUUUGCU&GGUAAAGAAGUUAGUCCAUAG	2	0.0101665	bark
mRNA00000054_HEVBR_EIN3:1760	young_trees_scaffold0071_275134	ta-siRNA n76	mRNA00000054_HEVBR_EIN3	1749	1769	1760	-24.90	-16.80	0.674698795180723	10	2-7,1768-1763;9-16,1761-1754	1-1,1769-1769[UP5];8-8,1762-1762[SIL];17-21,1753-1749[UP3]	.....((((((((.((((((.&.)))))).)))))))).....	CAAUCUGAUGUUUGGCUCUCC&AGAGAGUAAAAUAUCAAUUUU	4	0.0298996	bark
mRNA00000068_HEVBR_EIN2:811	health_latex_scaffold0418_885144	ta-siRNA n77	mRNA00000068_HEVBR_EIN2	800	822	811	-38.40	-25.40	0.661458333333333	9	1-4,822-819;5-13,816-808;16-21,805-800	x-x,818-817[BULt];14-15,807-806[SIL]	((((((..(((((((((..((((&))))--)))))))))..))))))	GCCUUGUUUUGCUCACUUUUCCU&AGGA--AGUGGGUAAUUCAGGGU	4	0.0178296	leaf
mRNA00000008_HEVBR_constitutive_triple_response_2:1686	health_latex_scaffold0111_108983	ta-siRNA n78	mRNA00000008_HEVBR_constitutive_triple_response_2	1676	1695	1686	-37.00	-24.10	0.651351351351351	8.5	1-8,1695-1688;11-11,1685-1685;14-20,1683-1677	9-10,1687-1686[SIL];12-13,1684-1684[AILq];21-21,1676-1676[UP3]	.(((((((.-(..((((((((&))))))))..)..))))))).	CCAGCUCUA-CUAUUCCCGAG&CUCGGGAAGUGAAAGAGUUGA	4	0.0147066	flower
mRNA00000019_ACS:473	health_latex_scaffold0006_762159	ta-siRNA n79	mRNA00000019_ACS	461	482	473	-34.60	-24.50	0.708092485549133	9.5	3-11,480-472;13-21,469-461	1-2,482-481[UP5];12-12,471-470[AILt]	(((((((((..(((((((((..&..)))))))))-.)))))))))	CCGAGGUUGAAAUUGUUCCAAU&AAUGGAAUAGU-GCAACUUCGG	4	0.0147066	flower
mRNA00000024_HEVBR_ethylene_receptor:1594	TPD_latex_scaffold0026_3373155	ta-siRNA n80	mRNA00000024_HEVBR_ethylene_receptor	1584	1603	1594	-33.00	-23.40	0.709090909090909	7.5	1-2,1603-1602;5-11,1599-1593;13-21,1592-1584	3-4,1601-1600[SIL];12-12,x-x[BULq]	(((((((((-(((((((..((&))..))))))).)))))))))	ACCAAAUGC-UCCUGAGGAGU&ACAACUUAGGACGUAUUUGGU	4	0.0147066	flower
mRNA00000062_HEVBR_ethylene_receptor:958	young_trees_scaffold0587_304178	ta-siRNA n5	mRNA00000062_HEVBR_ethylene_receptor	946	967	958	-35.60	-23.90	0.671348314606741	8.5	2-12,966-956;15-21,952-946	1-1,967-967[UP5];13-14,955-953[AILt]	(((((((...(((((((((((.&.)))))))))))-..)))))))	UCUAUGCGGGCACGUGAUCAGC&UUUGGUCAUGUG-AAGCGUAGA	4	0.0147066	flower
mRNA00000068_HEVBR_EIN2:3282	young_trees_scaffold0587_304178	ta-siRNA n5	mRNA00000068_HEVBR_EIN2	3271	3291	3282	-35.60	-23.80	0.668539325842697	6.5	2-14,3290-3278;16-18,3276-3274	1-1,3291-3291[UP5];15-15,3277-3277[SIL];19-21,3273-3271[UP3]	...(((.(((((((((((((.&.))))))))))))).)))...	CGCAUGGUUCACAUGGCCAAC&UUUGGUCAUGUGAAGCGUAGA	4	0.0291969	flower
mRNA00000002_HEVBR_constitutive_triple_response_1:1202	health_latex_scaffold0342_969474	ta-siRNA n83	mRNA00000002_HEVBR_constitutive_triple_response_1	1191	1211	1202	-29.20	-19.40	0.664383561643836	7	1-17,1211-1195	18-21,1194-1191[UP3]	....(((((((((((((((((&)))))))))))))))))....	GAAGUCAGGUUGUUUAUGUGA&UCAUAUAAAUAACUUGGGAAC	4	0.00632367	embryo
mRNA00000008_HEVBR_constitutive_triple_response_2:633	young_trees_scaffold0901_420550	ta-siRNA n84	mRNA00000008_HEVBR_constitutive_triple_response_2	622	641	633	-35.20	-23.60	0.670454545454545	8	1-2,641-640;4-4,638-638;6-21,637-622	3-3,639-639[SIL];5-5,x-x[BULq]	((((((((((((((((-(.((&)).).))))))))))))))))	AUUGCUCUAGAUUGCC-CUGC&GUUGUGGUAAUUUGGAGCAGU	4	0.00632367	embryo
mRNA00000036_HEVBR_CTR3:1400	TPD_latex_scaffold0004_104876	ta-siRNA n85	mRNA00000036_HEVBR_CTR3	1390	1409	1400	-41.00	-28.80	0.702439024390244	6	1-7,1409-1403;9-15,1401-1395;17-21,1394-1390	8-8,1402-1402[SIL];16-16,x-x[BULq]	(((((-(((((((.(((((((&))))))).))))))).)))))	GUUGA-UCUAGUUGGGCAGCC&GGCUGCCGGAUUGGACUUAAC	4	0.0119892	latex
mRNA00000049_ACS:378	health_latex_scaffold0047_2108895	ta-siRNA n50	mRNA00000049_ACS	367	388	378	-35.90	-27.20	0.757660167130919	9	1-5,388-384;6-19,382-369	x-x,383-383[BULt];20-21,368-367[UP3]	..((((((((((((((.(((((&)))))-))))))))))))))..	CUGGGUGGUGGAGGGGAGGAGU&ACUUC-CUCUUCUAUUACCCUG	4	0.0119892	latex
