# Supplementary material for: Post-transcriptional regulation of several biological processes involved in latex production in Hevea brasiliensis
Source: PeerJ. 2020 Apr 29;8:e8932. doi: 10.7717/peerj.8932 (PMC7195832; doi:10.7717/peerj.8932)
Supplement: Table S22 [file peerj-08-8932-s022.xlsx]

## Sheet: 23.
RNA-Seq analysis in latex (counts and statistical analysis)								EdgeR WH-EH						EdgeR EH-ET
								genes	logFC	logCPM	PValue	FDR		genes	logFC	logCPM	PValue	FDR
								mRNA00000029_DCL1	-0.901636	11.0253	0.00126068	0.0120337		mRNA00000029_DCL1	-0.758543	10.7901	0.113892	0.797246
		Without ET	with ET	with ET				mRNA00000323_AGO1	0.334034	15.1137	0.335878	0.602858		mRNA00000323_AGO1	0.277136	15.304	0.560273	0.984403
		Healthy	Healthy	TPD				mRNA00000162_Protein_HASTY_1	-0.655347	7.09496	0.232875	0.457045		mRNA00000162_Protein_HASTY_1	-1.11581	7.14625	0.0266931	0.509595
	Counts							mRNA00000150_protein_HASTY1_isoform-X2	0.271113	7.4069	0.348204	0.607431		mRNA00000150_protein_HASTY1_isoform-X2	-0.331437	7.49051	0.508278	0.984403
		WH	EH	ET				mRNA00000153_serrate_RNA_effector_molecule	0.136499	8.9037	0.626407	0.854192		mRNA00000153_serrate_RNA_effector_molecule	0.41459	9.15866	0.390378	0.984403
	AGO1	19217.3	23865.3	26357				mRNA00000144_serrate_RNA_effector_molecule_isoform_X2	-0.166915	10.1832	0.44236	0.728874		mRNA00000144_serrate_RNA_effector_molecule_isoform_X2	0.730053	10.6482	0.12823	0.79836
	DCL1	1591.35	659.677	797.843				mRNA00000175_small_RNA_degrading_nuclease	0.39305	9.97345	0.163052	0.375184		mRNA00000175_small_RNA_degrading_nuclease	-0.44607	10.0351	0.35259	0.984403
	HST1	90.95	60.2633	55.2733				mRNA00000202_small_RNA_degrading_nuclease	0.0782194	5.74555	0.907647	1		mRNA00000202_small_RNA_degrading_nuclease	-1.34085	5.58263	0.0152338	0.399886
	HST1-X2	91.3333	111.333	91.3333				mRNA00000068_small_RNA_degrading_nuclease	0.00753727	8.66278	0.980017	1		mRNA00000068_small_RNA_degrading_nuclease	-0.434427	8.61658	0.369571	0.984403
	SE	278.54	309.677	423.59				mRNA00000001_HEN1	0.0929275	7.44905	0.726676	0.908345		mRNA00000001_HEN1	-0.258221	7.29874	0.422605	0.905582
	SE-X2	738.123	664.603	1555.78
	SDN.1	506.01	668.673	472.327
	SDN.2	28.2733	30.6567	8.52333
	SDN.3	239.06	239.01	194.81
	HEN1	113	110.667	88.3333
		WH	EH	ET
	AGO1	19217.3	23865.3	26357
		WH	EH	ET
	DCL1	1591.35	659.677	797.843
		WH	EH	ET
	HST1	90.95	60.2633	55.2733
	HST1-X2	91.3333	111.333	91.3333
		WH	EH	ET
	SE	278.54	309.677	423.59
	SE-X2	738.123	664.603	1555.78
		WH	EH	ET
	SDN.1	506.01	668.673	472.327
	SDN.2	28.2733	30.6567	8.52333
	SDN.3	239.06	239.01	194.81
		WH	EH	ET
	HEN1	113	110.667	88.3333
